# Supplementary material for: Brønsted acid promoted benzylic C–H bond functionalization of azaarenes: nucleophilic addition to aldehydes
Source: Royal Society of Chemistry journal article supplement (doi:10.1039/c2ob26604k), 2012-01-01

Electronic Supplementary Information

## **Brønsted Acid Promoted Benzylic C-H Bond Functionalization of Azaarenes: Nucleophilic Addition to Aldehydes**

Fang-Fang Wang, Cui-Ping Luo, Yi Wang, Guojun Deng, and Luo Yang\*

Key Laboratory for Environmentally Friendly Chemistry and Application of the Ministry of

Education, Department of Chemistry, Xiangtan University, Hunan, 411105, China

*Email: yangluo@xut.edu.cn*

### **Table of Contents**

|                                                                                           |               |
|-------------------------------------------------------------------------------------------|---------------|
| <b>1. General information</b>                                                             | <b>S1</b>     |
| <b>2. General experimental procedures for benzylic C-H functionalization of azaarenes</b> | <b>S2</b>     |
| <b>3. Characterization data of product 3a-3t</b>                                          | <b>S3-S8</b>  |
| <b>4. Copies of <sup>1</sup>H and <sup>13</sup>C NMR spectra of products 3a-3t</b>        | <b>S9-S48</b> |

#### **1. General information**

Thin-layer chromatography (TLC) was performed using E. Merck silica gel 60 F254 precoated plates (0.25 mm) or Sorbent Silica Gel 60 F254 plates. The developed chromatography was analyzed by UV lamp (254 nm). High-resolution mass spectra (HRMS) were obtained from a JEOL JMS-700 instrument (ESI). Nuclear magnetic resonance (NMR) spectra were recorded on Varian MERCURY plus spectrometer (<sup>1</sup>H 500 MHz, <sup>13</sup>C 125 MHz) or a Bruker Avance 400 spectrometer at ambient temperature. Chemical shifts for <sup>1</sup>H NMR spectra are reported in parts per million (ppm) from tetramethylsilane with the solvent resonance as the internal standard (chloroform: δ 7.26 ppm). Chemical shifts for <sup>13</sup>C NMR spectra are reported in parts per million (ppm) from tetramethylsilane with the solvent as the internal standard (CDCl<sub>3</sub>: δ 77.16 ppm). Data are reported as following: chemical shift, multiplicity (s = singlet, d = doublet, dd = doublet of doublets, t = triplet, q = quartet, m = multiplet, br = broad signal), coupling constant (Hz), and integration.

**Reagents:** Substituted 2-methylquinolines was synthesized starting from *para*-substituted anilines and crotonaldehyde according to the method reported by Minamikawa, J.-i. *et. al.*<sup>1</sup>. Liquid aromatic aldehydes, 2,6-lutidine, 2-picoline and 4-picoline were used after distillation. Solid aromatic aldehydes, ethyl glyoxylate (50 % in toluene) and organic solvents were used directly.

## 2. General experimental procedures for benzylic C-H functionalization of azaarenes

**Method A:** An oven-dried reaction vessel was charged with 2,6-lutidine (**1a**, 85.8 mg, 0.8 mmol, 4 equiv.), 1,2-dichloroethane (DCE, 0.2 mL), *p*-nitro-benzaldehyde (**2a**, 30.2 mg, 0.2 mmol) and acetic acid (12  $\mu$ L, 0.2 mmol, 1 equiv.) under argon. The vessel was sealed and heated at 100 °C (oil bath temperature) for 36 h. After the resulting mixture was cooled to room temperature, aqueous Na<sub>2</sub>CO<sub>3</sub> solution (5%, 10 ml) was added and the mixture was extracted with dichloromethane (3  $\times$  10 ml), and washed with brine (2  $\times$  10 ml). The organic layer was dried with anhydrous Na<sub>2</sub>SO<sub>4</sub>, and concentrated under vacuum. The residue was chromatographed on a silica gel column eluted with a mixture of petroleum ether and ethyl acetate (1:1) to give pure products **3a** (49.6 mg, 96 % yield).

**Method B:** An oven-dried reaction vessel was charged with 2-methylquinoline (**1b**, 57.3 mg, 0.4 mmol, 2 equiv.), 1,4-dioxane (0.2 mL), H<sub>2</sub>O (20  $\mu$ L), *p*-nitro-benzaldehyde (**2a**, 30.2 mg, 0.2 mmol) and acetic acid (12  $\mu$ L, 0.2 mmol, 1 equiv.) under argon. The vessel was sealed and heated at 80 °C (oil bath temperature) for 5 h. After the resulting mixture was cooled to room temperature, aqueous Na<sub>2</sub>CO<sub>3</sub> solution (5%, 10 ml) was added and the mixture was extracted with dichloromethane (3  $\times$  10 ml), and washed with brine (2  $\times$  10 ml). The organic layer was dried with anhydrous Na<sub>2</sub>SO<sub>4</sub>, and concentrated under vacuum. The residue was chromatographed on a silica gel column eluted with a mixture of petroleum ether and ethyl acetate (1:1) to give pure products **3h** (52.1 mg, 95 % yield).

## 2. Characterization data of product 3a-3t

---

<sup>1</sup> Matsugi, M.; Fujio Tabusa, F.; Minamikawa, J.-i. *Tetrahedron Lett.* **2000**, *41*, 8523-8525.

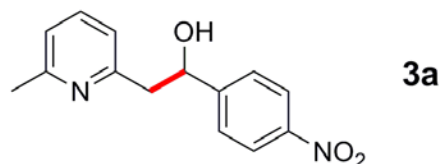

**3a:**  $^1\text{H}$  NMR (500 MHz,  $\text{CDCl}_3$ , TMS)  $\delta$  8.20 (dt,  $J=2.5, 9.0$  Hz, 2H), 7.60 (dt,  $J=2.5, 9.0$  Hz, 2H), 7.52 (t,  $J=8.0$  Hz, 1H), 7.07 (d,  $J=8.0$  Hz, 1H), 6.90 (d,  $J=8.0$  Hz, 1H), 5.25 (dd,  $J=2.5, 8.5$  Hz, 1H), 3.12 (dd,  $J=3.0, 15.0$  Hz, 1H), 3.04 (dd,  $J=9.0, 15.0$  Hz, 1H), 2.57 (s, 3H);  $^{13}\text{C}$  NMR (125 MHz,  $\text{CDCl}_3$ , TMS)  $\delta$  158.4, 157.7, 151.1, 147.3, 137.6, 126.8, 123.8, 121.9, 120.9, 72.8, 44.7, 24.6; HRMS (ESI)  $m/z$ :  $[\text{M}+\text{H}]^+$  calcd for  $\text{C}_{14}\text{H}_{15}\text{O}_3\text{N}_2$ , 259.1077; found : 259.1064.

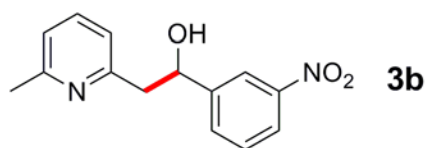

**3b:**  $^1\text{H}$  NMR (500 MHz,  $\text{CDCl}_3$ , TMS)  $\delta$  8.30 (t,  $J=1.5$  Hz, 1H), 8.11 (dd,  $J=1.0, 8.0$  Hz, 1H), 7.78 (d,  $J=6.5$  Hz, 1H), 7.54 (d,  $J=8.0$  Hz, 1H), 7.50 (d,  $J=8.0$  Hz, 1H), 7.07 (d,  $J=7.0$  Hz, 1H), 6.91 (d,  $J=8.0$  Hz, 1H), 5.24 (dd,  $J=3.0, 9.0$  Hz, 1H), 3.03-3.14 (m, 2H), 2.57 (s, 3H);  $^{13}\text{C}$  NMR (125 MHz,  $\text{CDCl}_3$ , TMS)  $\delta$  158.5, 157.7, 148.5, 146.7, 137.6, 132.2, 129.4, 122.4, 121.9, 121.2, 120.8, 72.7, 44.8, 24.6; HRMS (ESI)  $m/z$ :  $[\text{M}+\text{H}]^+$  calcd for  $\text{C}_{14}\text{H}_{15}\text{O}_3\text{N}_2$ , 259.1077; found : 259.1065.

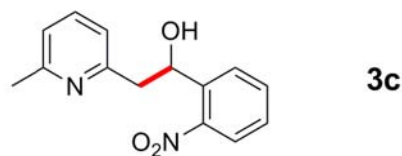

**3c:**  $^1\text{H}$  NMR (500 MHz,  $\text{CDCl}_3$ , TMS)  $\delta$  7.99 (dd,  $J=1.5, 8.0$  Hz, 1H), 7.96 (dd,  $J=1.5, 8.0$  Hz, 1H), 7.62-7.66 (m, 1H), 7.54 (t,  $J=8.0$  Hz, 1H), 7.40-7.43 (m, 1H), 7.07 (d,  $J=8.0$  Hz, 1H), 6.98 (d,  $J=8.0$  Hz, 1H), 5.62 (dd,  $J=2.0, 9.0$  Hz, 1H), 3.30 (dd,  $J=2.0, 15.0$  Hz, 1H), 3.00 (dd,  $J=9.0, 15.0$  Hz, 1H), 2.57 (s, 3H);  $^{13}\text{C}$  NMR (125 MHz,  $\text{CDCl}_3$ , TMS)  $\delta$  159.0, 157.6, 147.8, 139.9, 137.7, 133.7, 128.8, 128.1, 124.4, 121.8, 120.9, 69.4, 44.4, 24.6; HRMS (ESI)  $m/z$ :  $[\text{M}+\text{H}]^+$  calcd for  $\text{C}_{14}\text{H}_{15}\text{O}_3\text{N}_2$ , 259.1077; found : 259.1068.

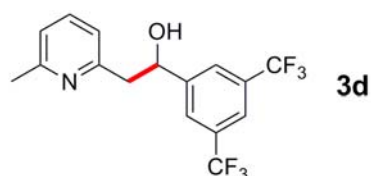

**3d:**  $^1\text{H}$  NMR (500 MHz,  $\text{CDCl}_3$ , TMS)  $\delta$  7.90 (s, 2H), 7.77 (s, 1H), 7.54 (t,  $J=8.0$  Hz, 1H), 7.08 (d,  $J=8.0$  Hz, 1H), 6.92 (d,  $J=8.0$  Hz, 1H), 5.26 (dd,  $J=2.5, 9.0$  Hz, 1H), 3.12 (dd,  $J=3.0, 15.0$  Hz, 1H),

3.05 (dd,  $J=9.0, 15.0$  Hz, 1H), 2.57 (s, 3H);  $^{13}\text{C}$  NMR (125 MHz,  $\text{CDCl}_3$ , TMS)  $\delta$  158.3, 157.8, 147.1, 137.7, 131.7 (q,  $J=33.0$  Hz), 126.4 (q,  $J=2.6$  Hz), 123.7 (d,  $J=271.1$  Hz), 122.0, 121.3 (q,  $J=3.9$  Hz), 120.9, 72.5, 44.8, 24.5; HRMS (ESI)  $m/z$  :  $[\text{M}+\text{H}]^+$  calcd for  $\text{C}_{16}\text{H}_{14}\text{ONF}_6$ , 350.0974; found: 350.0957.

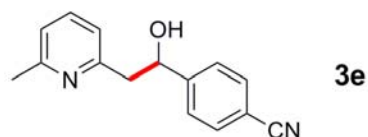

**3e:**  $^1\text{H}$  NMR (500 MHz,  $\text{CDCl}_3$ , TMS)  $\delta$  7.63 (dt,  $J=2.0, 8.5$  Hz, 2H), 7.50-7.55 (m, 3H), 7.06 (d,  $J=8.0$  Hz, 1H), 6.89 (d,  $J=8.0$  Hz, 1H), 5.19 (dd,  $J=3.0, 9.0$  Hz, 1H), 3.01-3.10 (m, 2H), 2.56 (s, 3H);  $^{13}\text{C}$  NMR (125 MHz,  $\text{CDCl}_3$ , TMS)  $\delta$  158.6, 157.7, 149.8, 137.6, 132.4, 126.7, 121.8, 120.8, 119.2, 111.1, 72.90, 44.8, 24.6; HRMS (ESI)  $m/z$  :  $[\text{M}+\text{H}]^+$  calcd for  $\text{C}_{15}\text{H}_{15}\text{ON}_2$ , 239.1179; found : 239.1168.

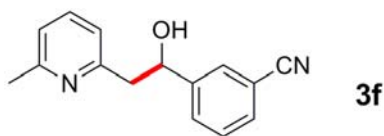

**3f:**  $^1\text{H}$  NMR (400 MHz,  $\text{CDCl}_3$ , TMS)  $\delta$  7.74 (s, 1H), 7.67 (d,  $J=8.0$  Hz, 1H), 7.53 (m, 2H), 7.45 (t,  $J=8.4$  Hz, 1H), 7.07 (d,  $J=7.2$  Hz, 1H), 6.90 (d,  $J=8.0$  Hz, 1H), 5.17 (dd,  $J=2.8, 8.0$  Hz, 1H), 3.11-3.00 (m, 2H), 2.57 (s, 3H);  $^{13}\text{C}$  NMR (100 MHz,  $\text{CDCl}_3$ , TMS)  $\delta$  158.4, 157.6, 145.9, 137.5, 130.9, 130.4, 129.7, 129.1, 121.7, 120.8, 119.0, 112.4, 72.5, 44.9, 24.4; HRMS (ESI)  $m/z$ :  $[\text{M}+\text{H}]^+$  calcd for  $\text{C}_{15}\text{H}_{15}\text{ON}_2$ , 239.1179; found : 239.1165.

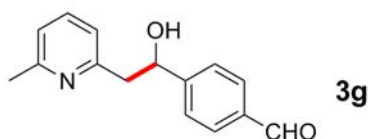

**3g:**  $^1\text{H}$  NMR (500 MHz,  $\text{CDCl}_3$ , TMS)  $\delta$  10.00 (s, 1H), 7.86 (d,  $J=8.5$  Hz, 2H), 7.60 (d,  $J=8.5$  Hz, 2H), 7.51 (t,  $J=8.0$  Hz, 1H), 7.06 (d,  $J=8.0$  Hz, 1H), 6.90 (d,  $J=7.5$  Hz, 1H), 5.22 (dd,  $J=3.5, 9.0$  Hz, 1H), 3.03-3.12 (m, 2H), 2.58 (s, 3H);  $^{13}\text{C}$  NMR (125 MHz,  $\text{CDCl}_3$ , TMS)  $\delta$  192.3, 158.8, 157.7, 151.4, 137.6, 135.7, 130.1, 126.6, 121.7, 120.8, 73.2, 44.8, 24.6; HRMS (ESI)  $m/z$  :  $[\text{M}+\text{H}]^+$  calcd for  $\text{C}_{15}\text{H}_{16}\text{O}_2\text{N}$ , 242.1176, found : 242.1166.

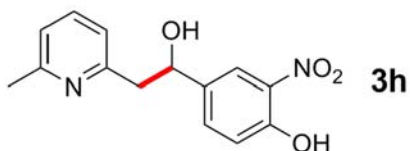

**3h**:  $^1\text{H}$  NMR (400 MHz,  $\text{CDCl}_3$ , TMS)  $\delta$  10.53 (s, 1H), 8.17 (s, 1H), 7.67 (d,  $J=6.8$  Hz, 1H), 7.52 (t,  $J=8.4$  Hz, 1H), 7.14 (d,  $J=8.8$  Hz, 1H), 7.06 (d,  $J=7.2$  Hz, 1H), 6.91 (d,  $J=7.6$  Hz, 1H), 5.13 (dd,  $J=2.8, 7.2$  Hz, 1H), 3.09-3.00 (m, 2H), 2.57 (s, 3H);  $^{13}\text{C}$  NMR (100 MHz,  $\text{CDCl}_3$ , TMS)  $\delta$  158.5, 157.7, 154.3, 137.5, 137.1, 135.4, 133.5, 122.3, 121.7, 120.8, 119.9, 72.1, 44.8, 24.4; HRMS (ESI)  $m/z$ :  $[\text{M}+\text{H}]^+$  calcd for  $\text{C}_{14}\text{H}_{15}\text{O}_4\text{N}_2$ , 275.1032; found : 275.1021.

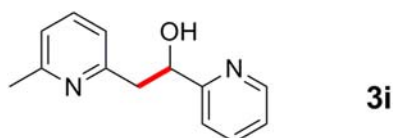

**3i**:  $^1\text{H}$  NMR (400 MHz,  $\text{CDCl}_3$ , TMS)  $\delta$  8.55 (d,  $J=3.2$ , 1H), 7.68 (t,  $J=7.6$  Hz, 1H), 7.56 (d,  $J=7.6$  Hz, 1H), 7.49 (d,  $J=8.8$  Hz, 1H), 7.17 (s, 1H), 7.03 (d,  $J=8.4$  Hz, 1H), 6.96 (d,  $J=8.0$  Hz, 1H), 5.20 (dd,  $J=2.4, 8.8$  Hz, 1H), 3.34 (dd,  $J=2.4, 14.8$  Hz, 1H), 3.08 (dd,  $J=8.8, 14.4$  Hz, 1H), 2.55 (s, 3H);  $^{13}\text{C}$  NMR (100 MHz,  $\text{CDCl}_3$ , TMS)  $\delta$  163.0, 159.0, 157.4, 148.5, 137.2, 136.7, 122.1, 121.3, 120.9, 120.4, 73.9, 44.1, 24.4; HRMS (ESI)  $m/z$ :  $[\text{M}+\text{H}]^+$  calcd for  $\text{C}_{13}\text{H}_{15}\text{O}_2\text{N}$ , 215.1184; found : 215.1168.

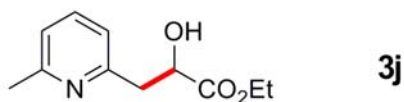

**3j**:  $^1\text{H}$  NMR (500 MHz,  $\text{CDCl}_3$ , TMS)  $\delta$  7.50 (t,  $J=7.5$  Hz, 1H), 7.02 (d,  $J=8.0$  Hz, 1H), 6.97 (d,  $J=8.0$  Hz, 1H), 4.62 (dd,  $J=3.5, 7.0$  Hz, 1H), 4.19 (d,  $J=2.0$  Hz, 2H), 3.26 (dd,  $J=3.5, 15.0$  Hz, 1H), 3.14 (dd,  $J=7.0, 10.0$  Hz, 1H), 2.50 (s, 3H), 1.22 (t,  $J=7.0$  Hz, 3H);  $^{13}\text{C}$  NMR (125 MHz,  $\text{CDCl}_3$ , TMS)  $\delta$  173.9, 157.8, 137.3, 121.7, 120.6, 120.9, 70.9, 61.4, 40.3, 24.5, 14.4; HRMS (ESI)  $m/z$  :  $[\text{M}+\text{H}]^+$  calcd for  $\text{C}_{11}\text{H}_{16}\text{O}_3\text{N}$ , 210.1125; found: 210.1119.

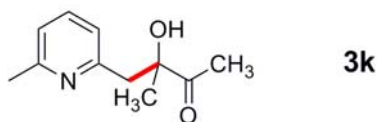

**3k**:  $^1\text{H}$  NMR (500 MHz,  $\text{CDCl}_3$ , TMS)  $\delta$  7.51 (t,  $J=6.8$ , 1H), 6.99 (d,  $J=7.6$  Hz, 1H), 6.95 (d,  $J=7.6$  Hz, 1H), 3.33 (d,  $J=3.6$  Hz, 1H), 2.96 (d,  $J=15.2$  Hz, 1H), 2.48 (s, 3H), 2.26 (s, 3H), 1.35 (s, 3H);  $^{13}\text{C}$  NMR (125 MHz,  $\text{CDCl}_3$ , TMS)  $\delta$  215.0, 158.0, 157.1, 137.4, 121.4, 121.36, 80.0, 44.5, 25.8, 25.5, 24.2; HRMS (ESI)  $m/z$  :  $[\text{M}+\text{H}]^+$  calcd for  $\text{C}_{11}\text{H}_{16}\text{O}_2\text{N}$ , 194.1181; found: 194.1172.

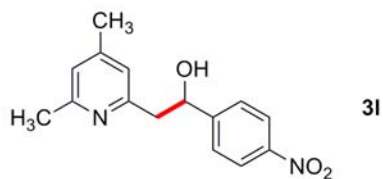

**3l:**  $^1\text{H}$  NMR (500 MHz,  $\text{CDCl}_3$ , TMS)  $\delta$  8.20 (d,  $J=8.8$ , 2H), 7.59 (d,  $J=8.8$  Hz, 2H), 6.89 (s, 1H), 6.73 (s, 1H), 5.22 (dd,  $J=2.0$ , 8.8 Hz, 1H), 3.08-2.95 (m, 2H), 2.52 (s, 3H), 2.28 (s, 3H);  $^{13}\text{C}$  NMR (125 MHz,  $\text{CDCl}_3$ , TMS)  $\delta$  158.1, 157.3, 152.2, 148.8, 147.2, 126.7, 123.6, 122.6, 121.7, 72.7, 44.5, 24.2, 21.0; HRMS (ESI)  $m/z$  :  $[\text{M}+\text{H}]^+$  calcd for  $\text{C}_{15}\text{H}_{17}\text{O}_3\text{N}_2$ , 273.1239; found: 273.1231.

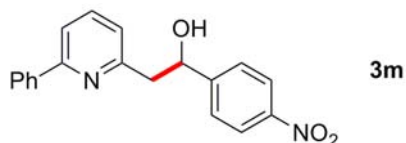

**3m:**  $^1\text{H}$  NMR (500 MHz,  $\text{CDCl}_3$ , TMS)  $\delta$  8.21 (d,  $J=8.4$ , 2H), 7.96 (d,  $J=7.2$  Hz, 2H), 7.72 (t,  $J=7.6$  Hz, 1H), 7.66 (d,  $J=8.8$  Hz, 1H), 7.62 (d,  $J=8.0$  Hz, 2H), 7.53-7.46 (m, 3H), 7.05 (d,  $J=7.2$  Hz, 1H), 6.76 (s, 1H), 5.37 (d,  $J=6.0$  Hz, 1H), 3.26-3.14 (m, 2H);  $^{13}\text{C}$  NMR (125 MHz,  $\text{CDCl}_3$ , TMS)  $\delta$  158.9, 156.8, 151.7, 147.4, 138.7, 138.2, 129.6, 129.1, 127.0, 126.8, 123.7, 122.3, 119.2, 72.6, 44.9; HRMS (ESI)  $m/z$  :  $[\text{M}+\text{H}]^+$  calcd for  $\text{C}_{19}\text{H}_{17}\text{O}_3\text{N}_2$ , 321.1239; found: 321.1232.

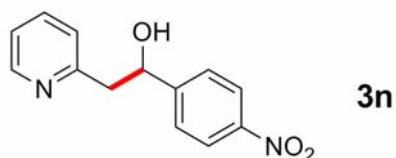

**3n:** known compound, CAS: 20151-01-3; the following NMR data were the same as literature report<sup>2</sup>.  $^1\text{H}$  NMR (400 MHz,  $\text{CDCl}_3$ , TMS)  $\delta$  8.54 (s, 1H), 8.20 (d,  $J=8.0$  Hz, 2H), 7.65 (s, 1H), 7.60 (d,  $J=7.2$  Hz, 2H), 7.23 (s, 1H), 7.10 (d,  $J=6.4$  Hz, 1H), 6.42 (s, 1H), 5.29 (d,  $J=7.6$  Hz, 1H), 3.19-3.07 (m, 2H);  $^{13}\text{C}$  NMR (125 MHz,  $\text{CDCl}_3$ , TMS)  $\delta$  159.0, 151.6, 148.7, 147.3, 137.3, 126.7, 123.9, 123.7, 122.2, 72.5, 44.9.

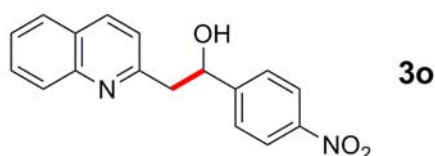

**3o:** known compound, CAS: 38101-97-2; the following NMR data were the same as literature

<sup>2</sup> Houminer, Y.; Williams, D. L. *J. Org. Chem.* **1983**, *48*, 2622-2625.

report<sup>3</sup>. <sup>1</sup>H NMR (400 MHz, CDCl<sub>3</sub>, TMS) δ 8.22 (d, *J*=8.8Hz, 2H), 8.13 (d, *J*=8.0Hz, 1H), 8.06 (d, *J*=8.4 Hz, 1H), 7.82 (d, *J*=7.6 Hz, 1H), 7.76 (t, *J*=7.2 Hz, 1H), 7.65 (d, *J*=8.8 Hz, 2H), 7.56 (t, *J*=7.2 Hz, 1H), 7.22 (d, *J*=8.8 Hz, 1H), 6.72 (s, 1H), 5.45 (d, *J*=5.6 Hz, 1H), 3.38-3.25 (m, 2H); <sup>13</sup>C NMR (100 MHz, CDCl<sub>3</sub>, TMS) δ 159.6, 151.9, 148.0, 146.6, 136.2, 129.6, 129.0, 128.9, 127.6, 126.8, 126.1, 123.6, 121.9, 45.8, 45.2.

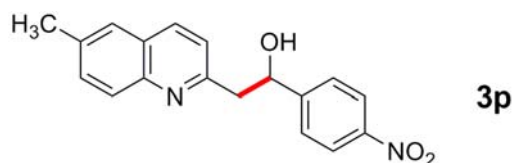

**3p:** <sup>1</sup>H NMR (400 MHz, CDCl<sub>3</sub>, TMS) δ 8.21 (d, *J*=8.4 Hz, 2H), 8.02 (d, *J*=8.0 Hz, 1H), 7.95 (d, *J*=9.2 Hz, 1H), 7.64 (d, *J*=8.8 Hz, 2H), 7.57 (s, 2H), 7.16 (d, *J*=8.0 Hz, 1H), 6.79 (s, 1H), 5.42 (d, *J*=8.4 Hz, 1H), 3.35-3.22 (m, 2H), 2.55(s, 3H); <sup>13</sup>C NMR (100 MHz, CDCl<sub>3</sub>, TMS) δ 158.0, 157.1, 151.7, 147.4, 143.1, 136.1, 130.2, 128.1, 126.8, 123.7, 122.9, 122.3, 105.4, 72.4, 55.7, 45.2; HRMS (EI) *m/z* : [M]<sup>+</sup> calcd for C<sub>18</sub>H<sub>16</sub>O<sub>3</sub>N<sub>2</sub>, 308.1161; found :308.1166.

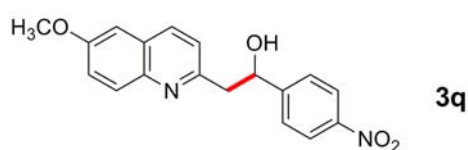

**3q:** <sup>1</sup>H NMR (400 MHz, CDCl<sub>3</sub>, TMS) δ 8.21 (d, *J*=8.8 Hz, 2H), 8.01 (d, *J*=8.4 Hz, 1H), 7.95 (d, *J*=9.2 Hz, 1H), 7.64 (d, *J*=8.0 Hz, 2H), 7.40 (dd, *J*=9.2, 2.4 Hz, 1H), 7.16 (d, *J*=8.0 Hz, 1H), 7.07 (d, *J*=2.0 Hz, 1H), 6.72 (s, 1H), 5.42 (d, *J*=6.8 Hz, 1H), 3.94 (s, 3H), 3.34-3.20 (m, 2H); <sup>13</sup>C NMR (100 MHz, CDCl<sub>3</sub>, TMS) δ 159.7, 152.0, 148.0, 146.6, 136.2, 132.4, 129.6, 129.0, 127.6, 126.8, 126.1, 123.5, 121.9, 72.4, 45.8, 45.2; HRMS (EI) *m/z* : [M]<sup>+</sup> calcd for C<sub>18</sub>H<sub>16</sub>O<sub>4</sub>N<sub>2</sub>, 324.1110; found: 324.1115.

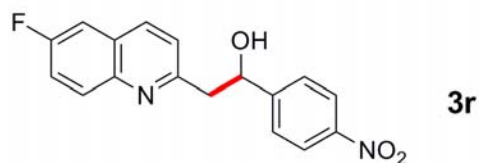

**3r:** <sup>1</sup>H NMR (400 MHz, CDCl<sub>3</sub>, TMS) δ 8.22 (d, *J*=8.8 Hz, 2H), 8.09 (d, *J*=4.0 Hz, 1H), 8.07 (s, 1H), 7.65 (d, *J*=8.4 Hz, 2H), 7.53 (d, *J*=2.8 Hz, 1H), 7.45 (dd, *J*=8.8, 2.4 Hz, 1H), 7.24 (d, *J*=8.8 Hz, 1H), 6.45 (s, 1H), 5.45 (d, *J*=8.4 Hz, 1H), 3.33-3.29 (m, 2H); <sup>13</sup>C NMR (125 MHz, CDCl<sub>3</sub>,

<sup>3</sup> Franck, X.; Fournet, A.; Prina, E.; Mahieux, R.; Hocquemiller, R.; Figadere, B. *Bioorg. Med. Chem. Lett.* **2004**, *14*, 3635-3638.

TMS)  $\delta$  161.8, 159.1, 151.4, 144.1, 136.7 (d,  $J=5.3$  Hz), 131.2 (d,  $J=9.0$  Hz), 130.0, 127.6, 126.8, 123.8, 122.8, 120.4 (d,  $J=157.0$  Hz), 111.0 (d,  $J=114.0$  Hz), 72.2, 45.3; HRMS (EI)  $m/z$  :  $[M]^+$  calcd for  $C_{17}H_{13}FO_3N_2$ , 312.0910; found: 312.0915.

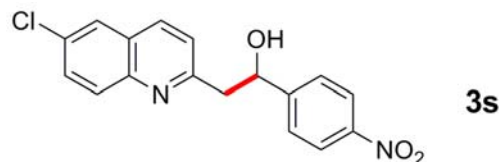

**3s:**  $^1H$  NMR (400 MHz,  $CDCl_3$ , TMS)  $\delta$  8.22 (d,  $J=8.4$  Hz, 2H), 8.05 (d,  $J=8.4$  Hz, 1H), 8.00 (d,  $J=8.4$ , 1H), 7.81 (s, 1H), 7.69 (dd,  $J=8.8$ , 1.2 Hz, 1H), 7.64 (d,  $J=8.8$  Hz, 2H), 7.25 (d,  $J=10.8$  Hz, 1H), 6.35 (s, 1H), 5.45 (d,  $J=6.8$  Hz, 1H), 3.37-3.25 (m, 2H);  $^{13}C$  NMR (100 MHz,  $CDCl_3$ , TMS)  $\delta$  160.1, 151.3, 147.4, 145.5, 136.3, 132.4, 131.1, 130.4, 127.7, 126.8, 126.5, 123.8, 123.0, 72.2, 45.6; HRMS (EI)  $m/z$  :  $[M]^+$  calcd for  $C_{17}H_{13}O_3N_2Cl$ , 328.0615; found: 328.0619.

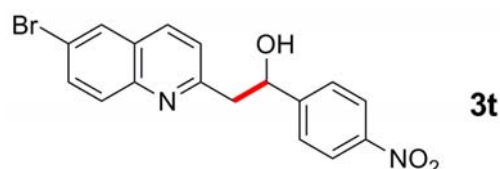

**3t:**  $^1H$  NMR (400 MHz,  $CDCl_3$ , TMS)  $\delta$  8.22 (d,  $J=8.4$  Hz, 2H), 8.04 (d,  $J=8.4$  Hz, 1H), 7.99 (s, 1H), 7.94 (d,  $J=9.2$  Hz, 1H), 7.82 (dd,  $J=8.8$ , 1.6 Hz, 1H), 7.64 (d,  $J=8.4$  Hz, 2H), 7.25 (d,  $J=8.8$  Hz, 1H), 6.37 (s, 1H), 5.45 (d,  $J=8.4$  Hz, 1H), 3.37-3.24 (m, 2H);  $^{13}C$  NMR (100 MHz,  $CDCl_3$ , TMS)  $\delta$  160.2, 151.2, 147.3, 145.6, 136.2, 133.6, 130.4, 129.8, 128.1, 126.7, 123.8, 122.9, 120.5, 72.1, 45.5; HRMS (EI)  $m/z$  :  $[M]^+$  calcd for  $C_{17}H_{13}O_3N_2Br$ , 374.0089; found: 374.0093.

#### 4. Copies of $^1H$ and $^{13}C$ NMR spectra of products 3a-3t



157 ppm

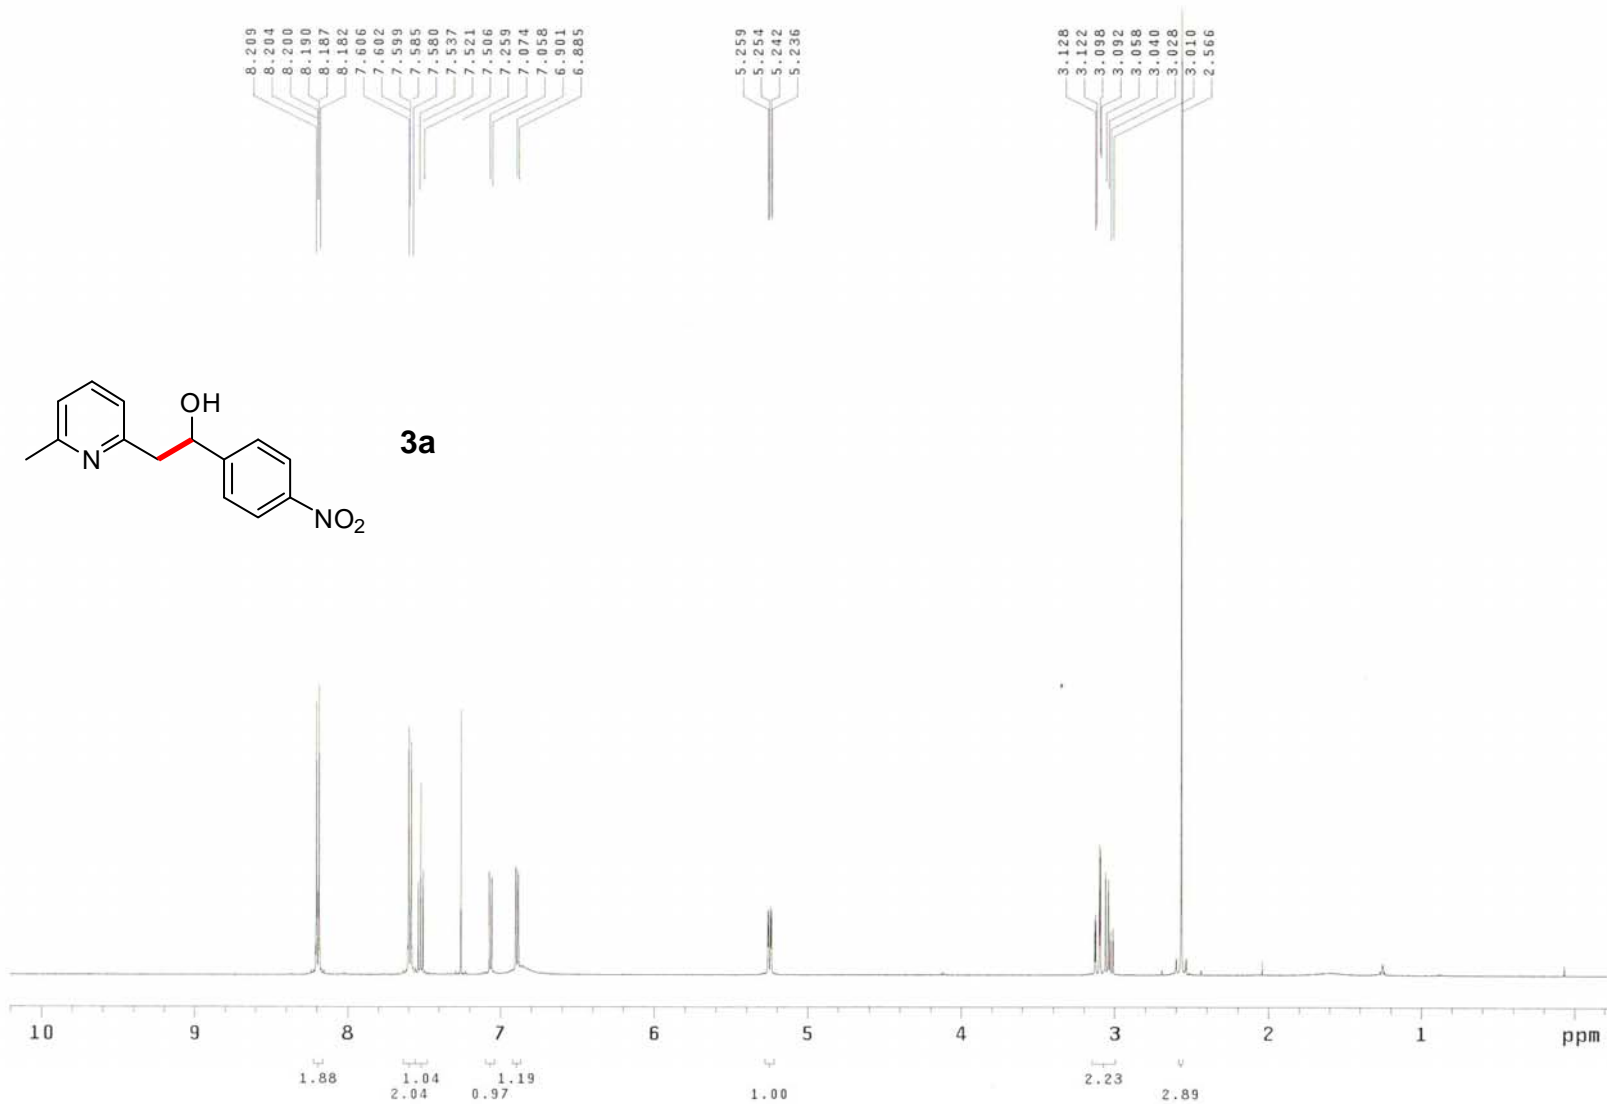

1697 ppm

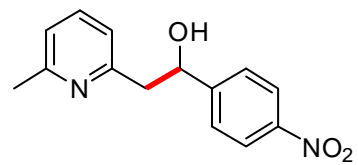

3a

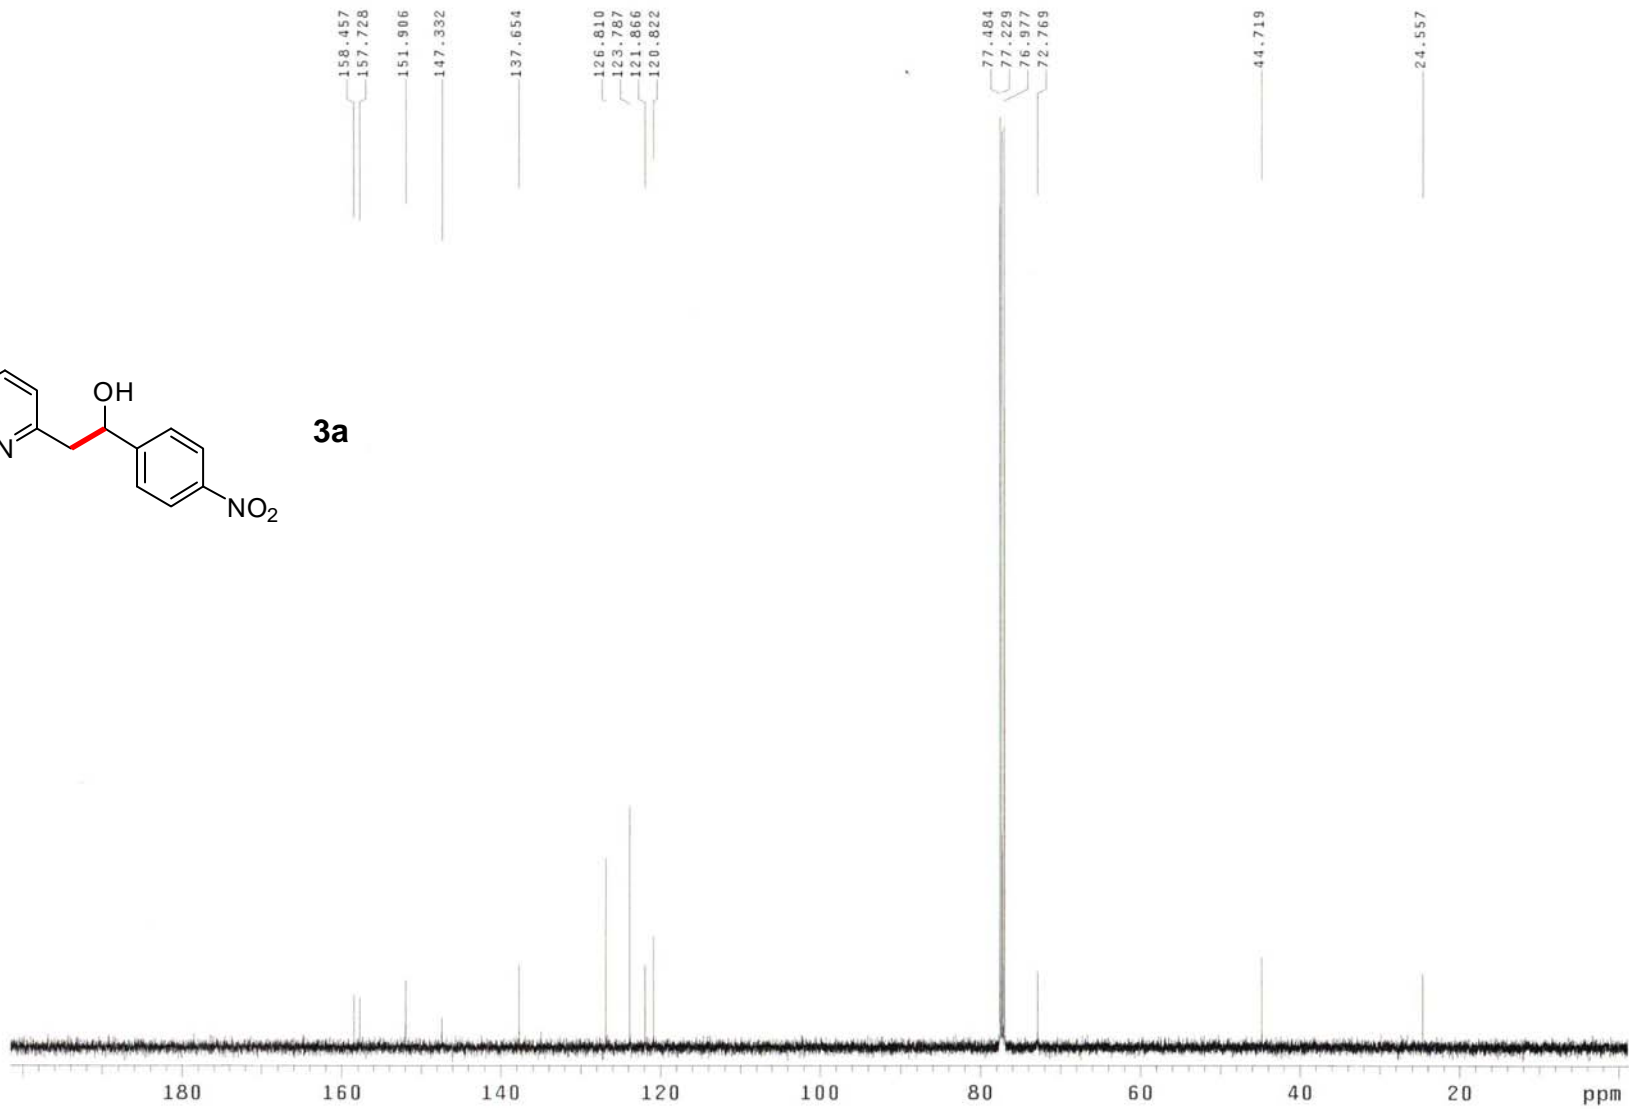

2034 ppm

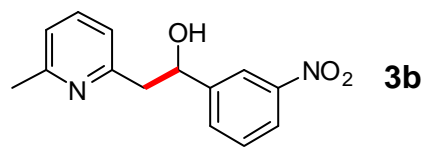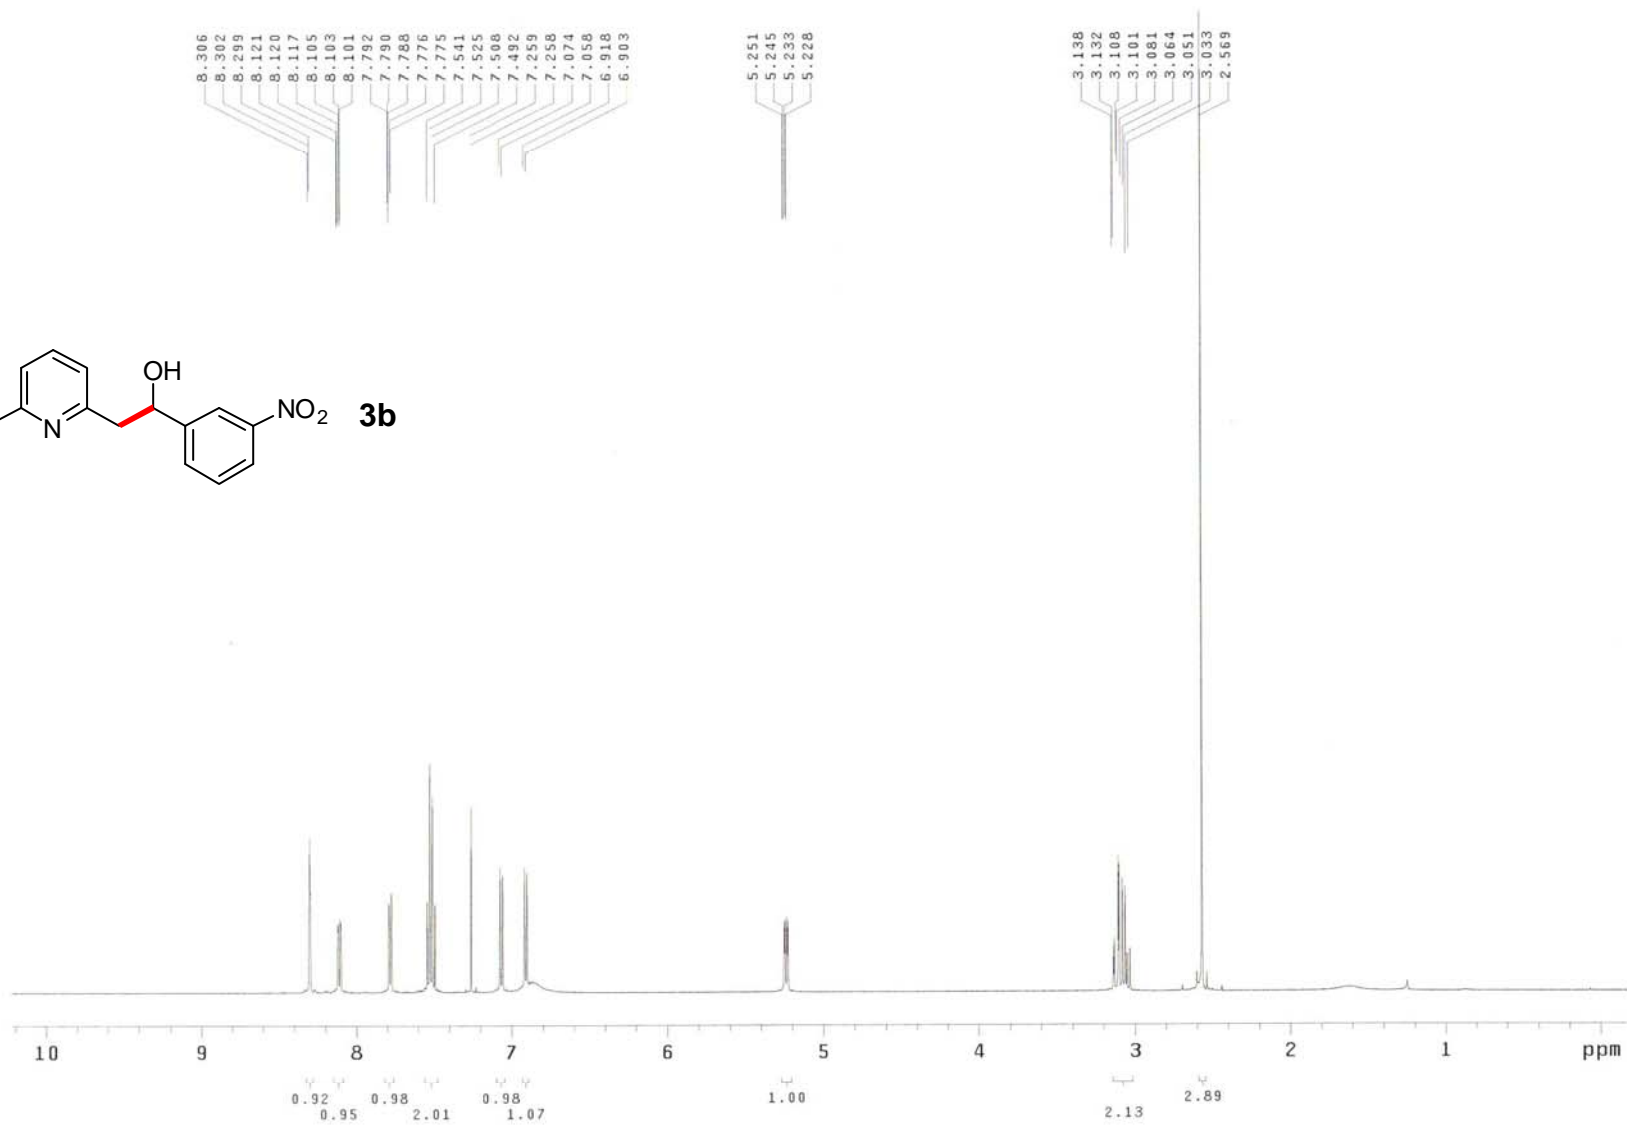

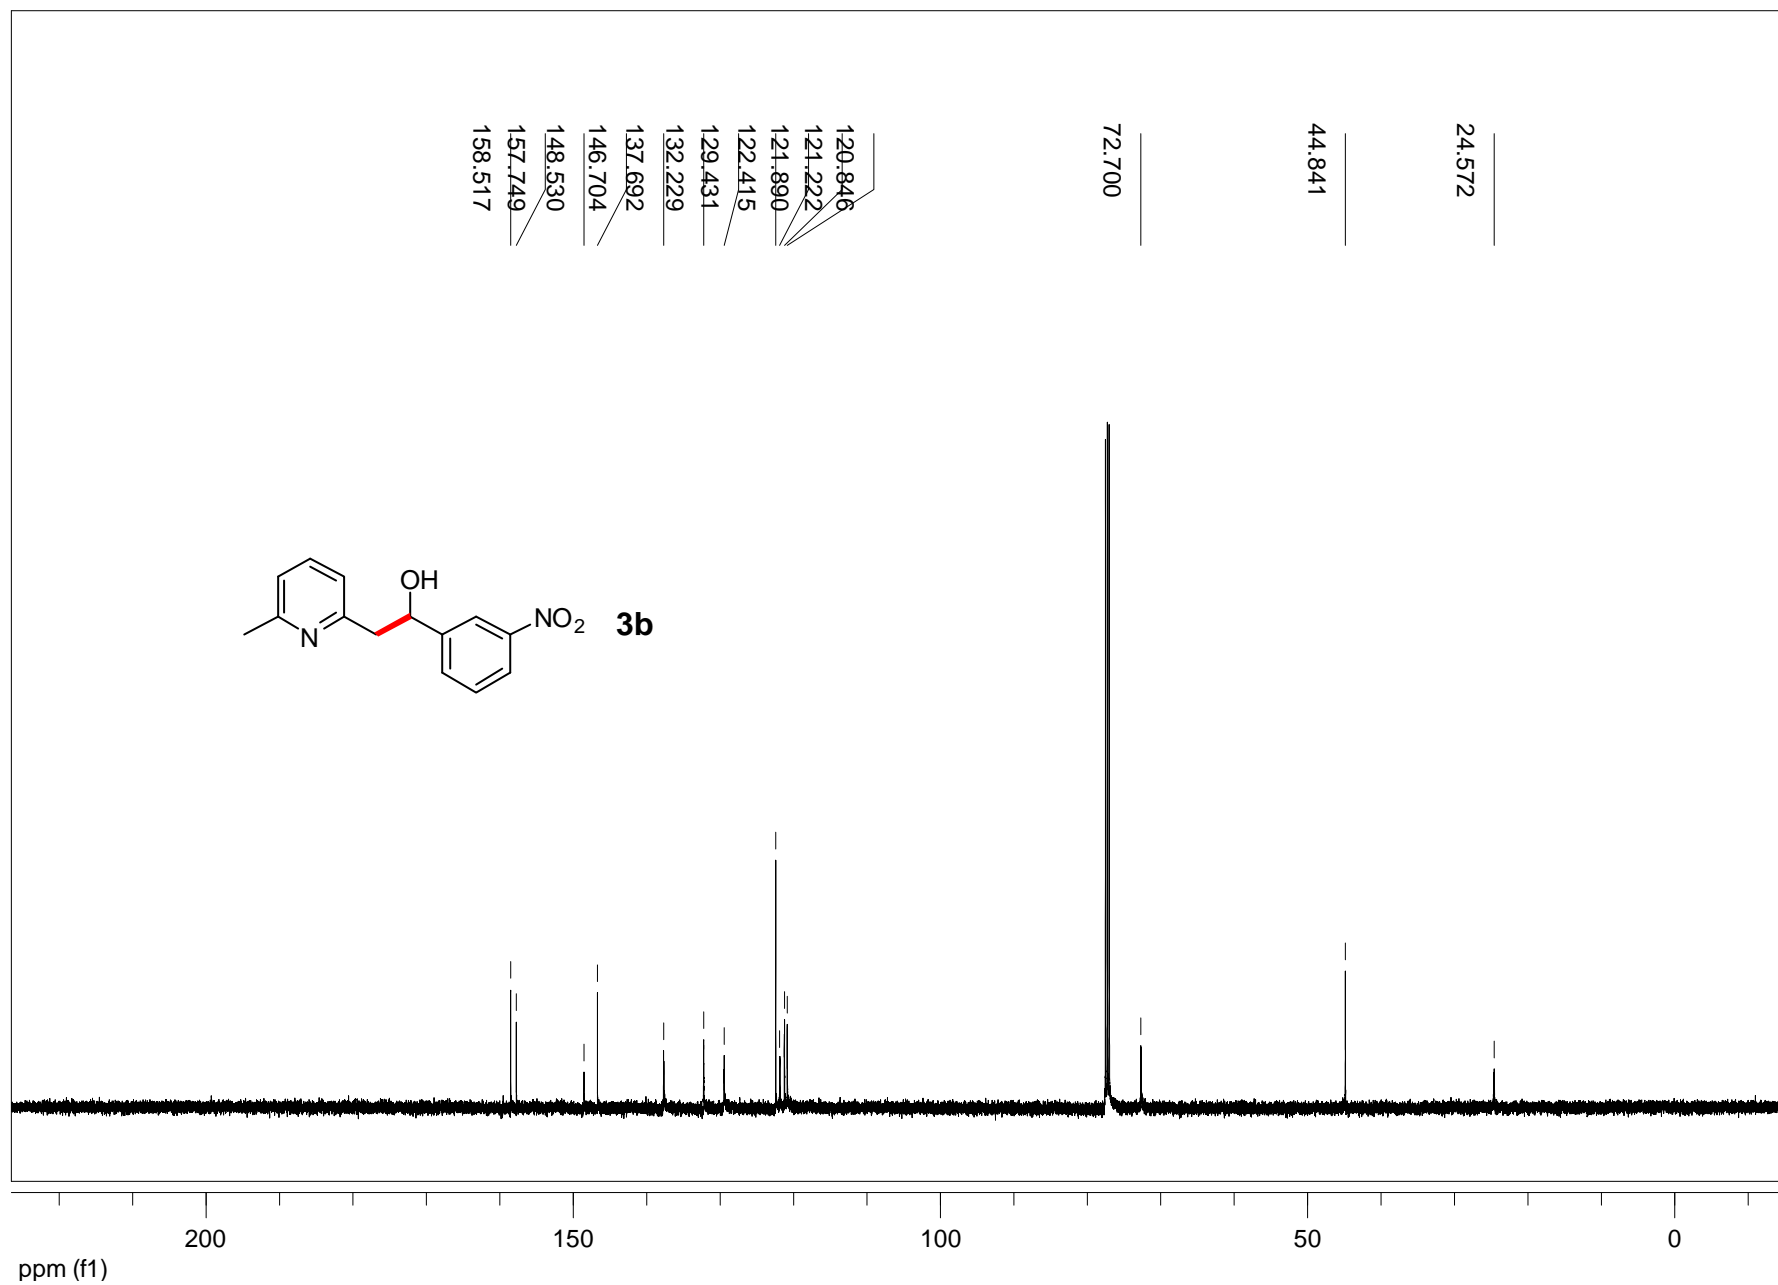

2033 3424

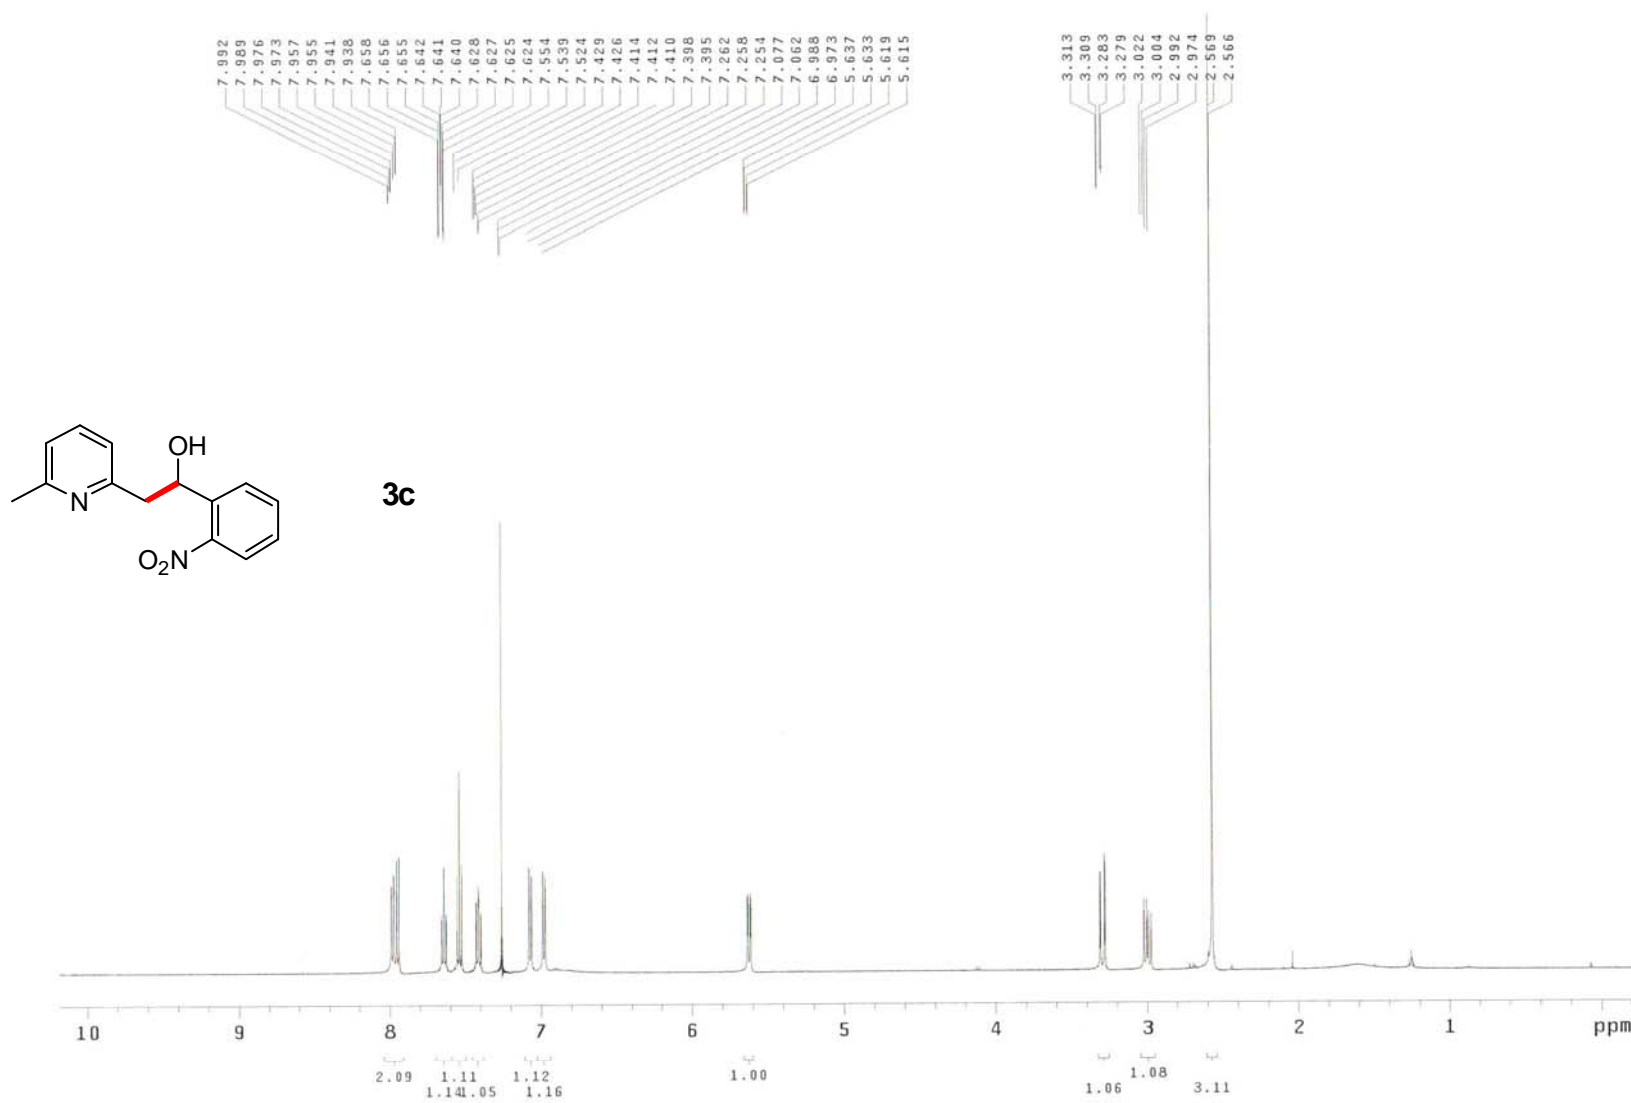

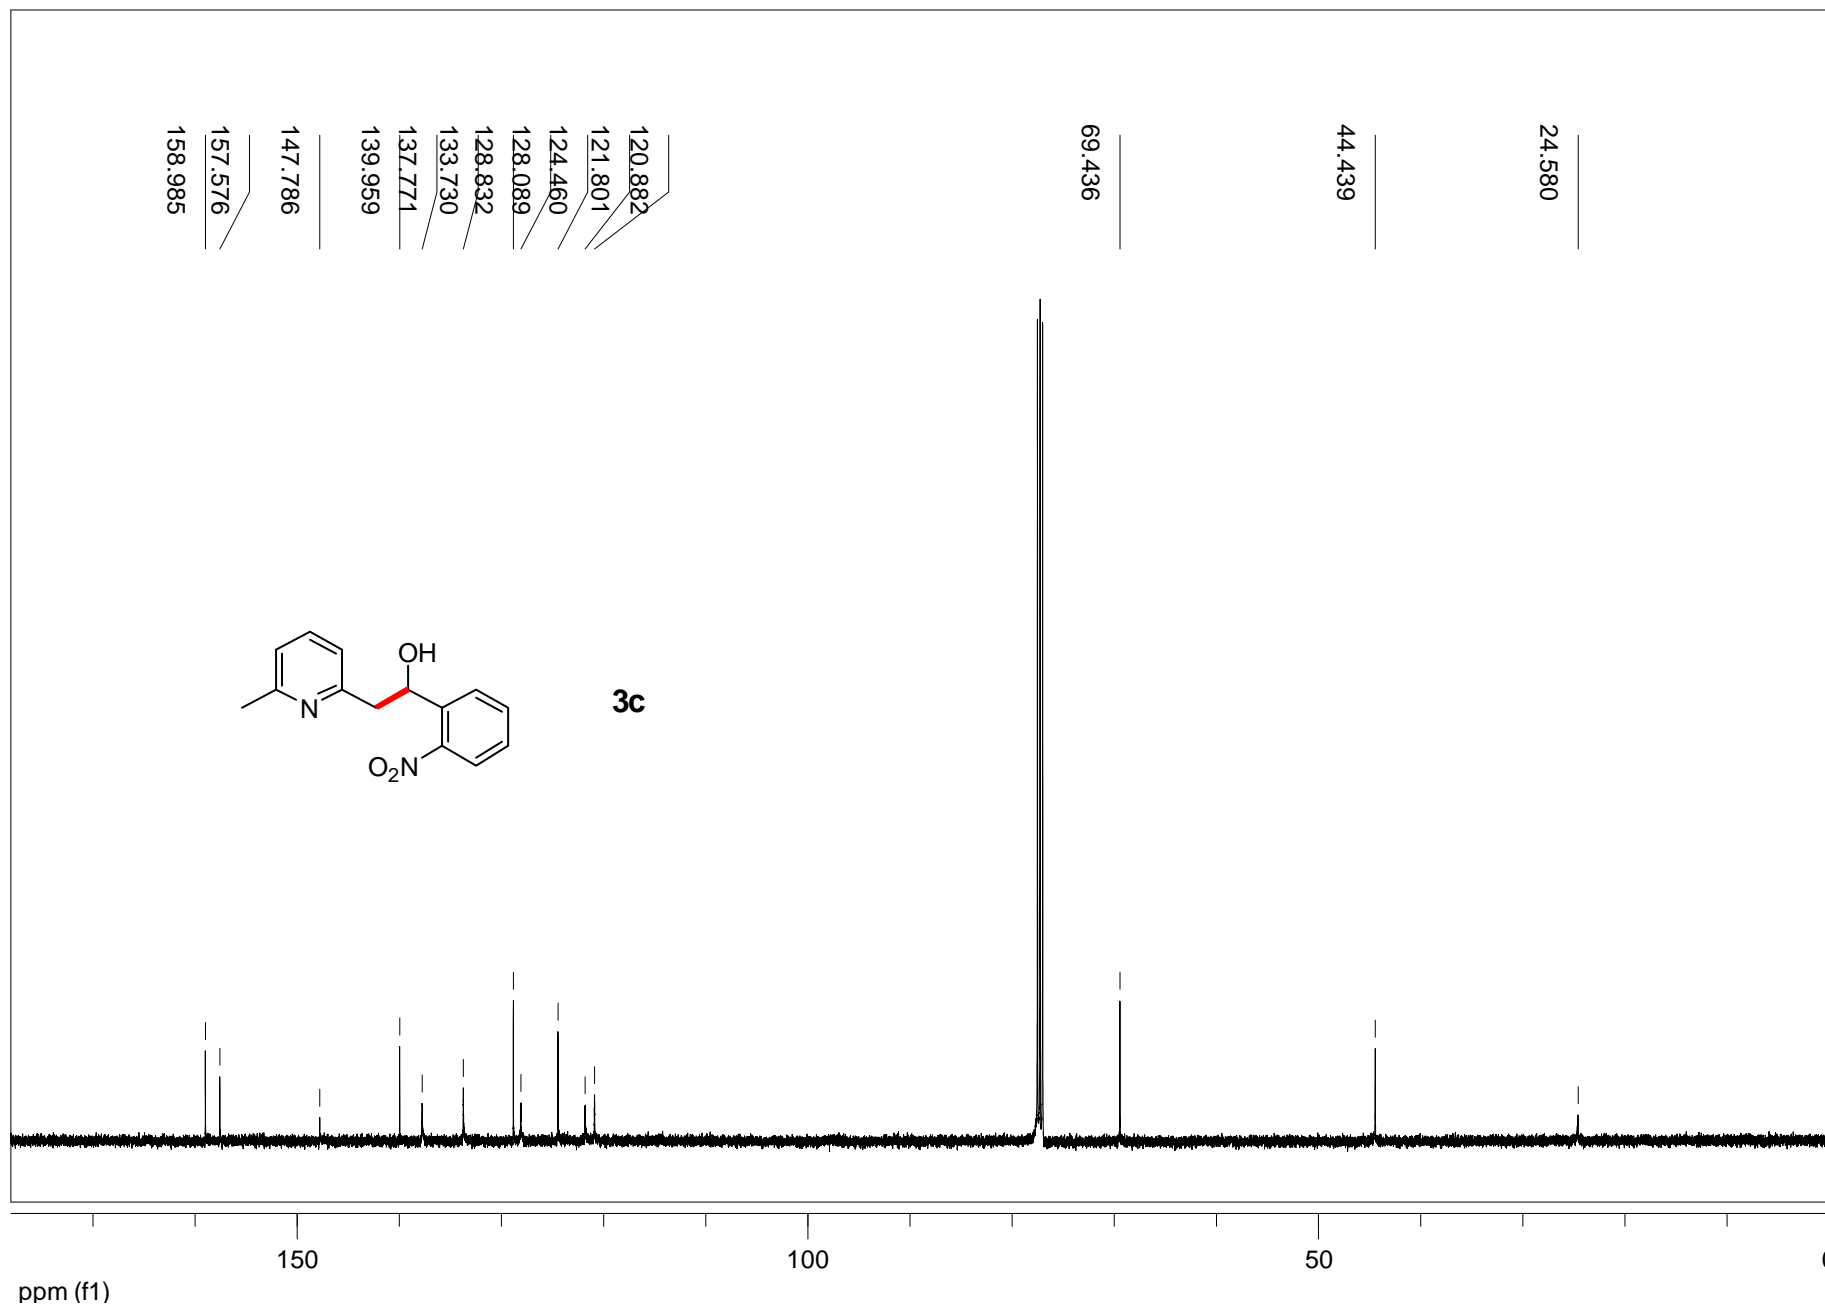

1569

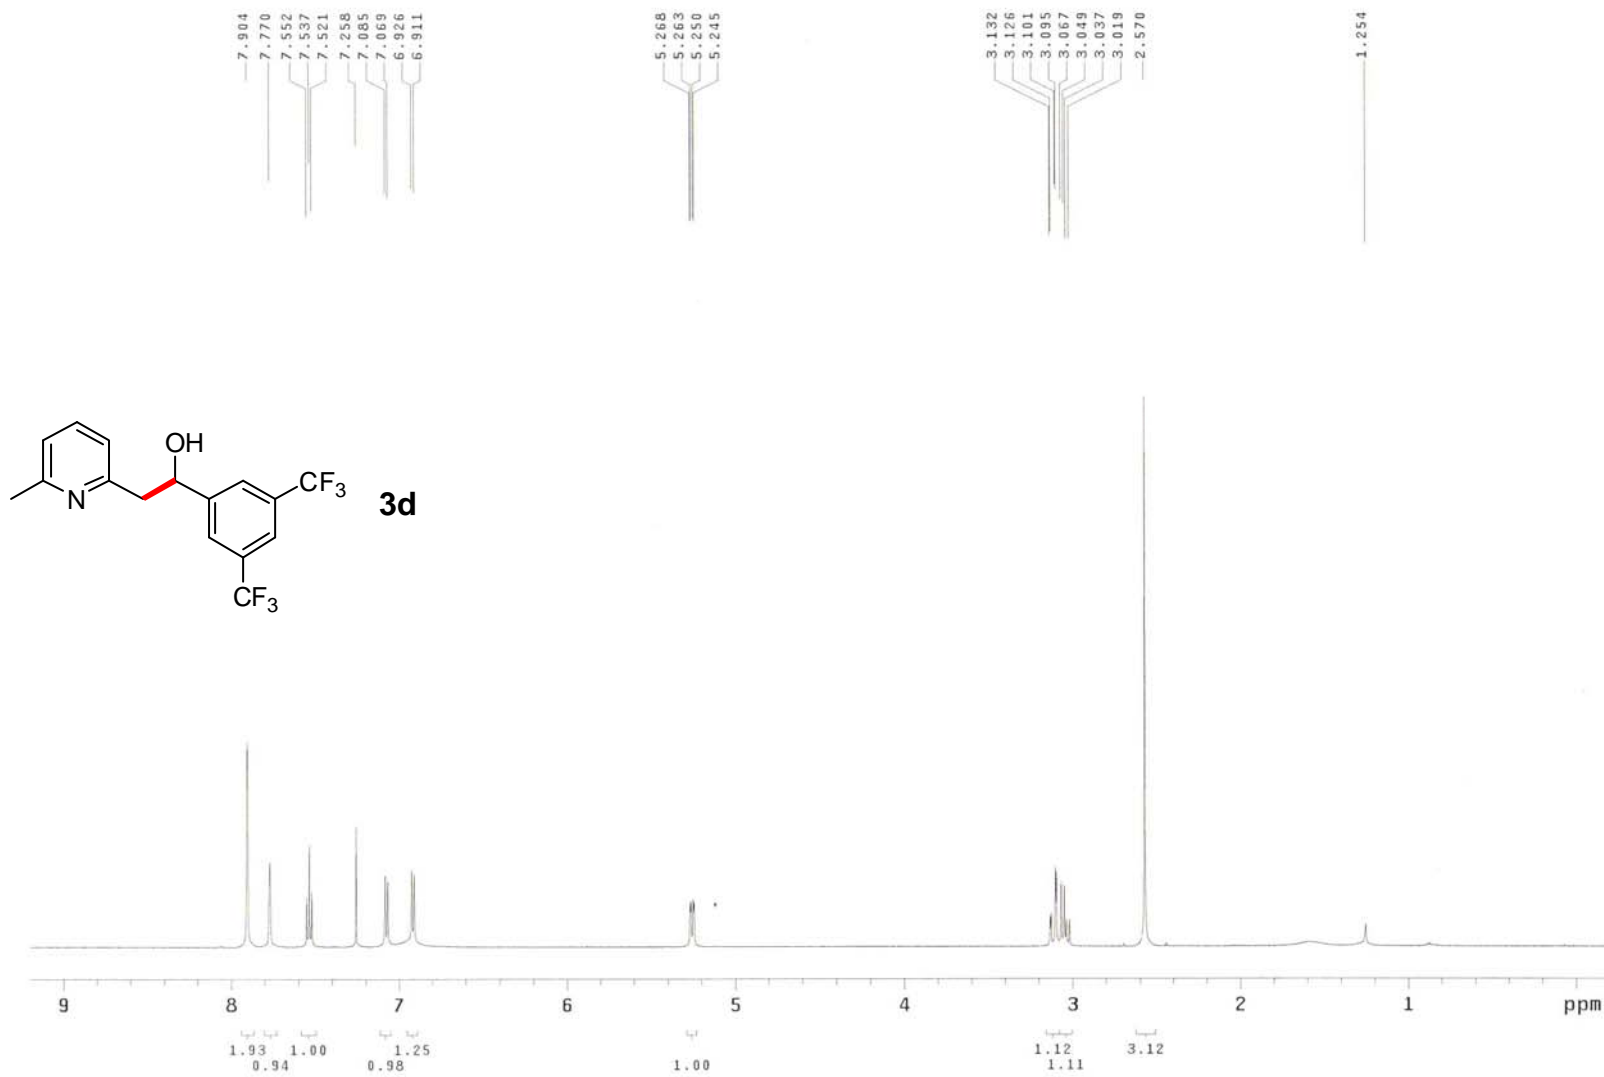

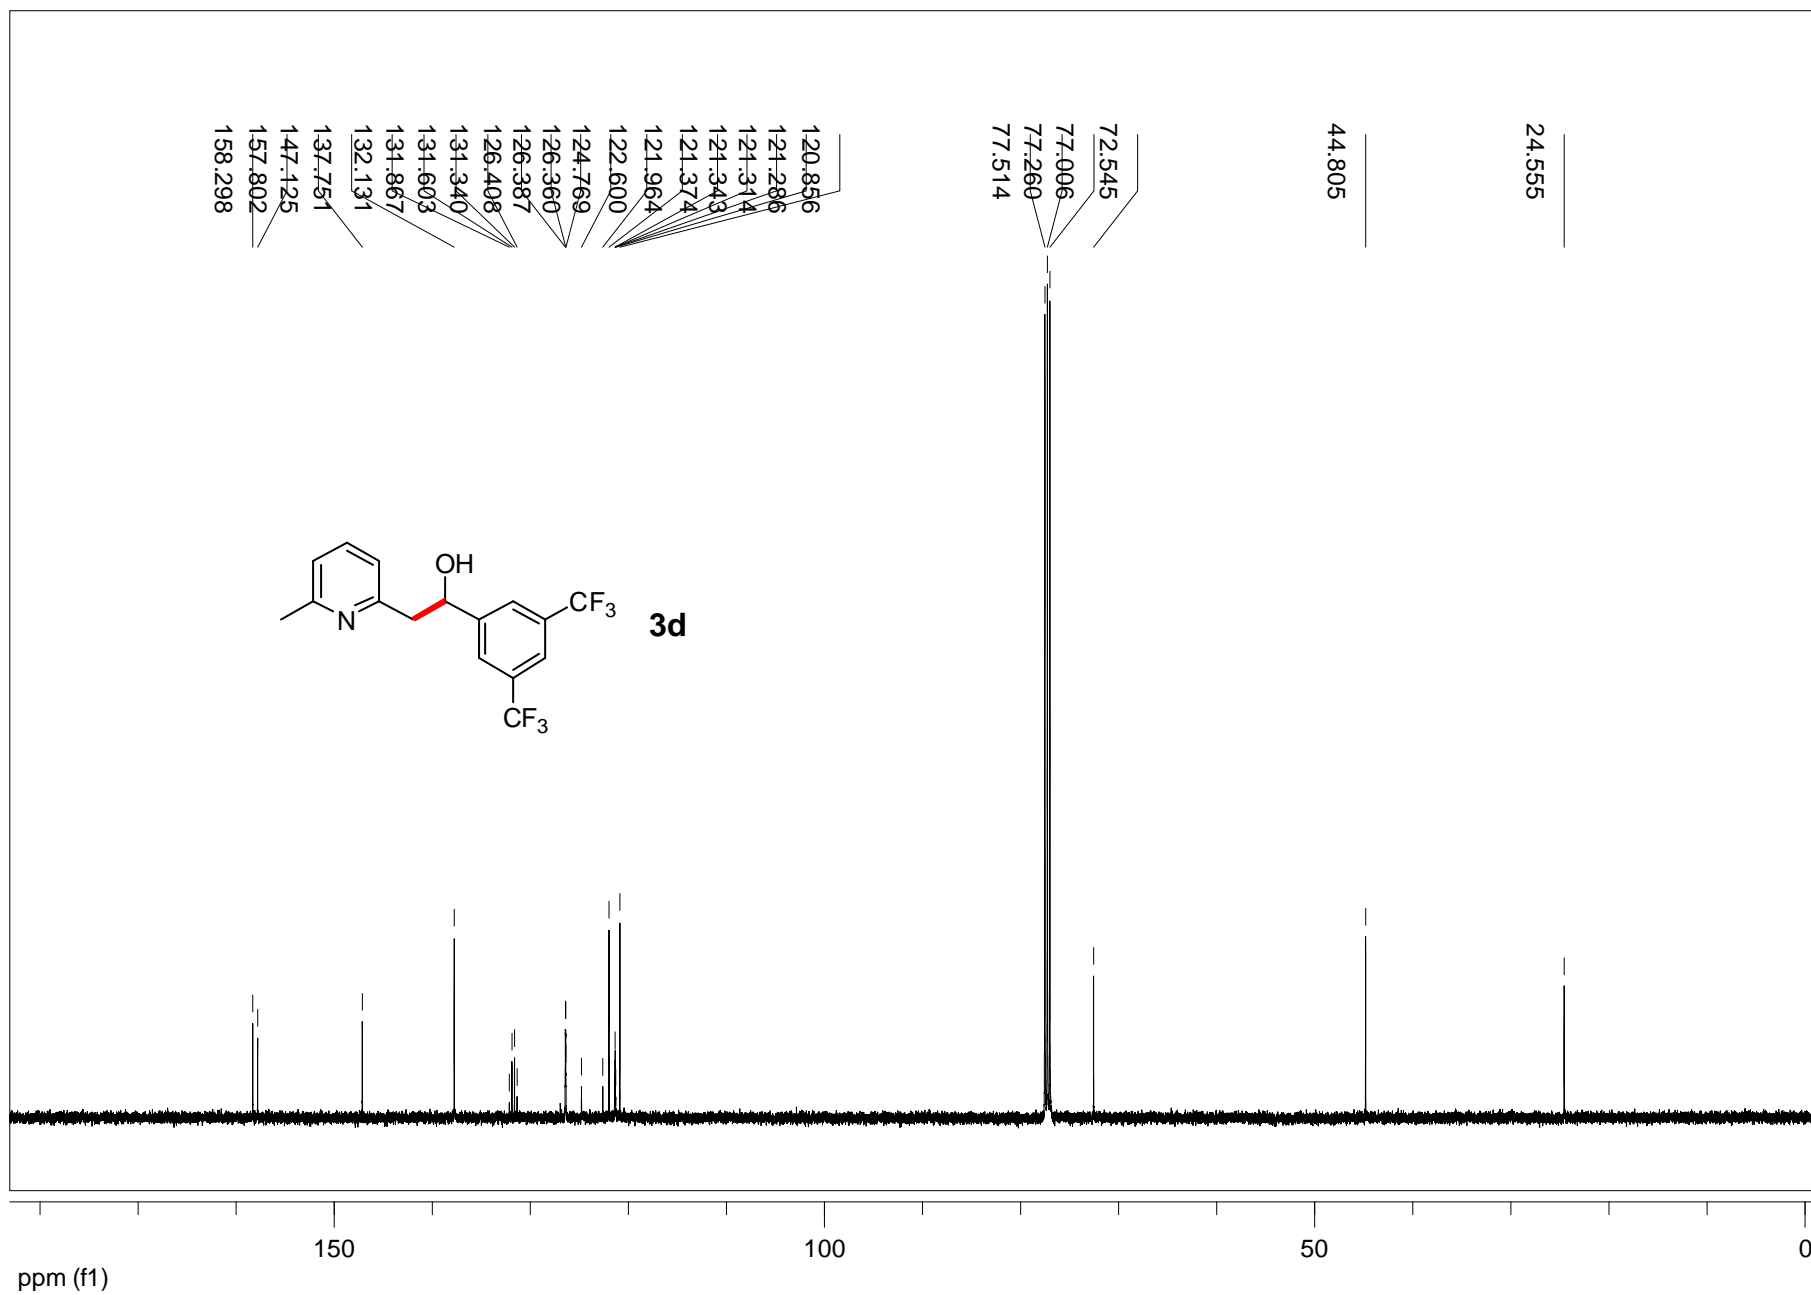



2058 500m

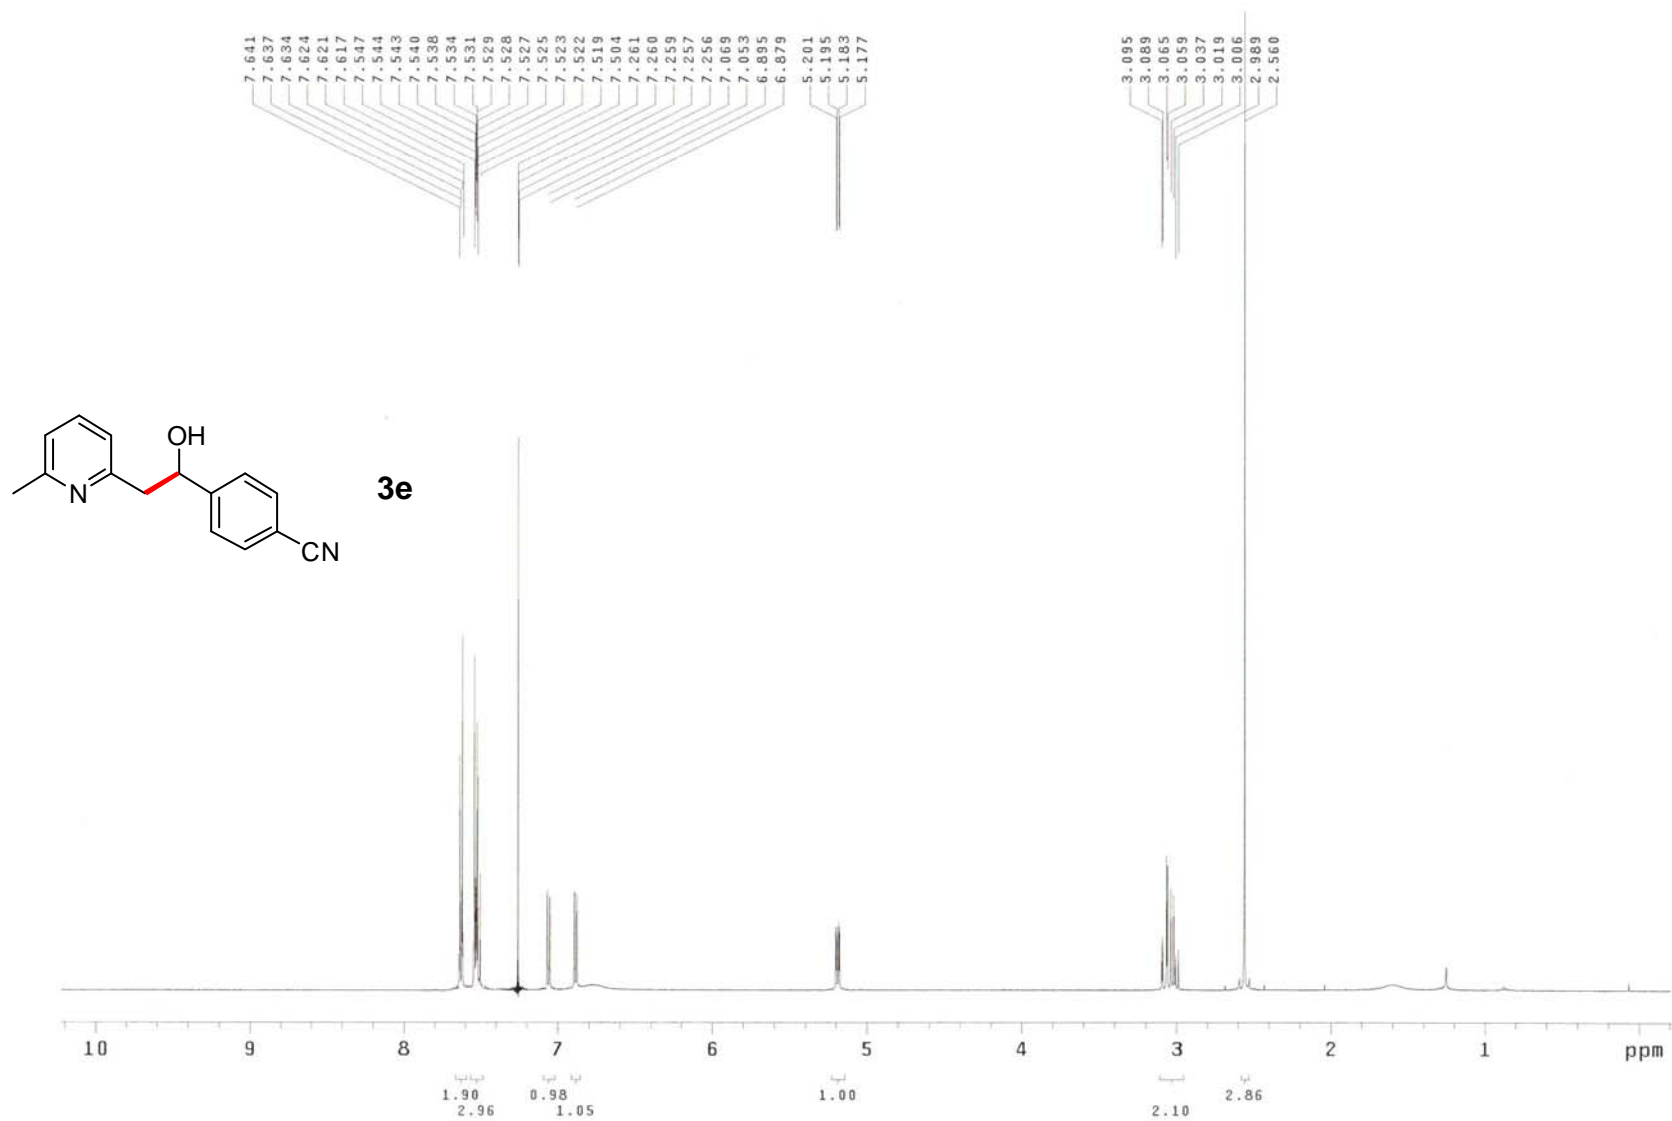

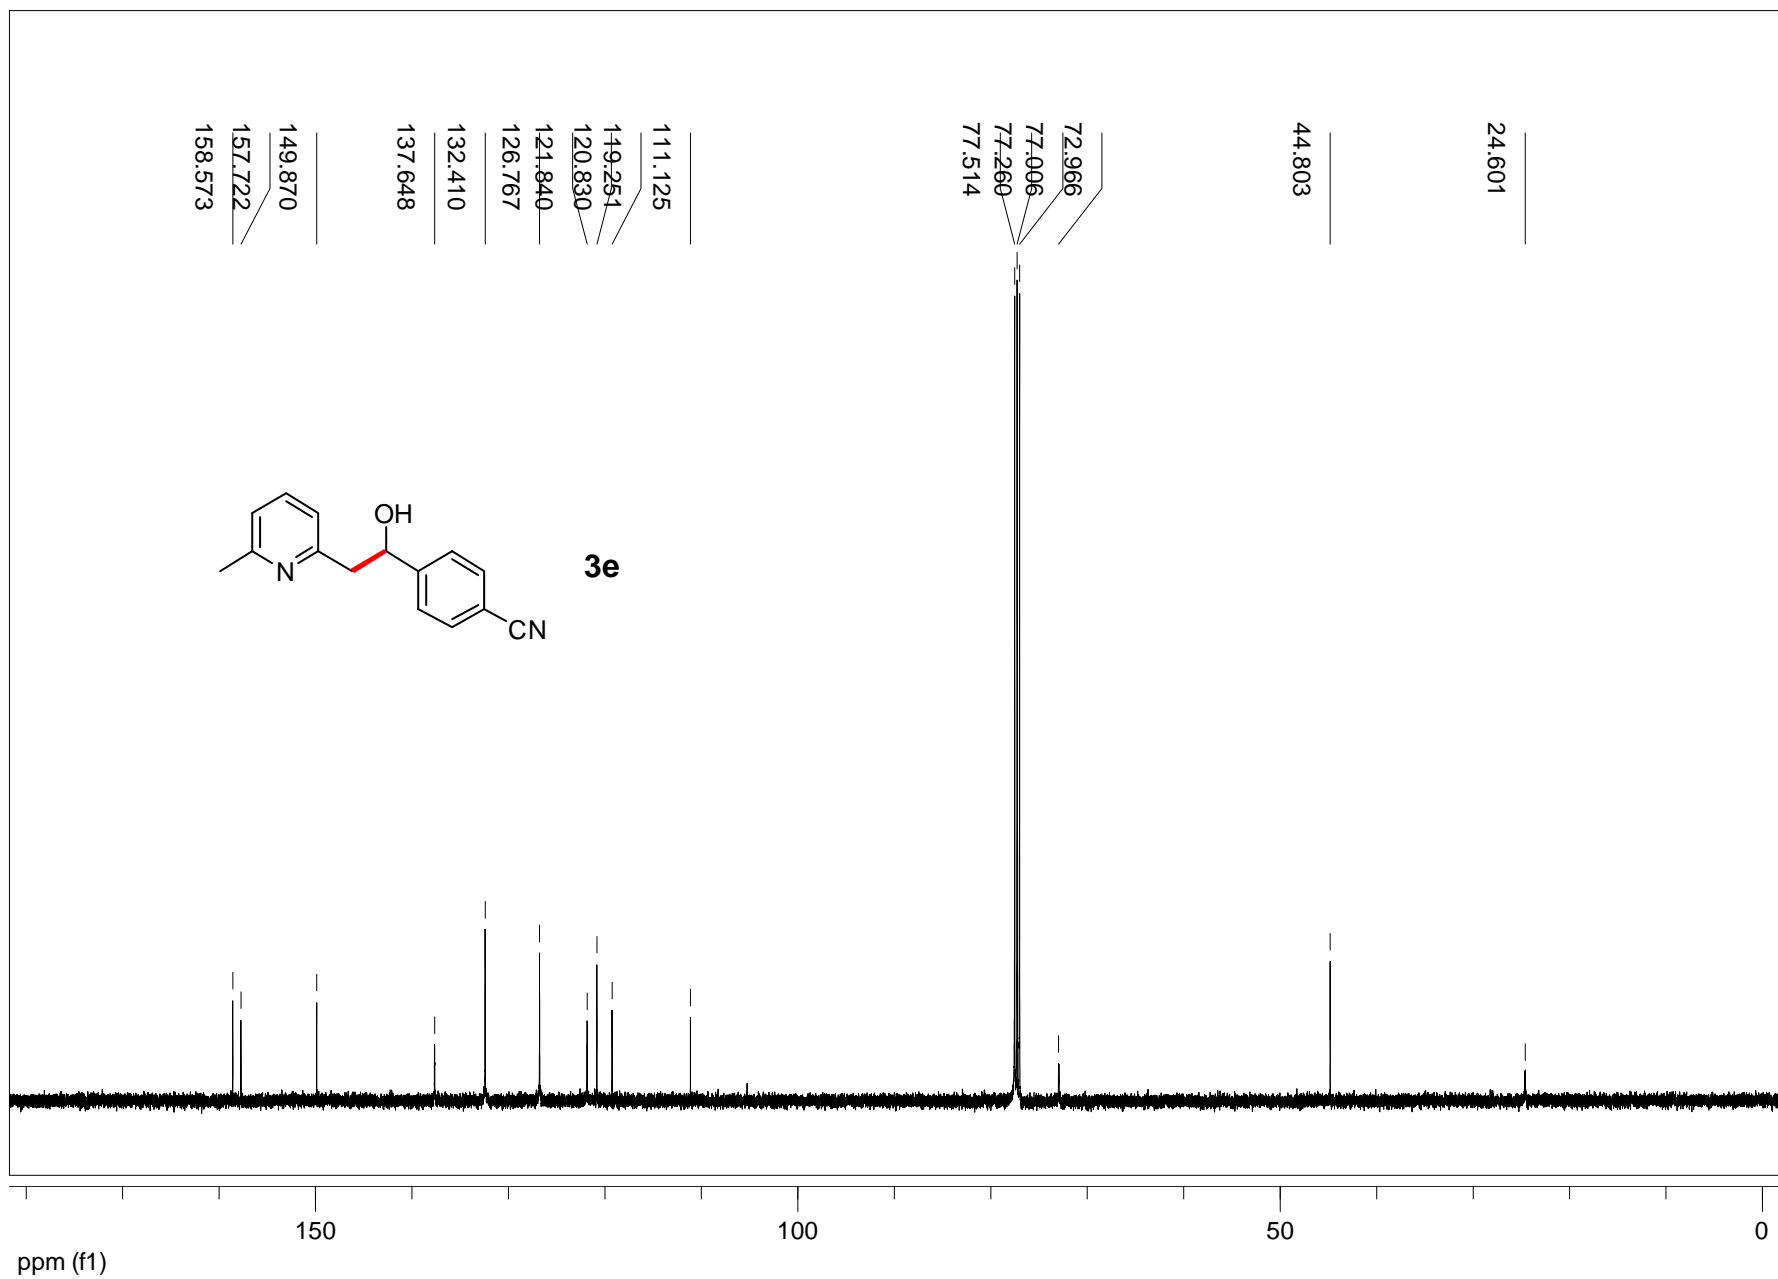

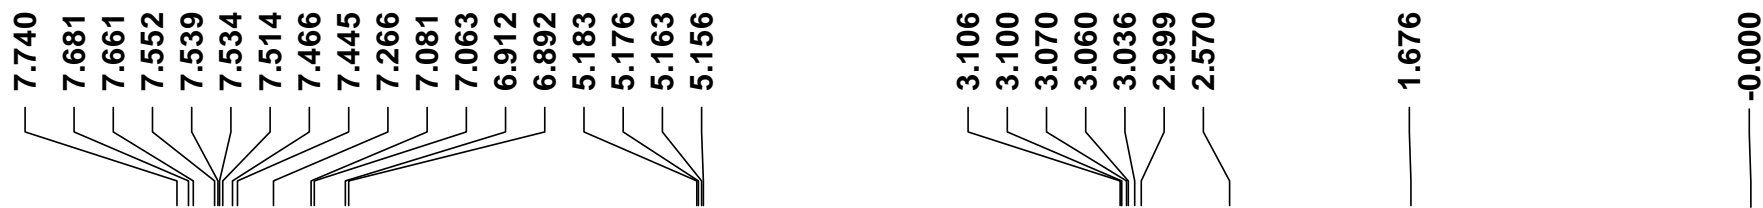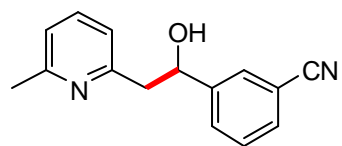

**3f**

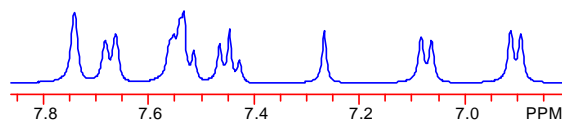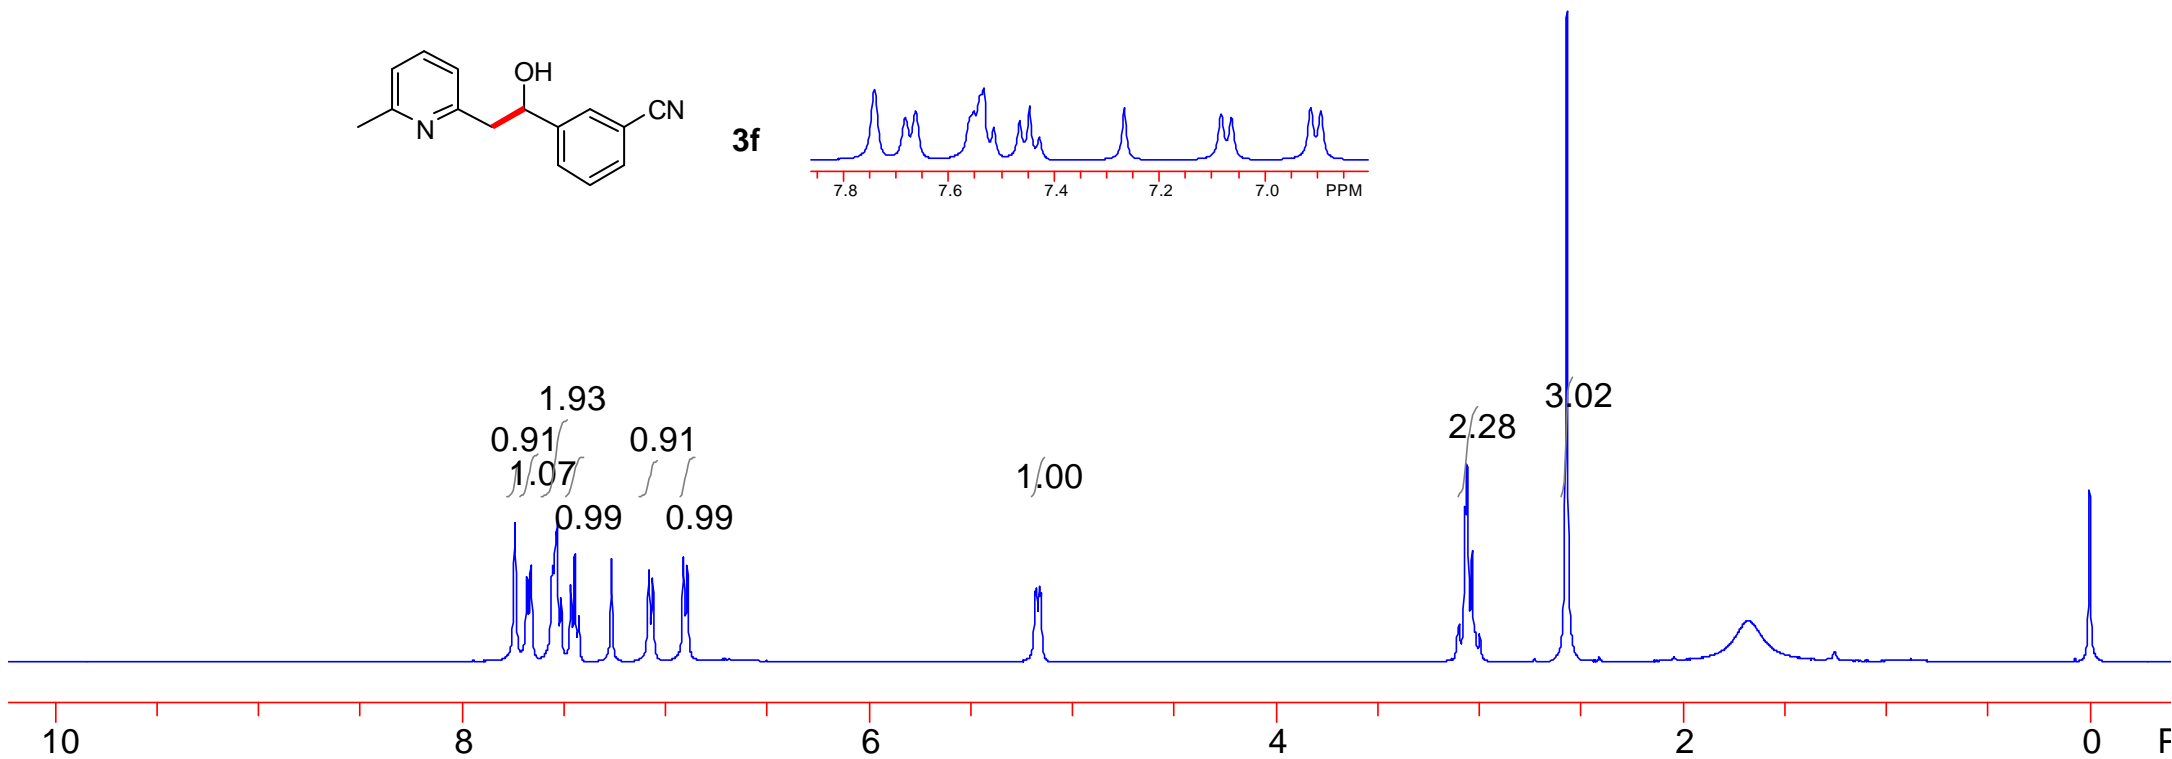

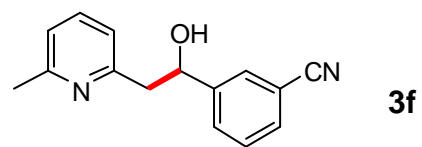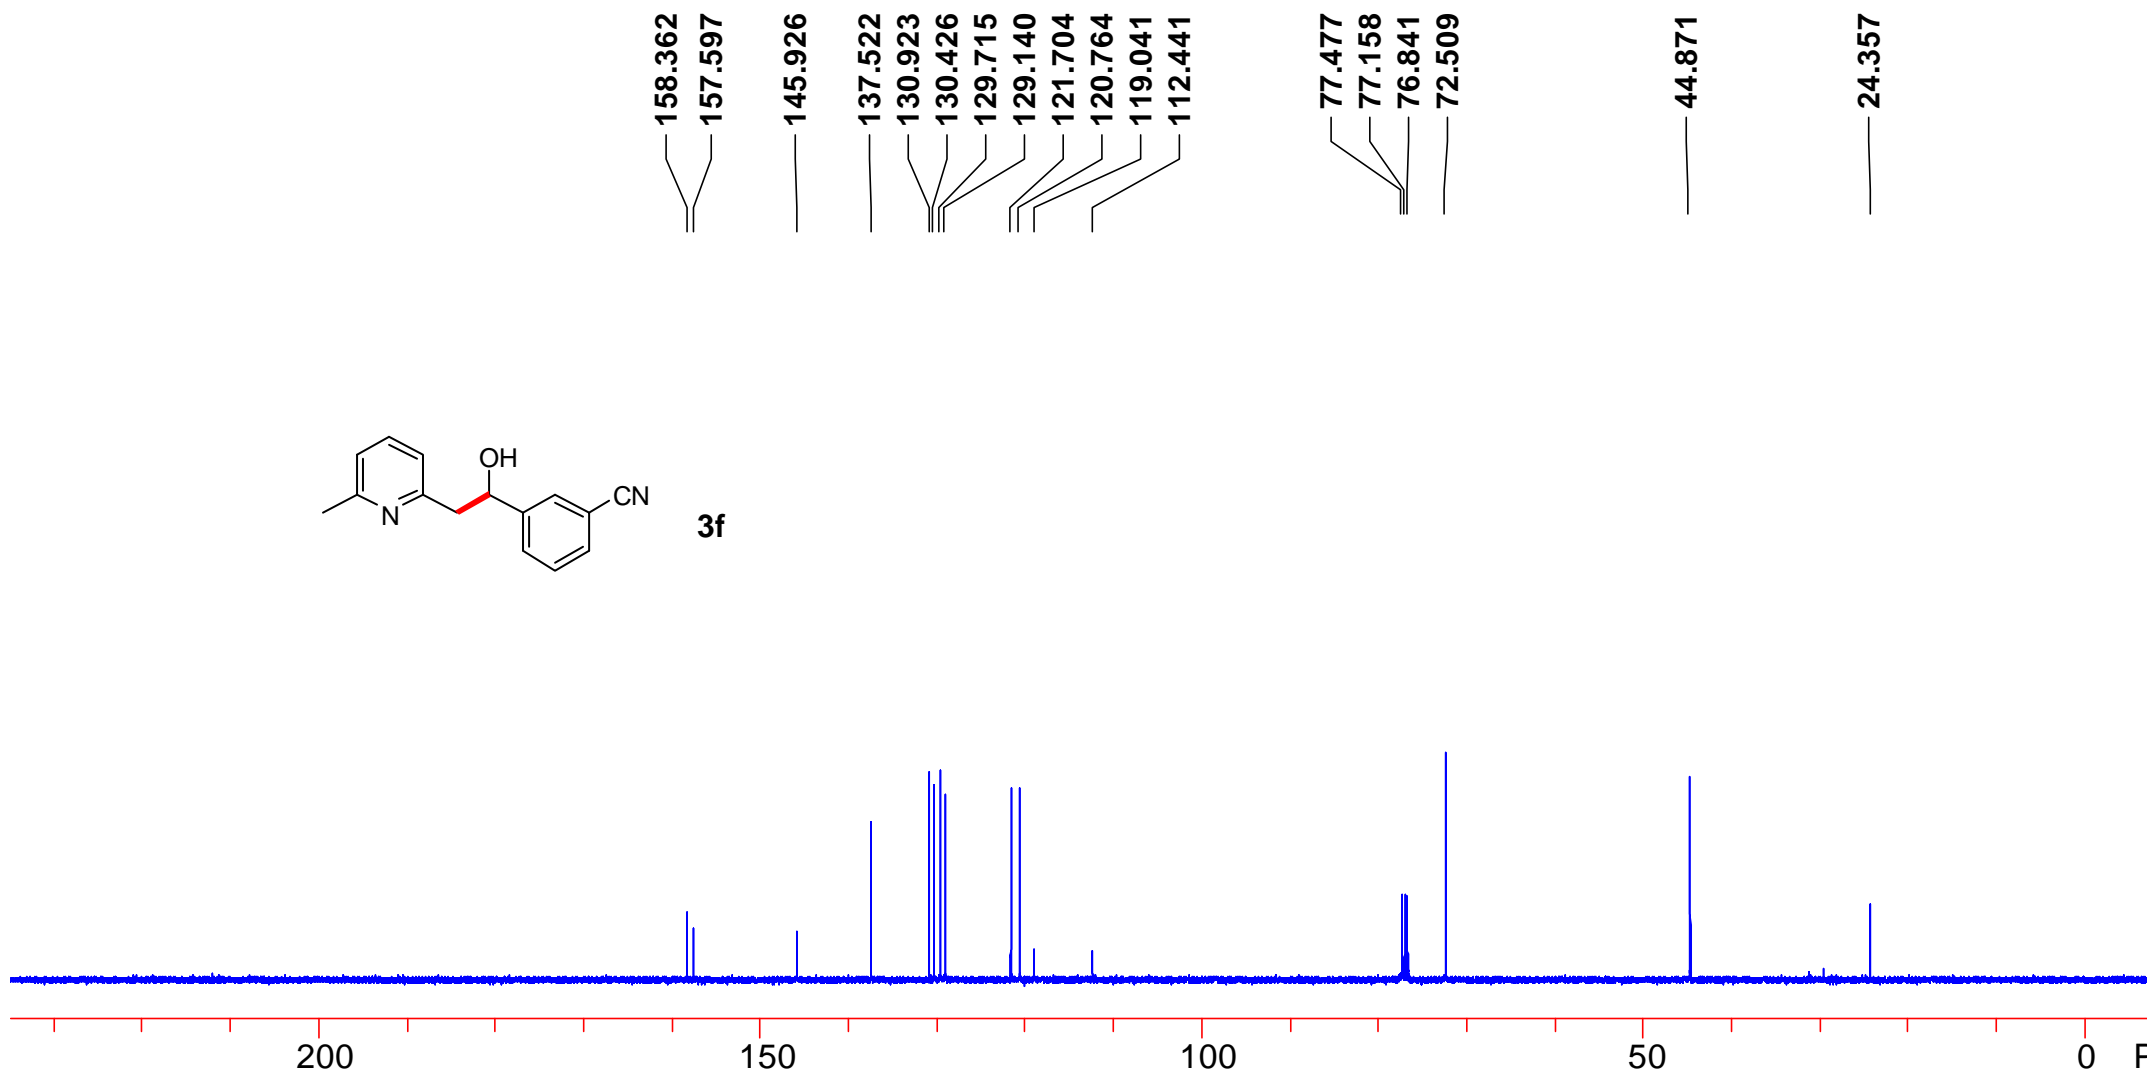

2016 1000

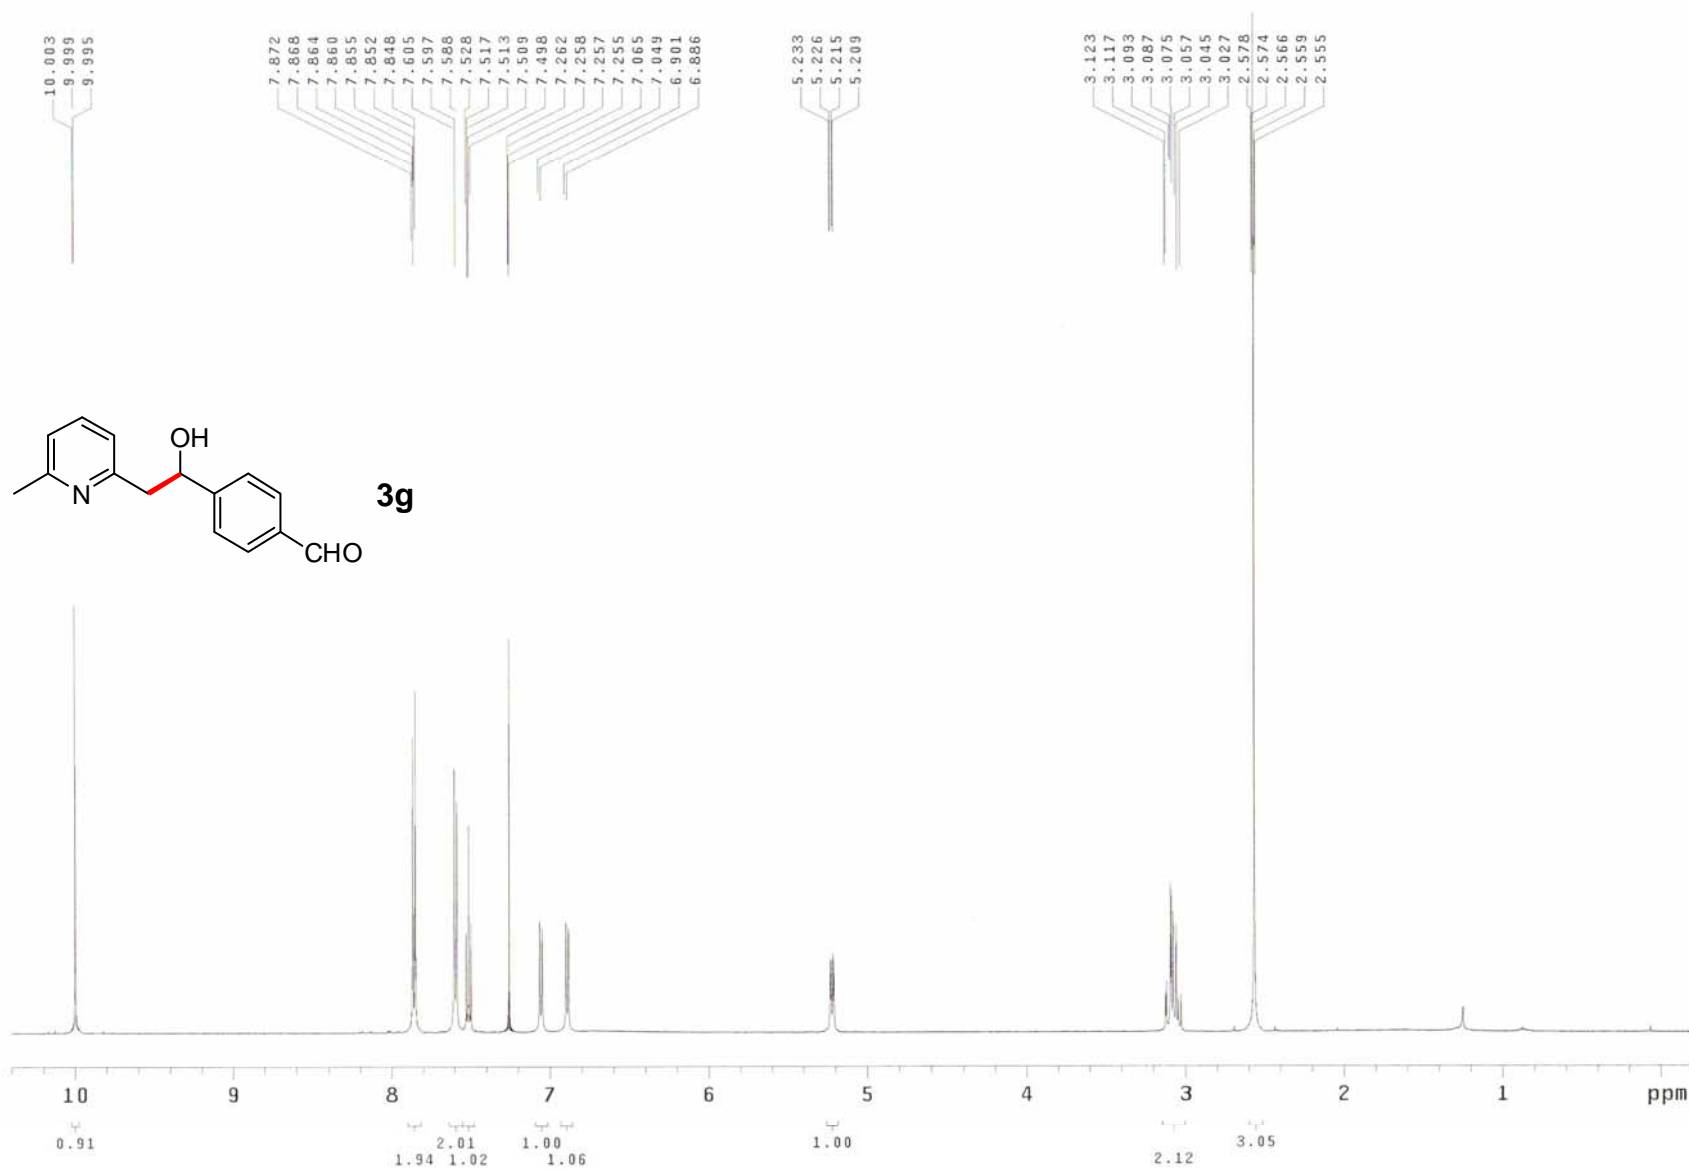

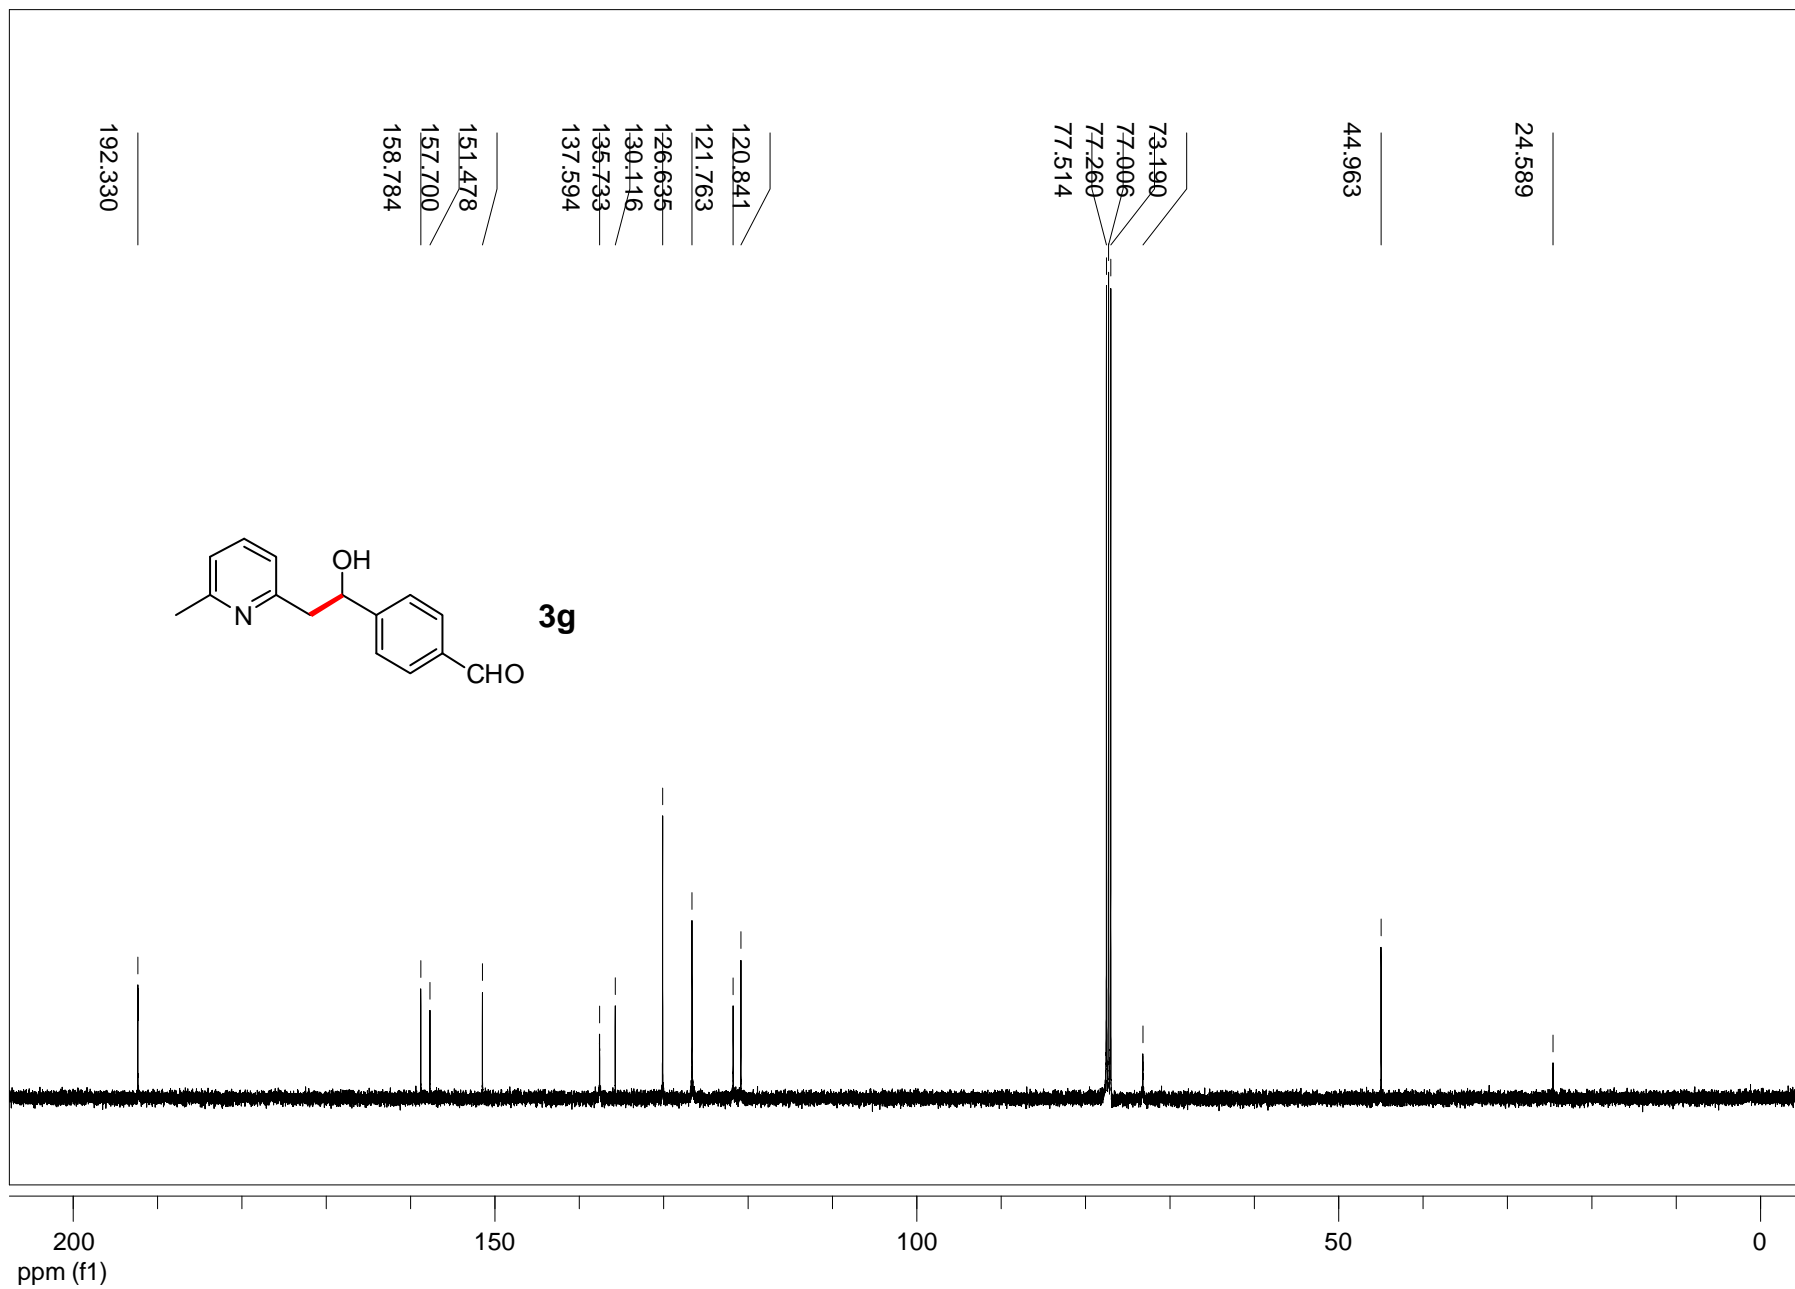

10.530

8.169  
7.680  
7.663  
7.549  
7.528  
7.511  
7.264  
7.151  
7.129  
7.074  
7.056  
6.921  
6.902  
5.139  
5.132  
5.121  
5.113

3.090  
3.055  
3.037  
3.037  
2.999  
2.567

1.601

0.071  
0.000

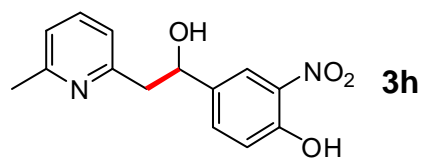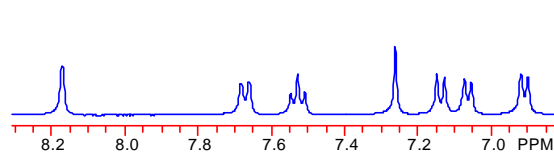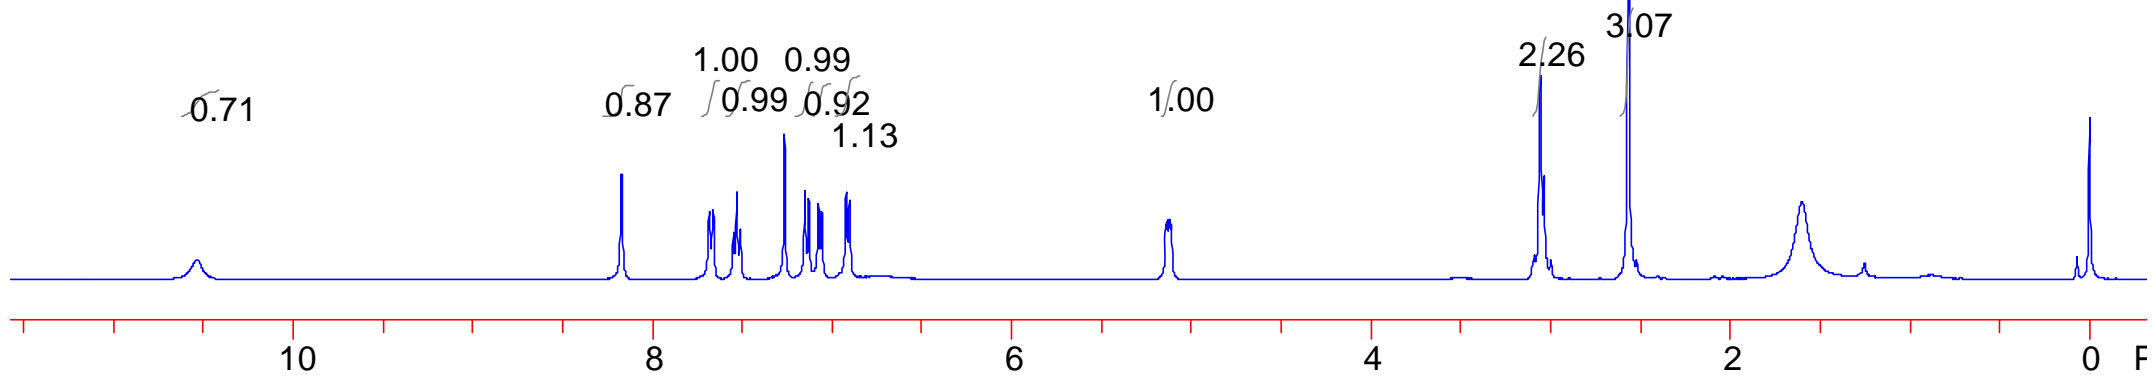

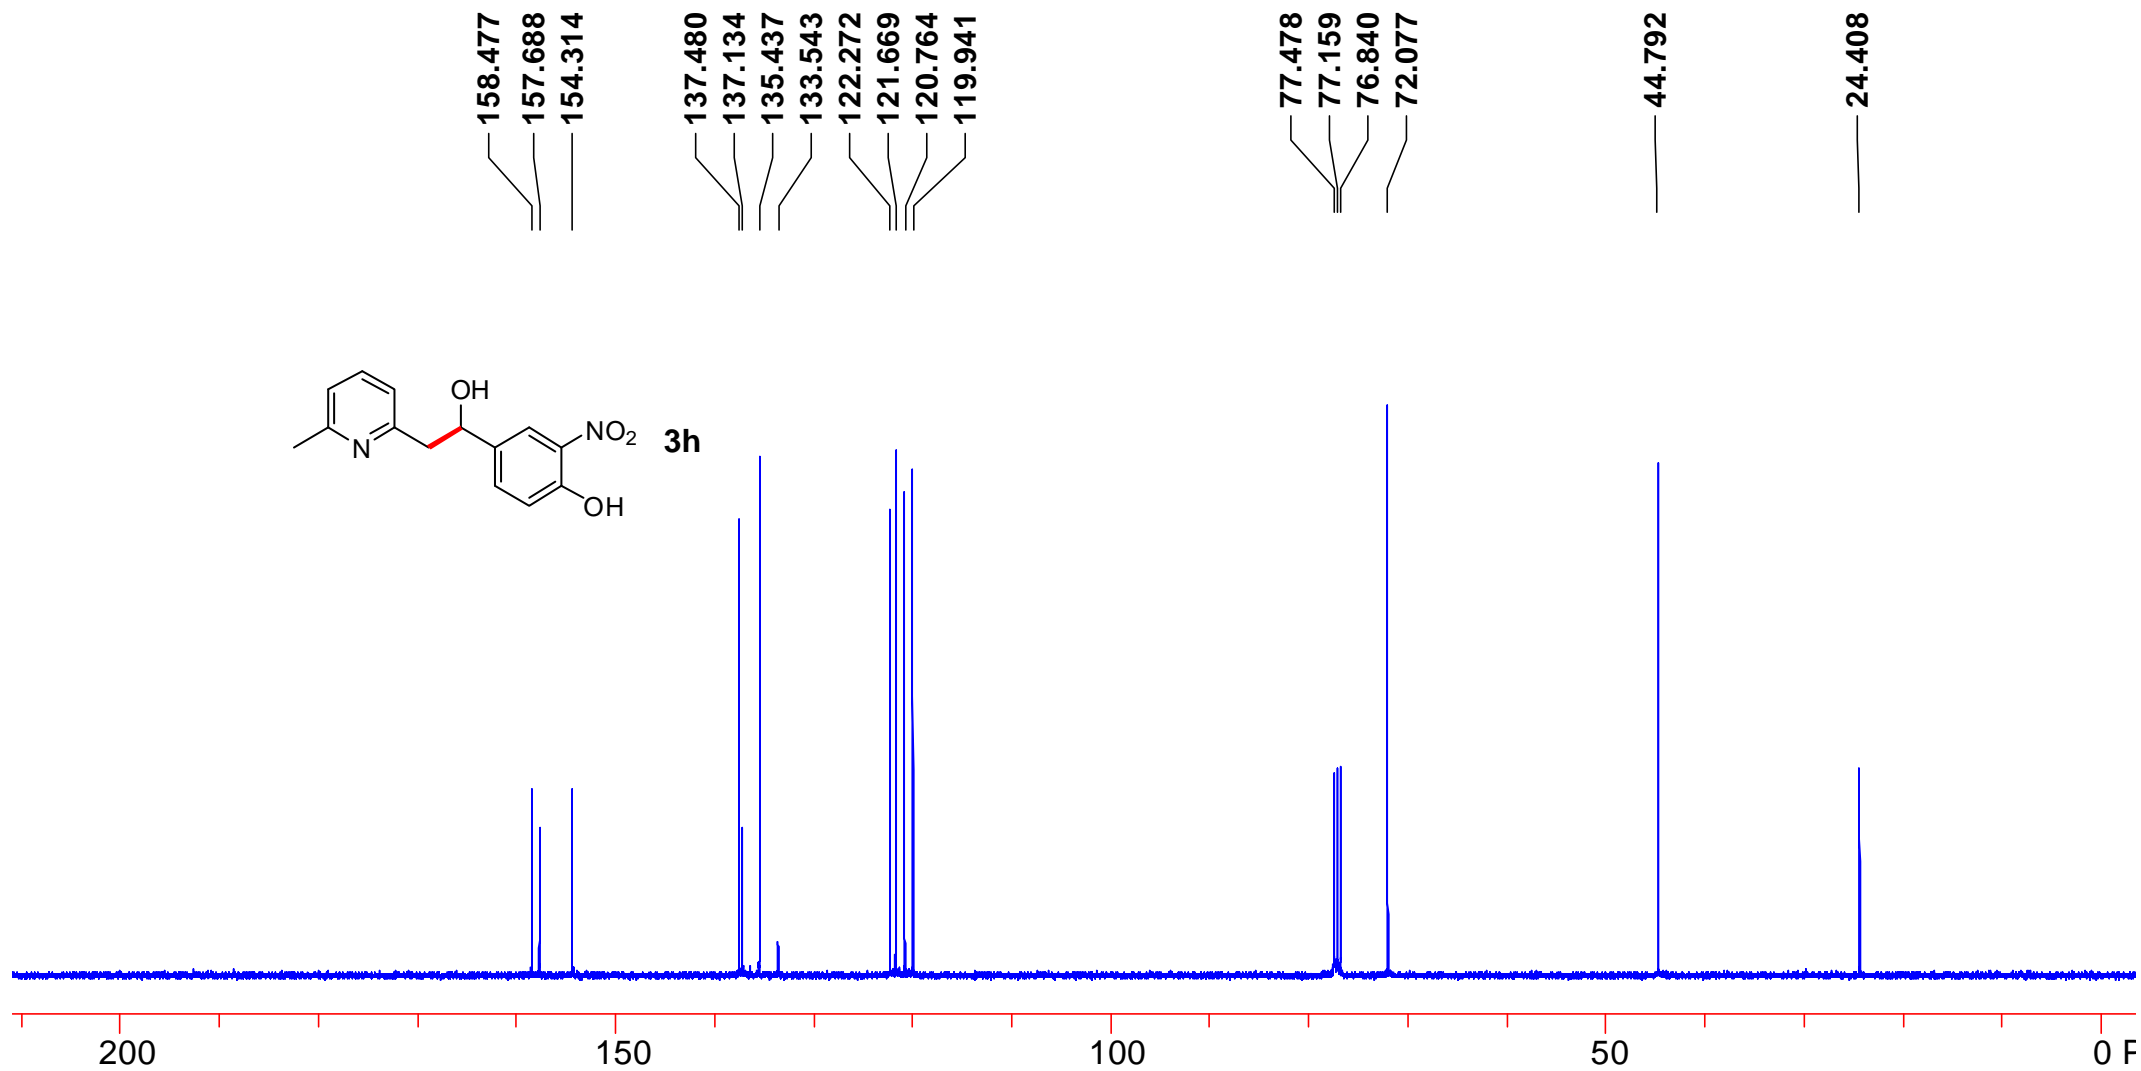



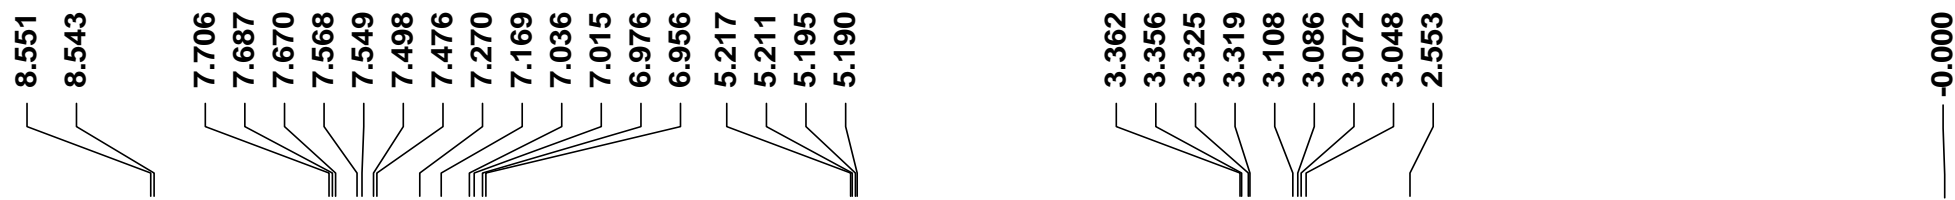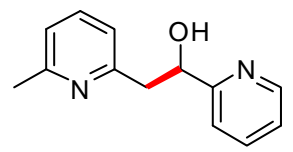

3i

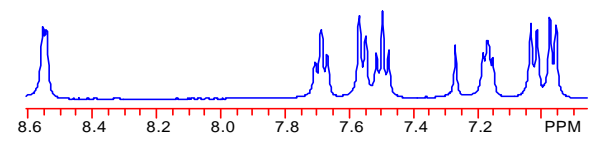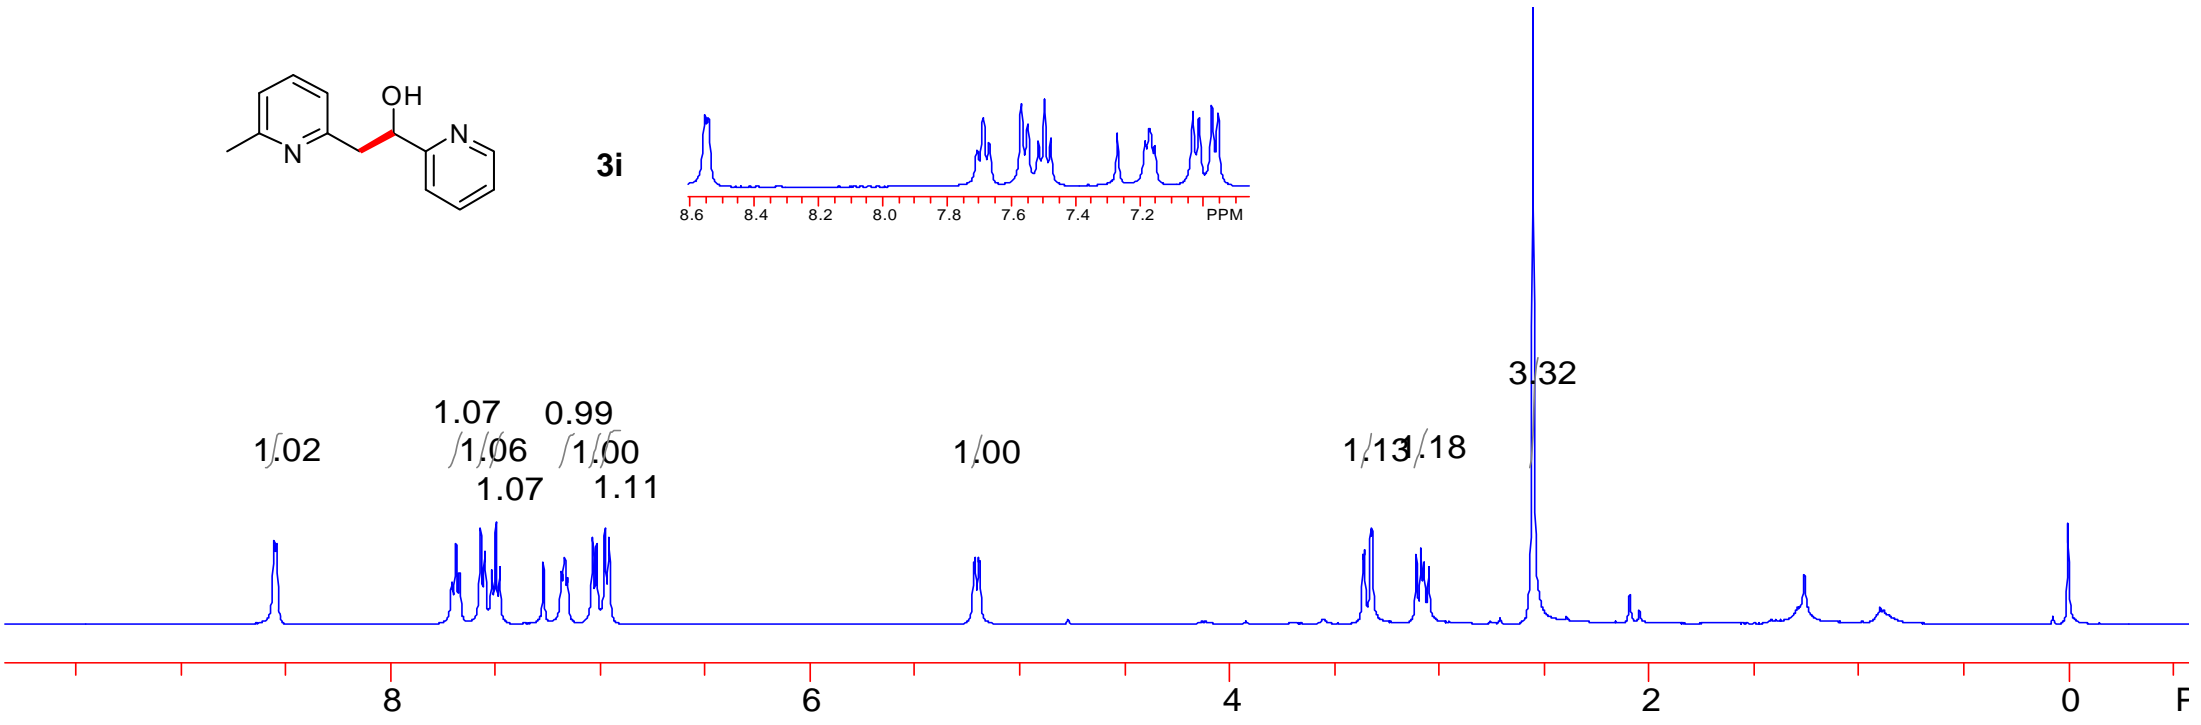

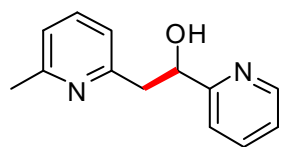

**3i**

163.016

159.022

157.394

148.512

137.159

136.731

122.113

121.277

120.945

120.408

77.478

77.160

76.842

73.882

44.065

24.370

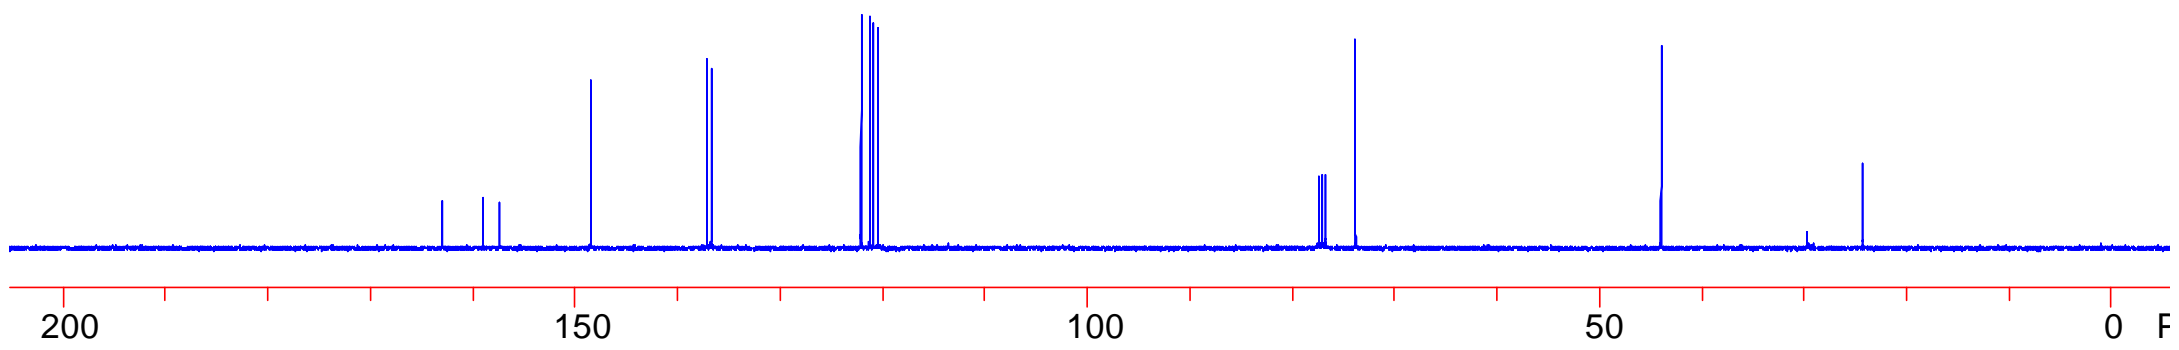

2056 130m

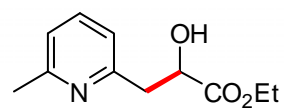

**3j**

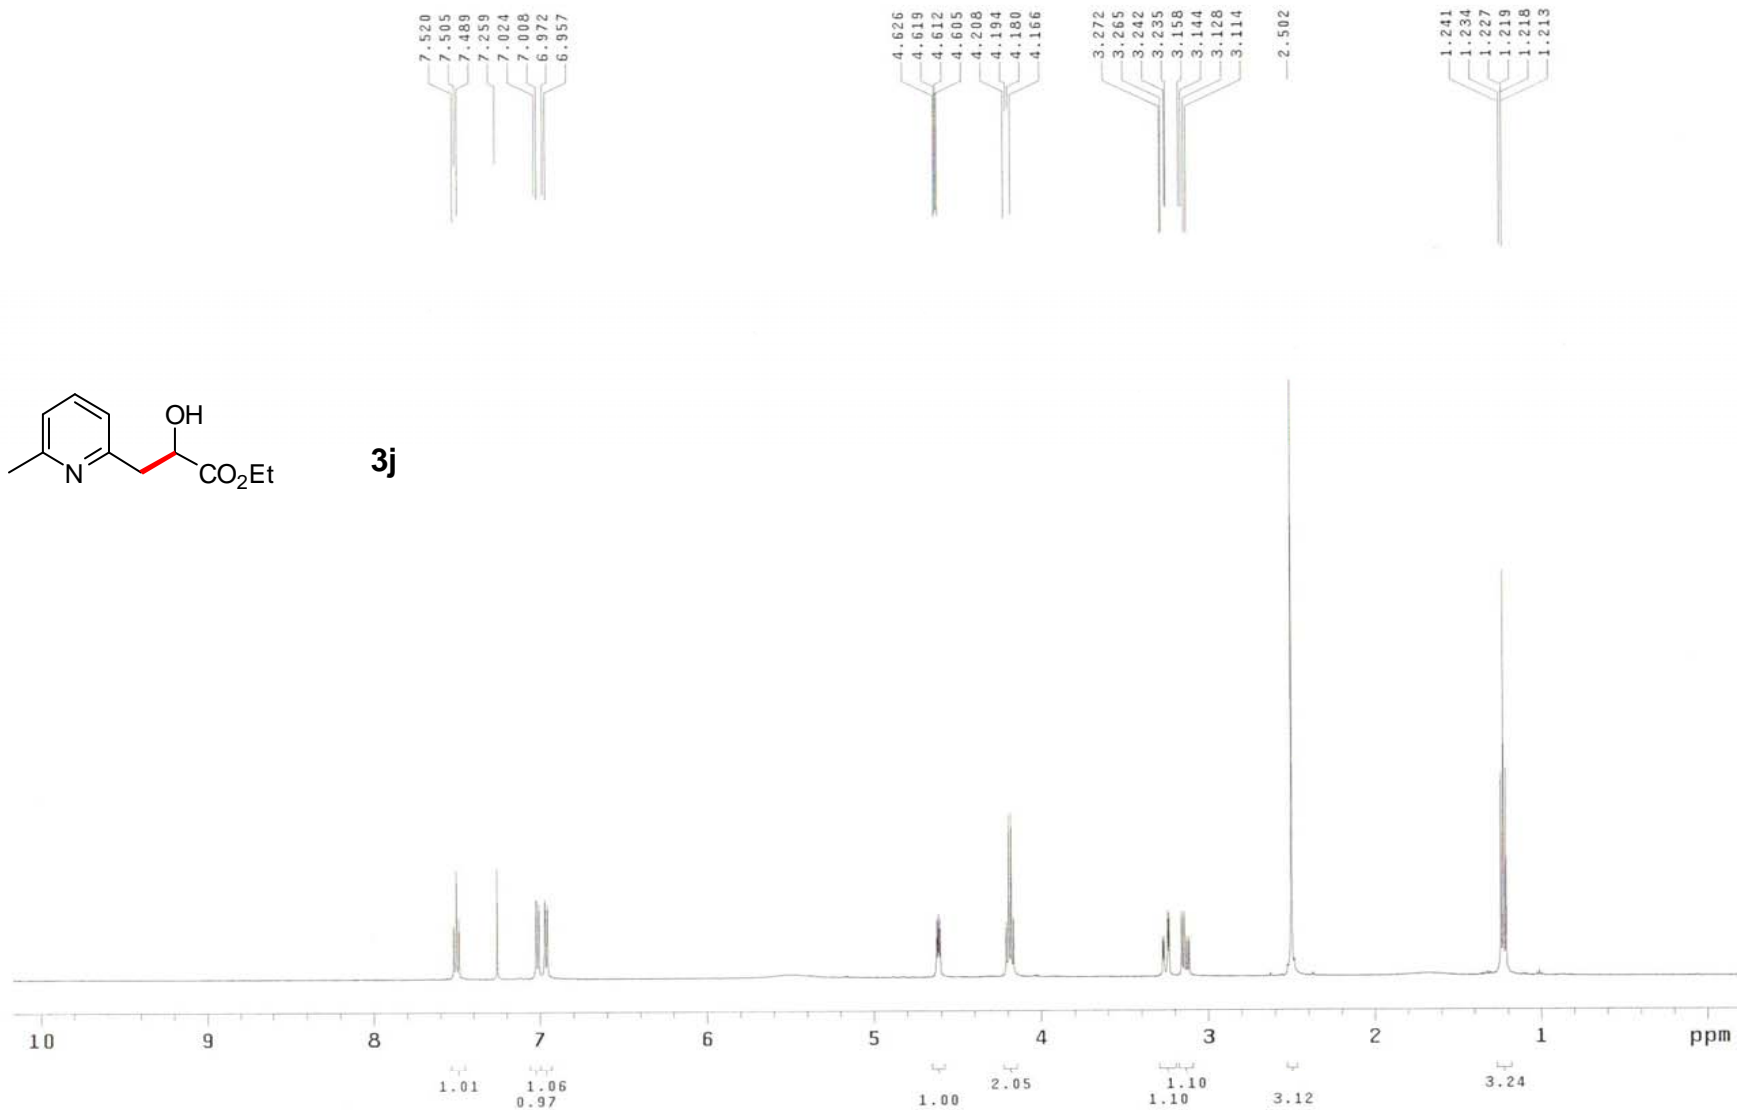

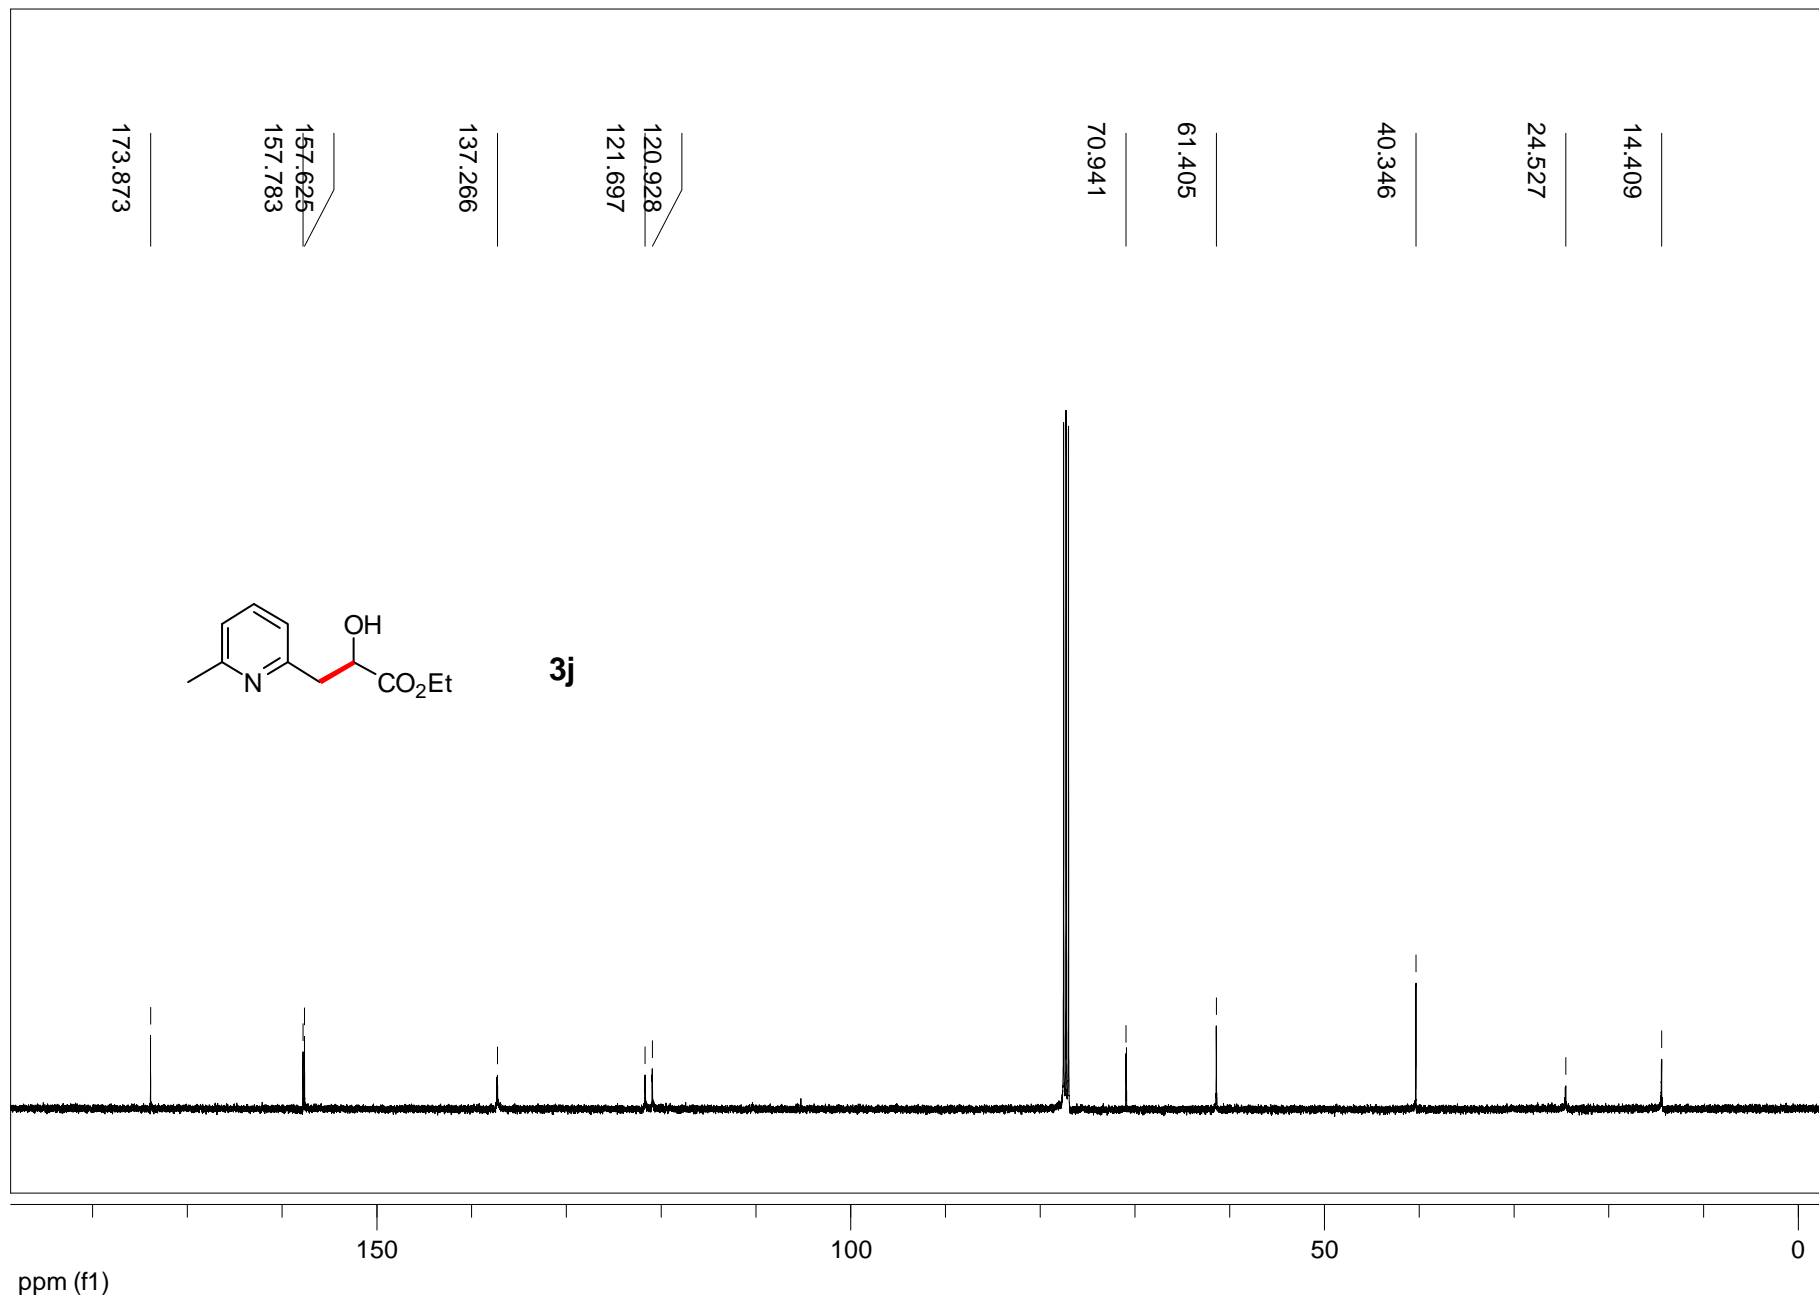

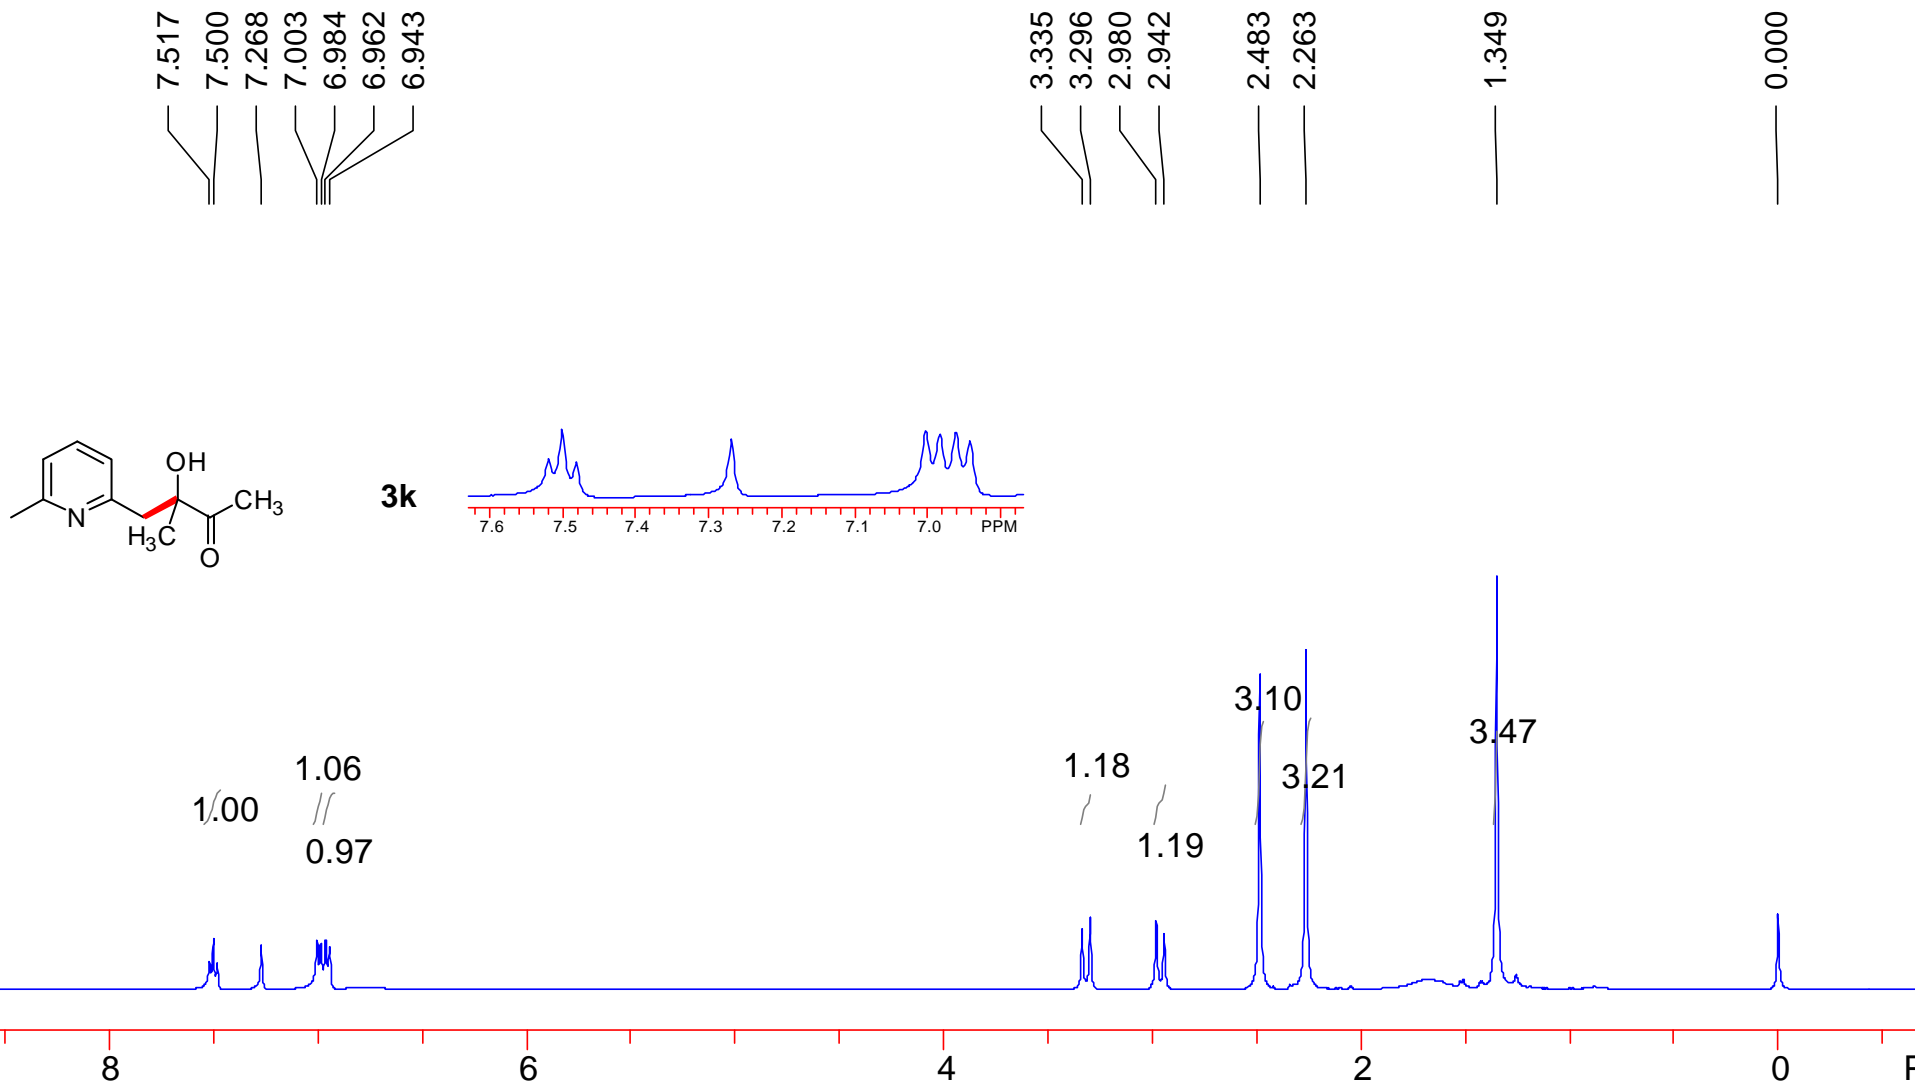

215.059

158.058  
157.121

137.400  
121.419  
121.365

80.056  
77.478  
77.364  
77.349  
77.160  
77.093  
77.075  
76.841

44.496

25.811  
25.530  
24.236

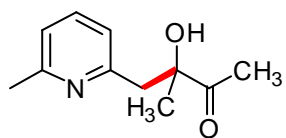

**3k**

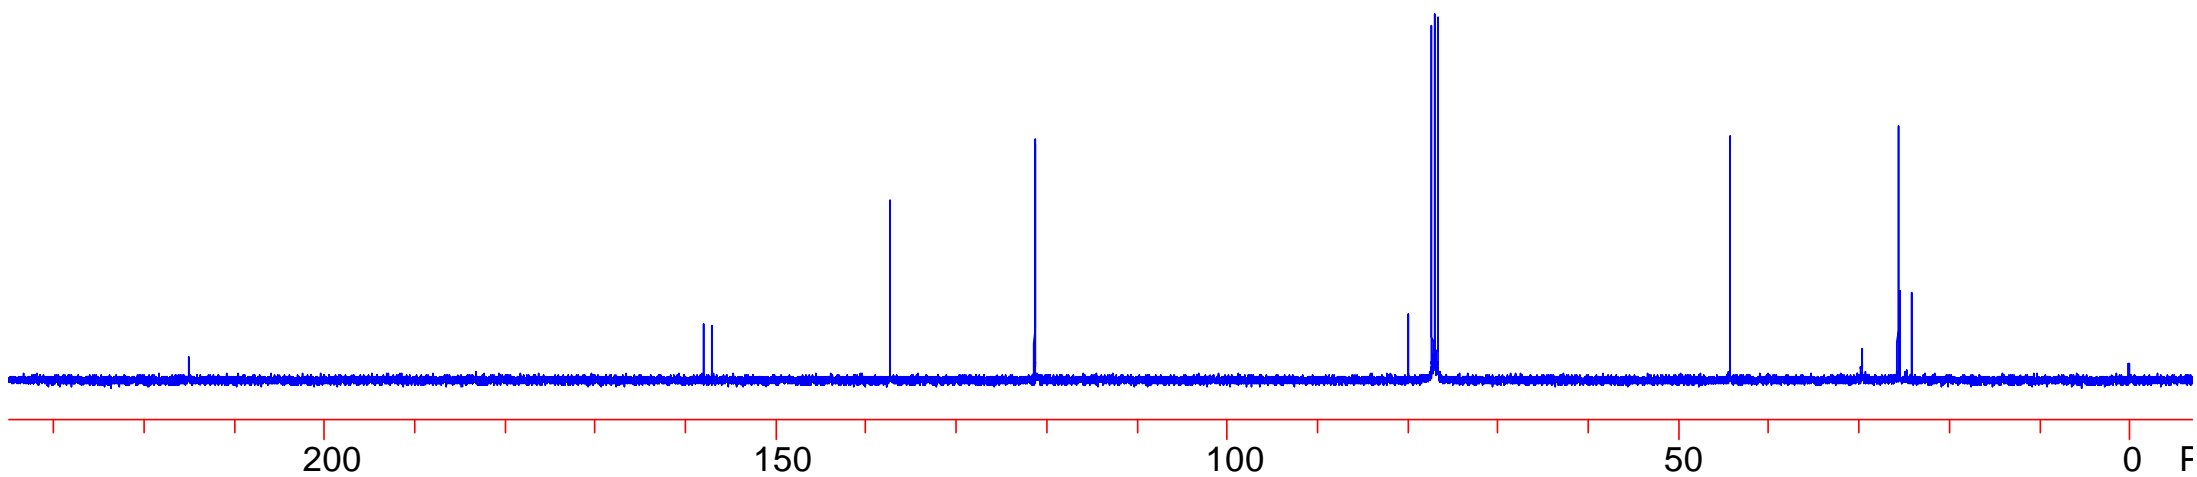

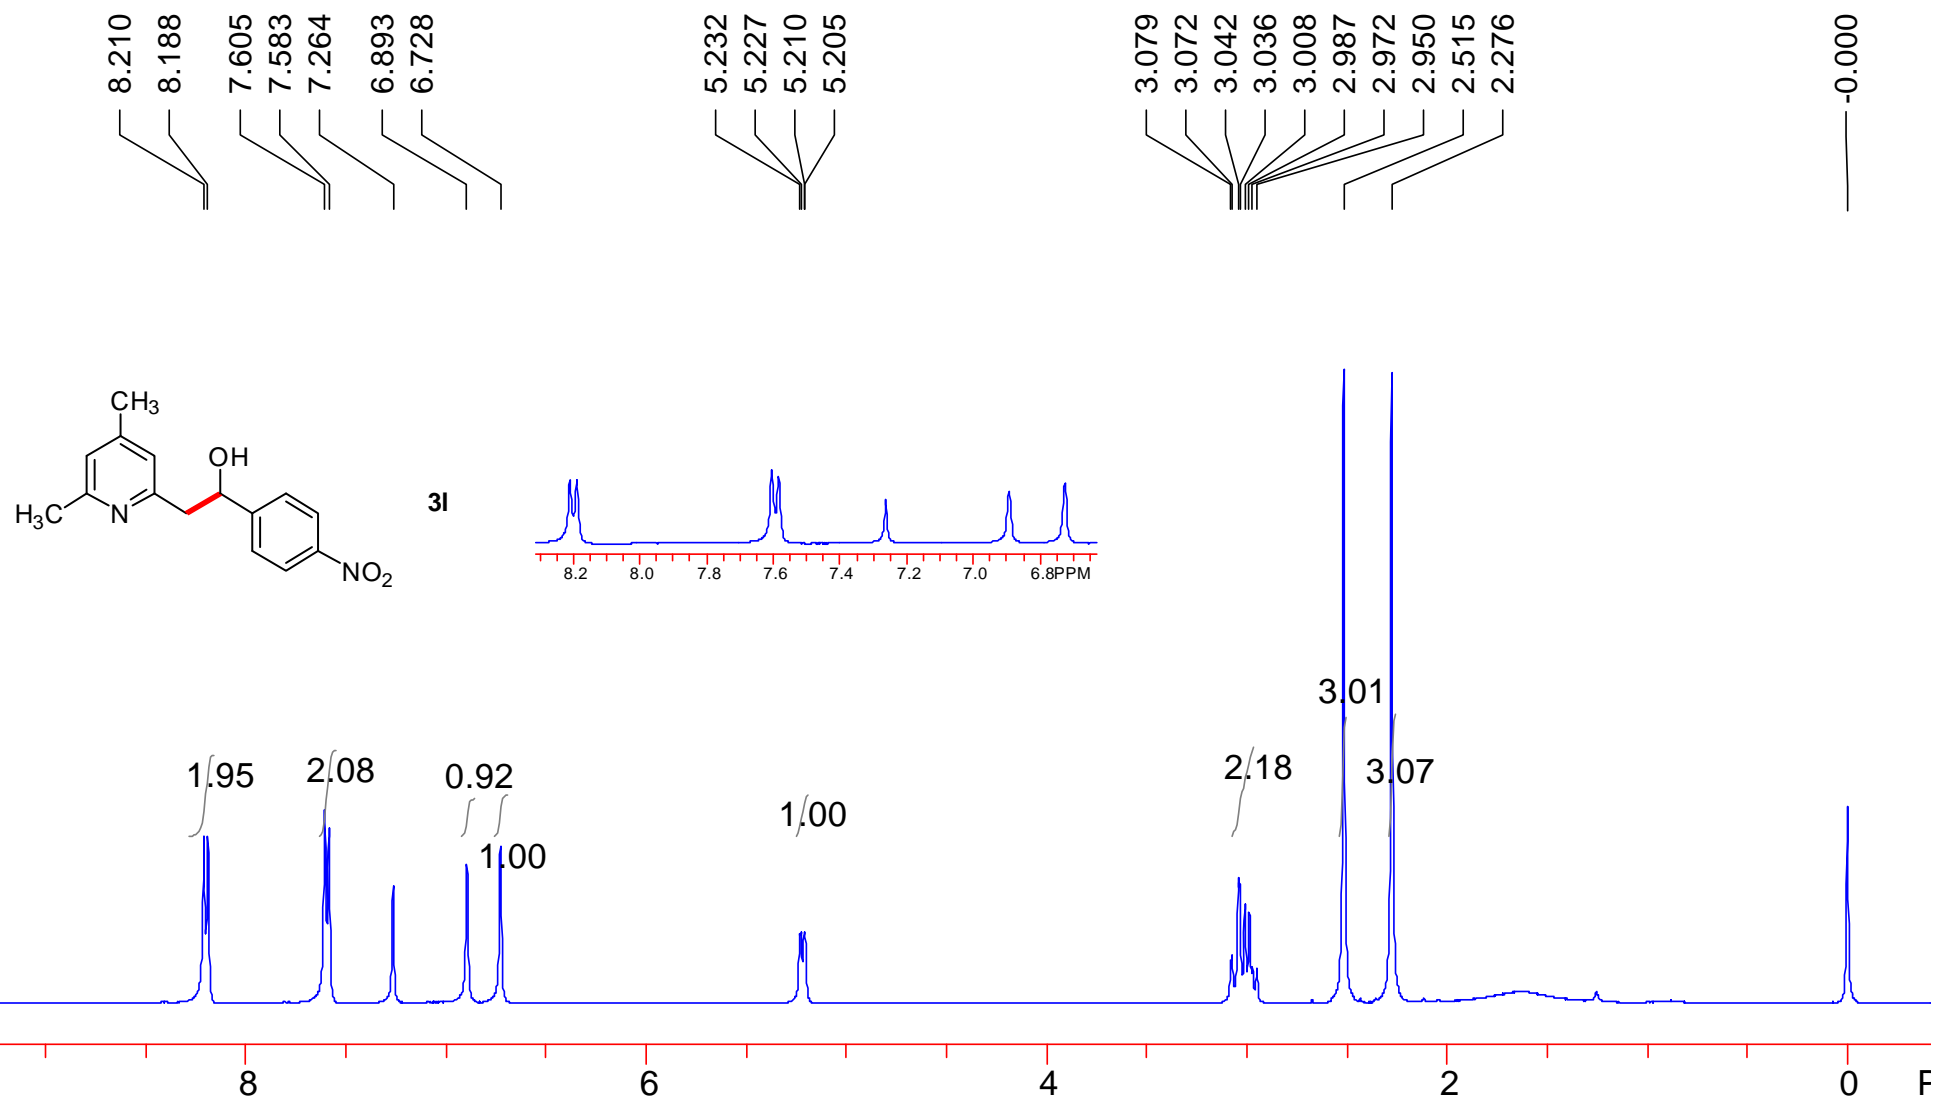

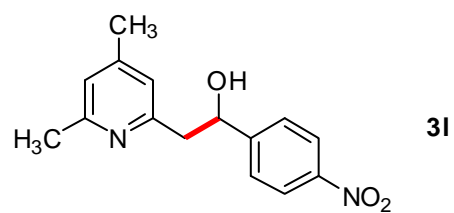

158.082  
157.263  
152.004  
148.773  
147.242

126.711  
123.600  
122.651  
121.713

77.478  
77.158  
76.842  
72.708

44.549

24.150  
20.965

200

150

100

50

0 F



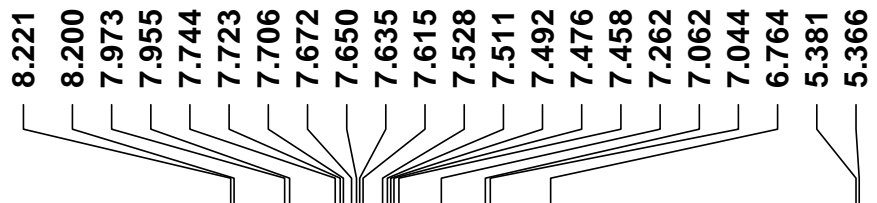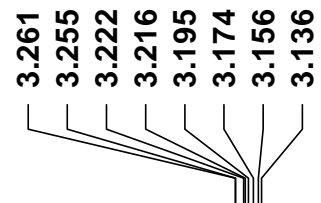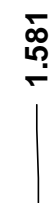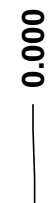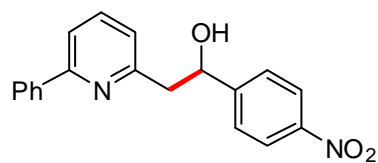

3m

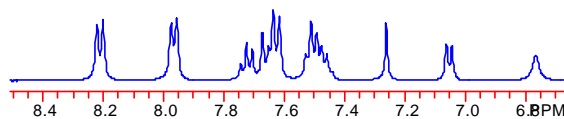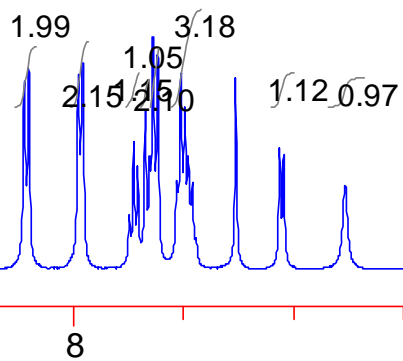

1.00

2.15

8

6

4

2

0 F

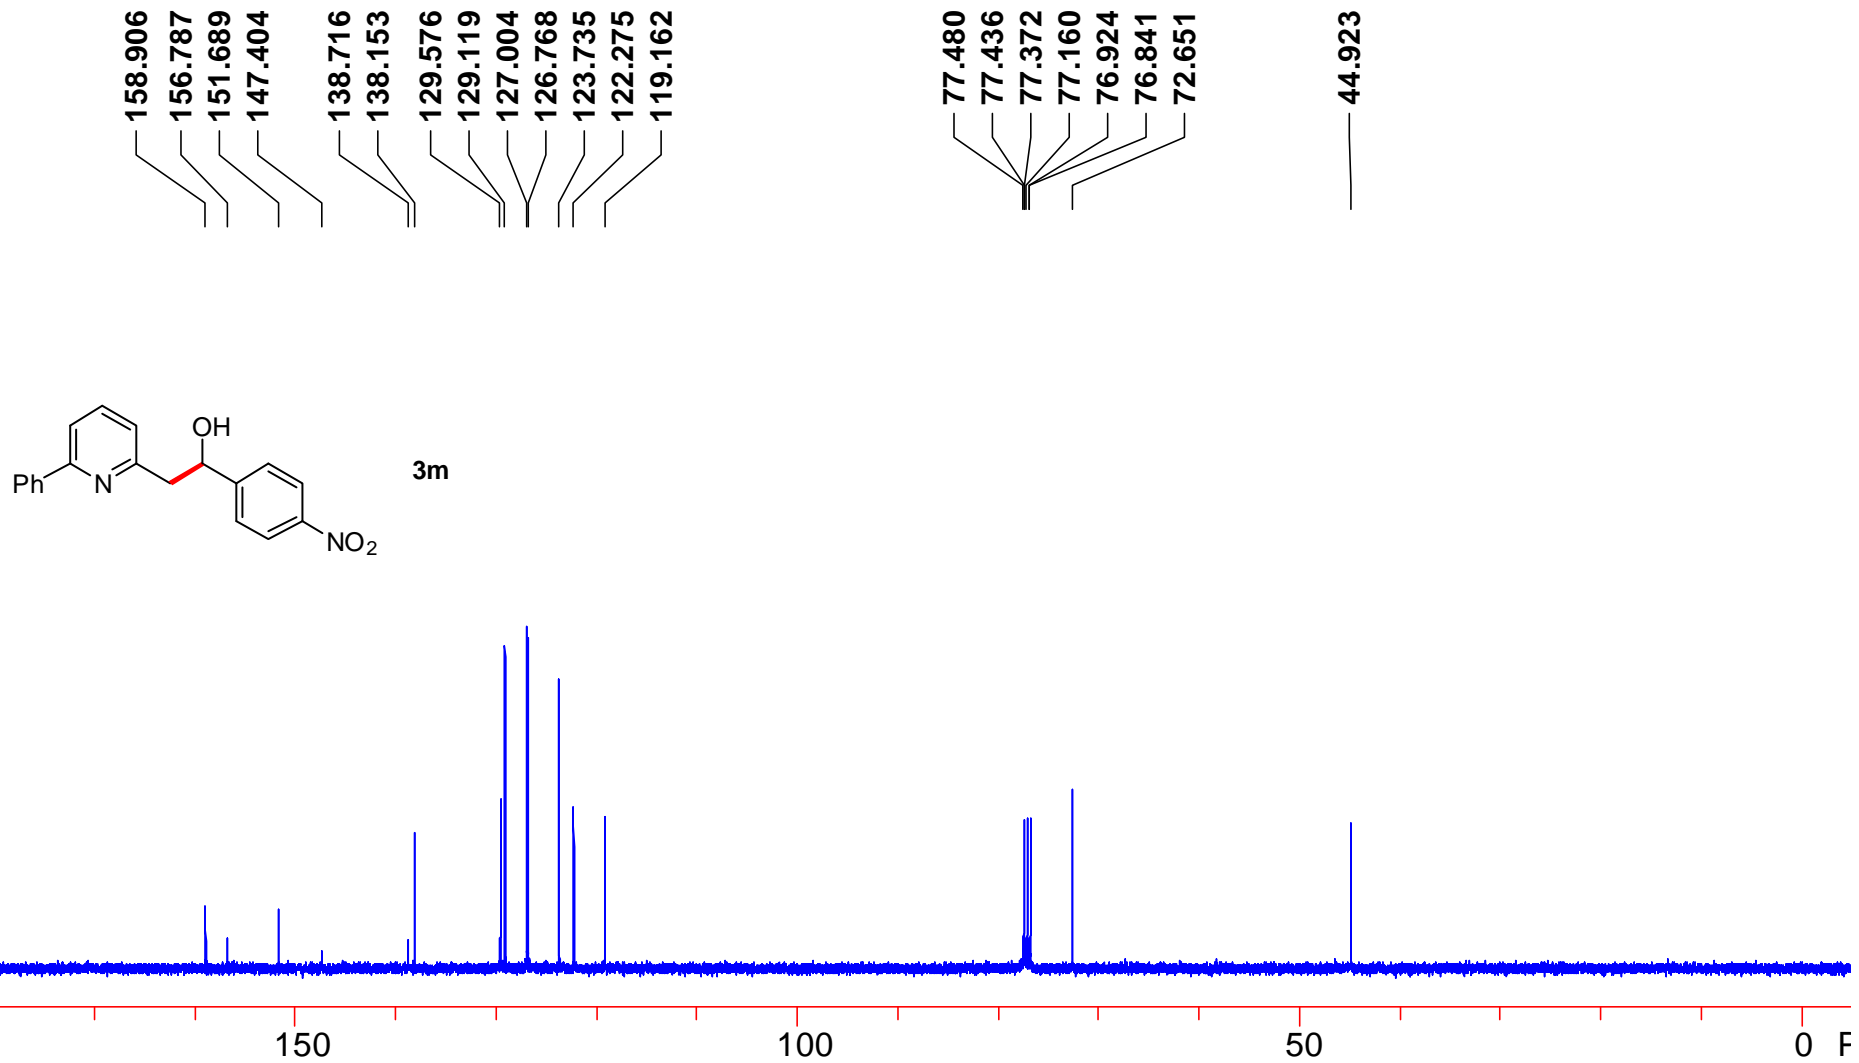

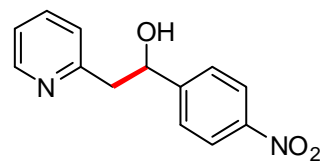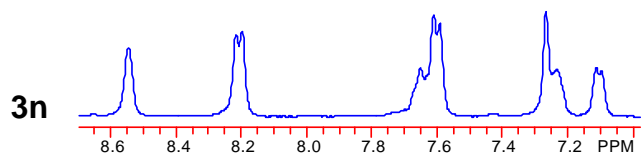

8.544

8.215

8.195

7.651

7.610

7.592

7.265

7.233

7.113

7.097

6.424

5.301

5.282

3.188

3.152

3.128

3.107

3.069

1.611

-0.000

1.14

2.07

2.14

1.08

0.91

1.09

0.80

1.00

2.21

8

6

4

2

0

F

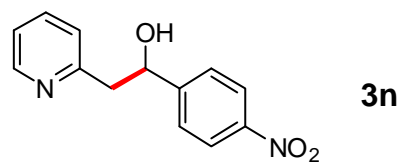

159.026

151.646

148.676

147.300

137.307

126.749

123.947

123.709

122.234

77.479

77.160

76.841

72.616

44.941

150

100

50

0F

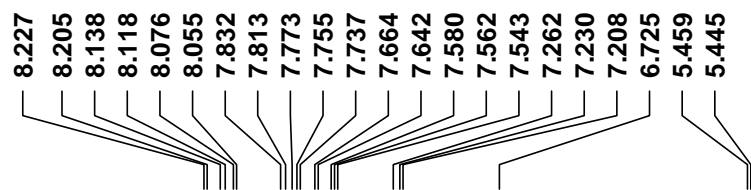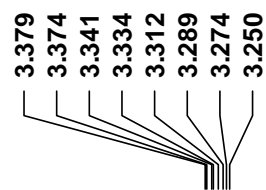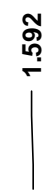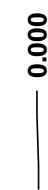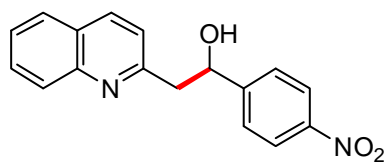

3o

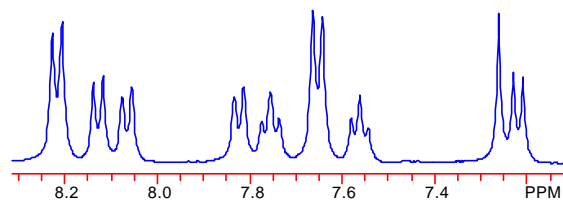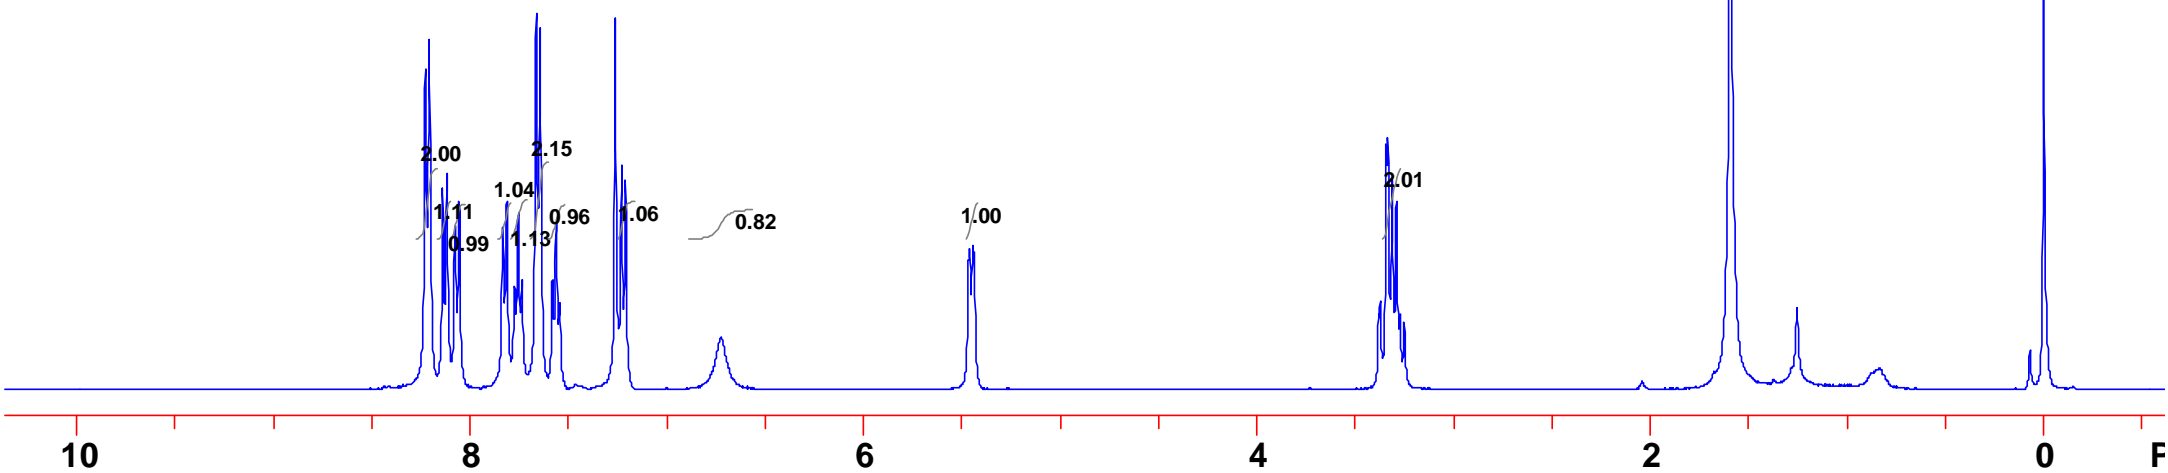

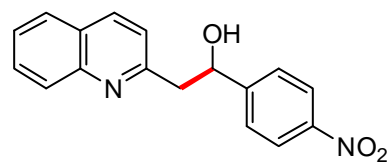

3o

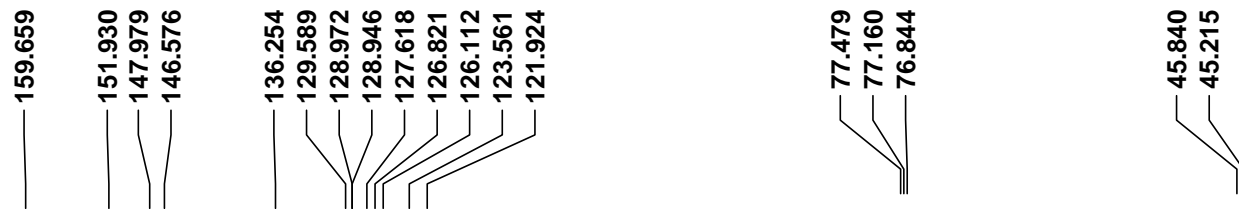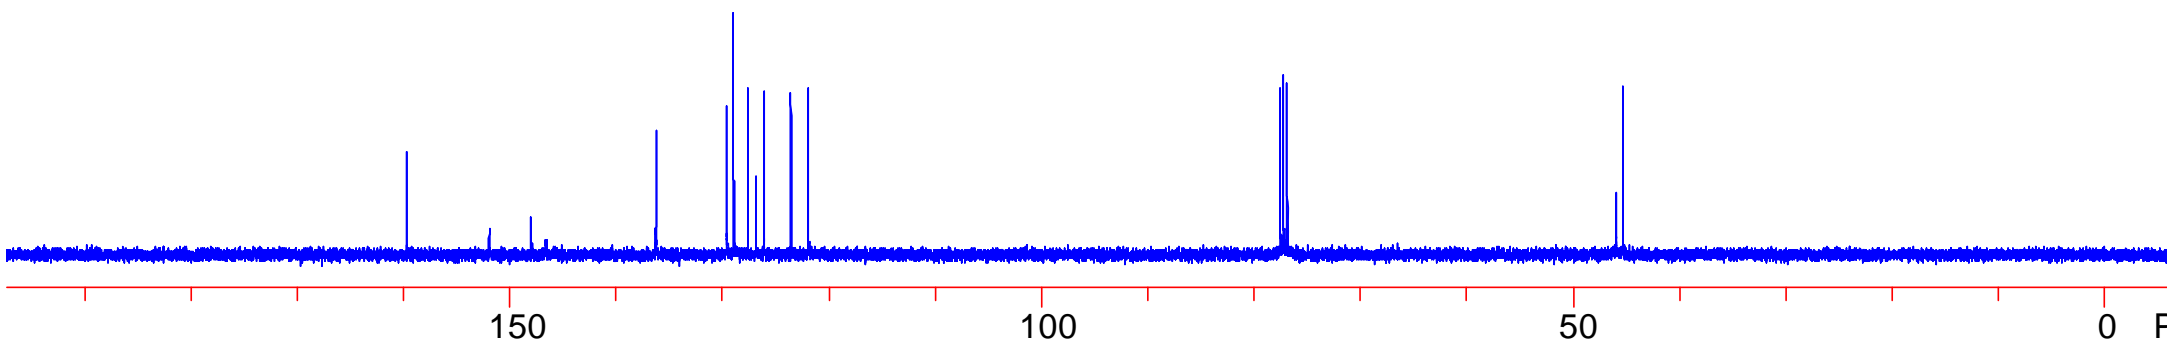

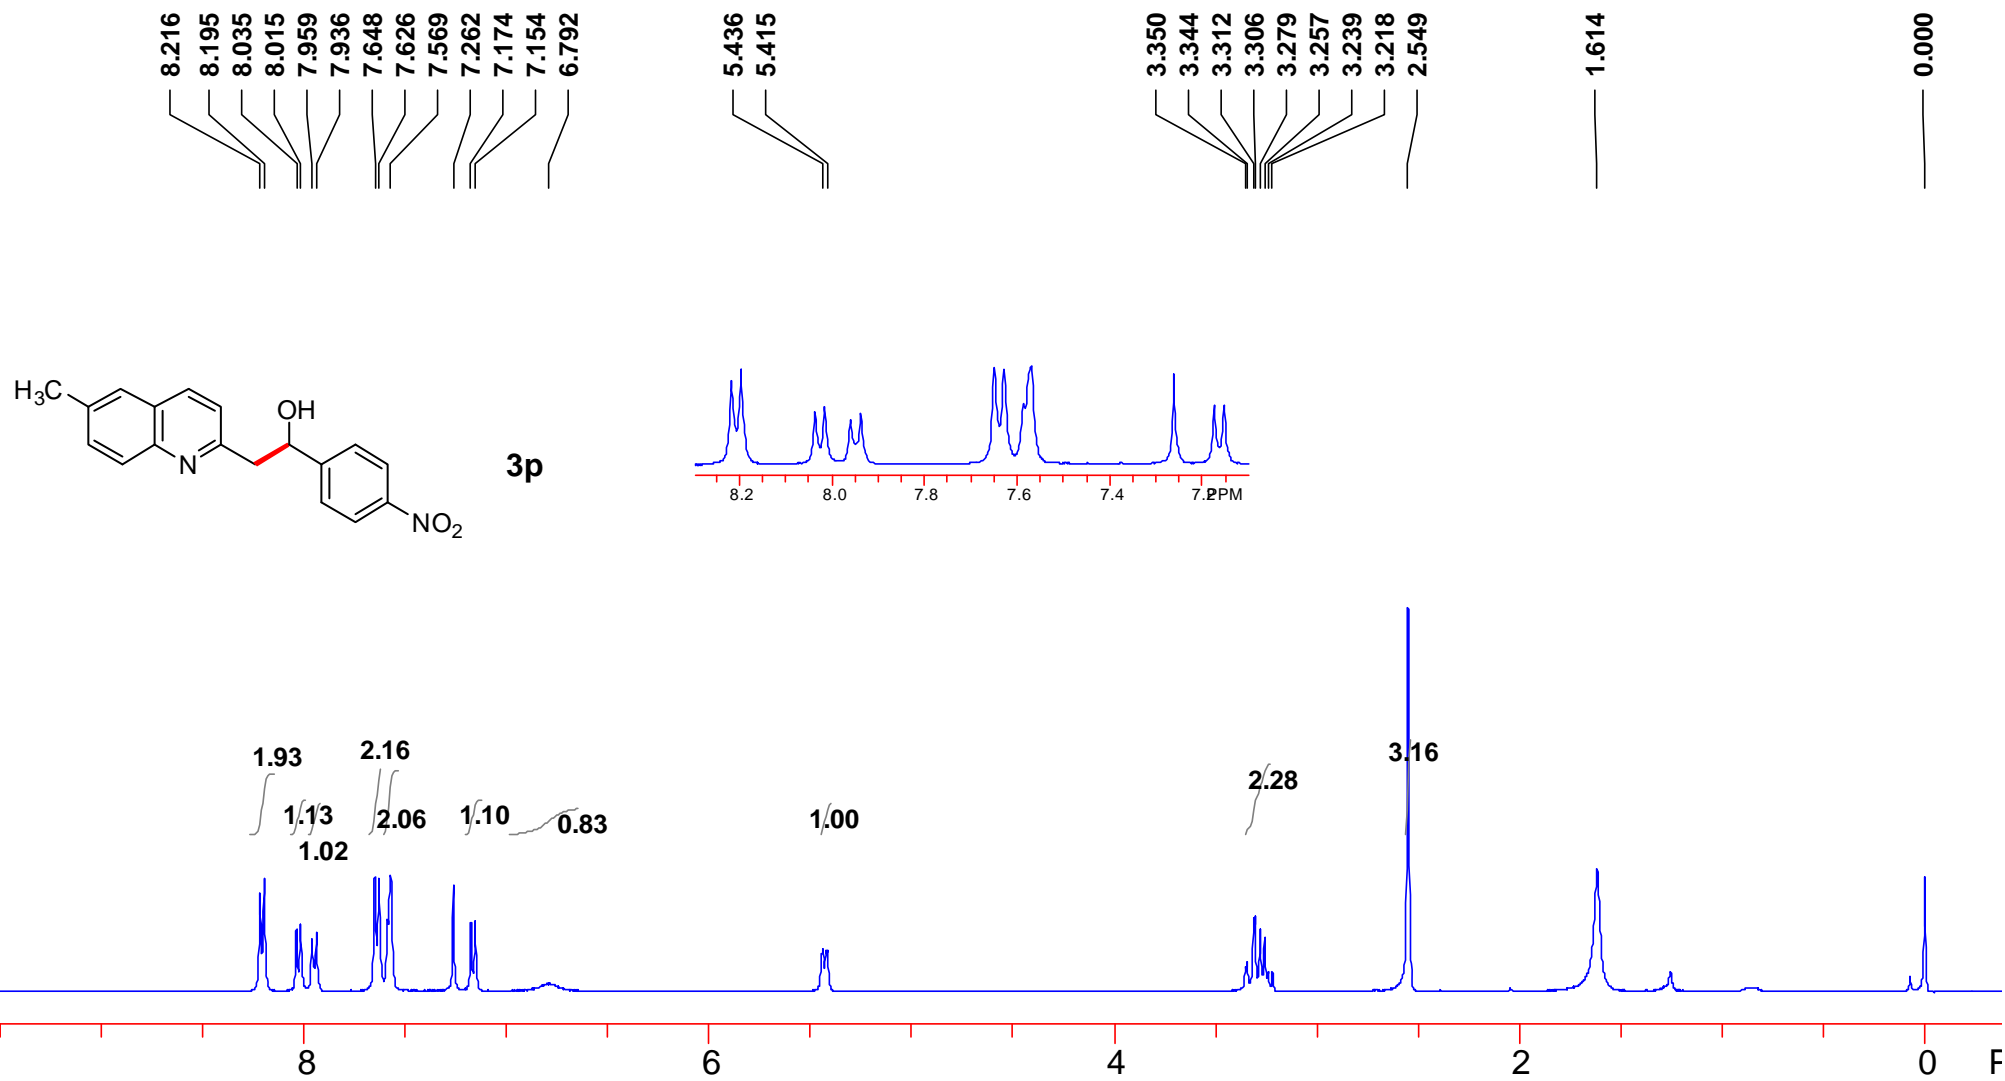

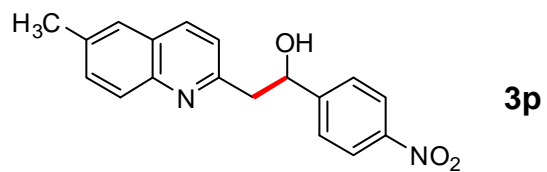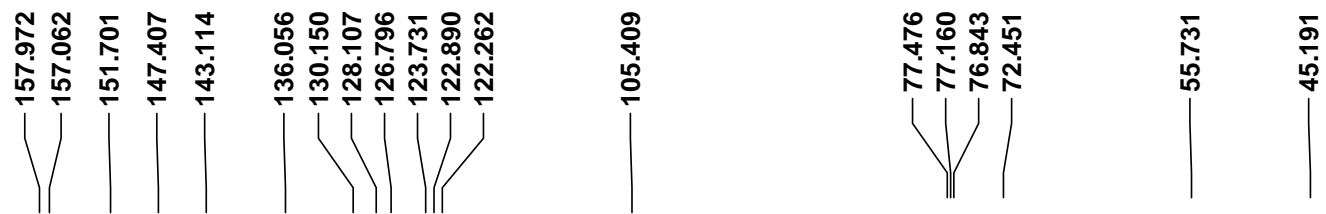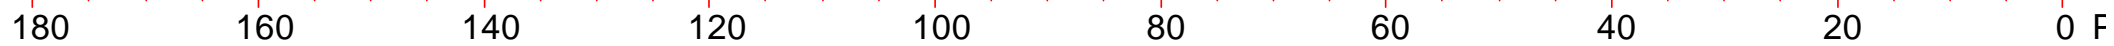



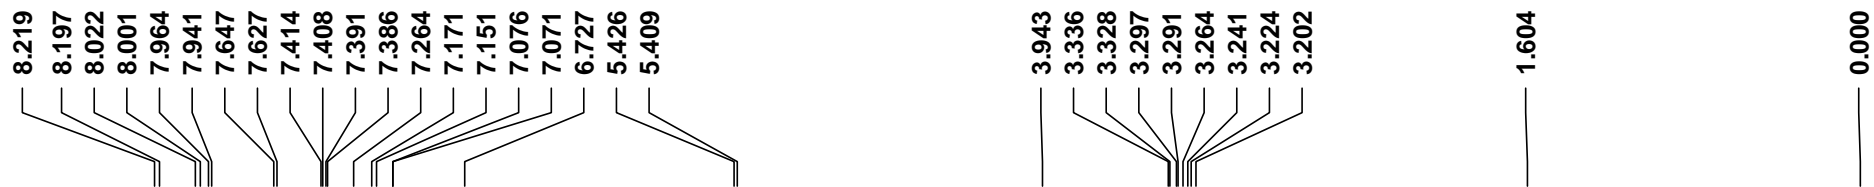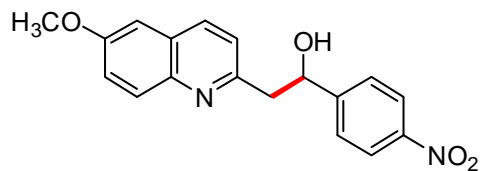

3q

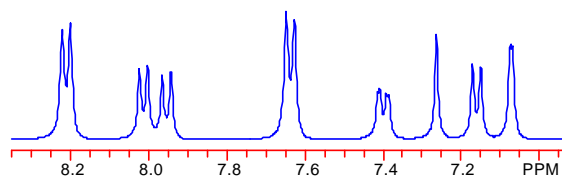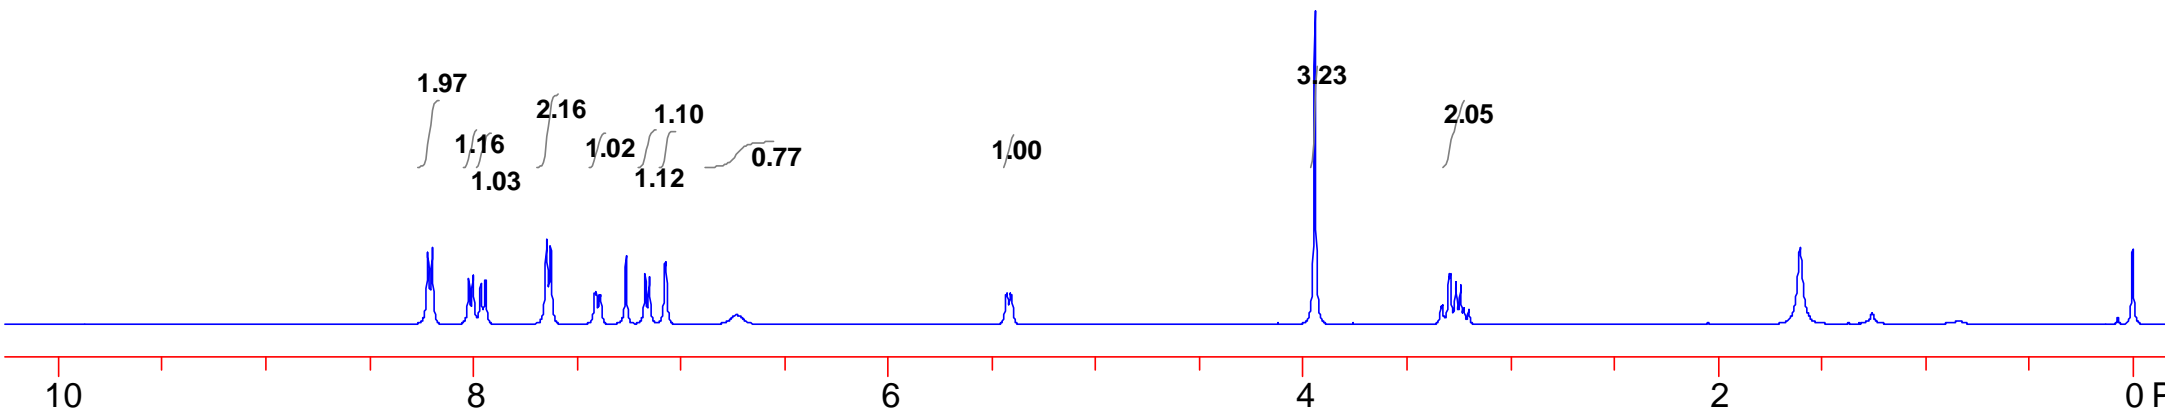

159.671  
151.971  
147.993  
146.622  
136.239  
132.443  
129.575  
128.968  
127.602  
126.837  
126.104  
123.538  
121.925

77.481  
77.160  
76.845  
72.350

45.789  
45.179

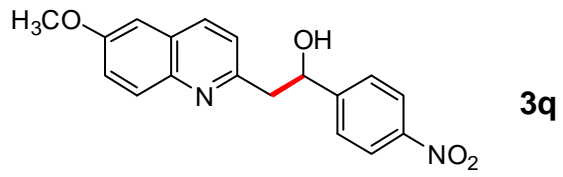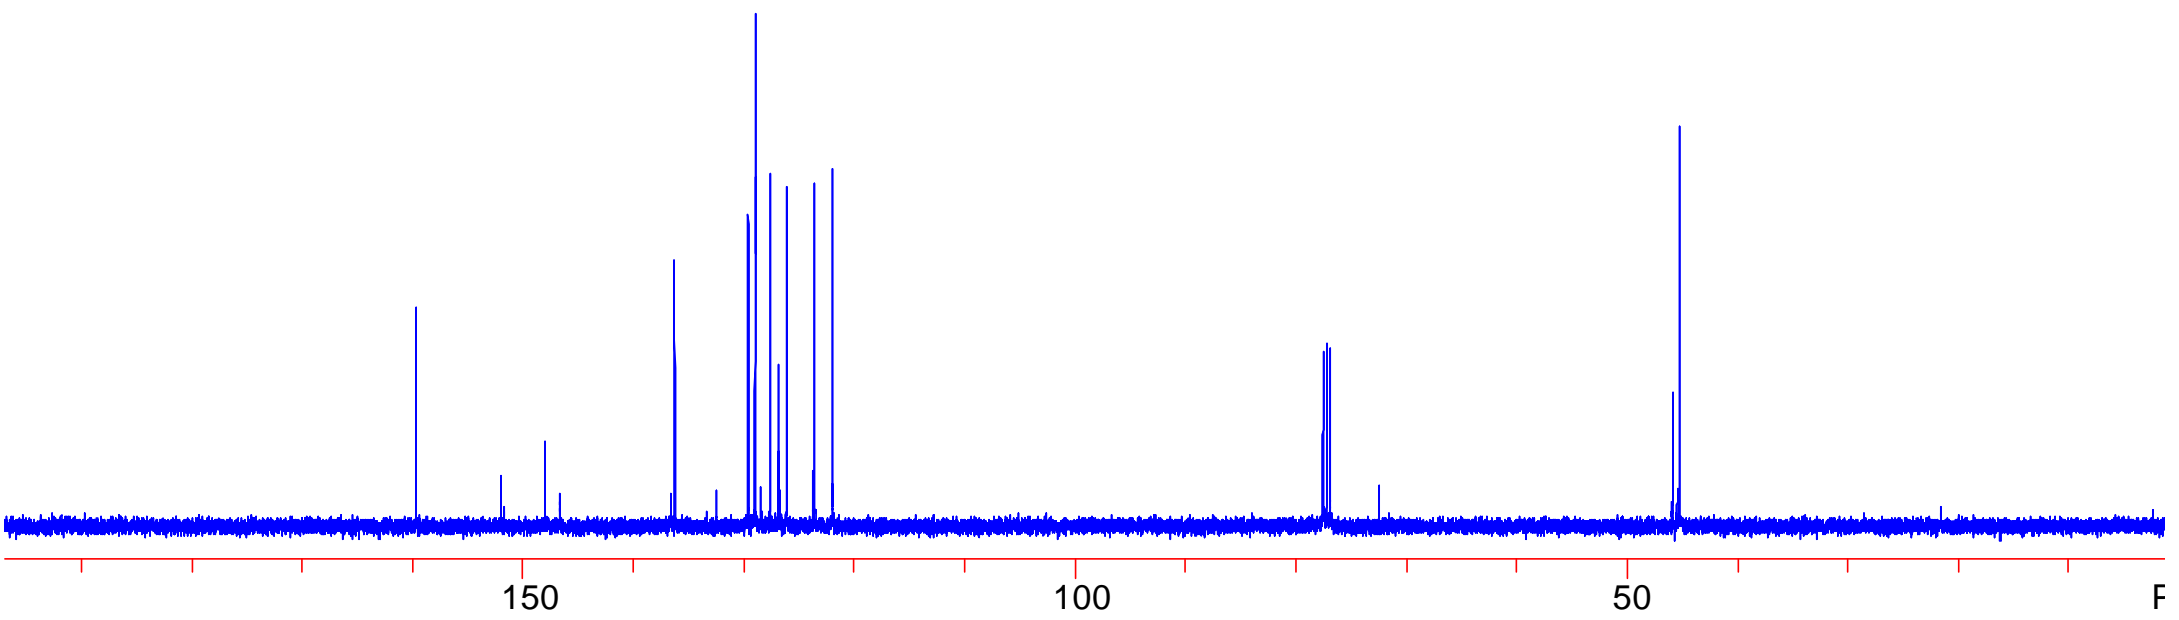

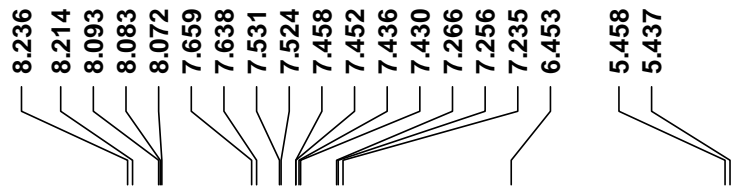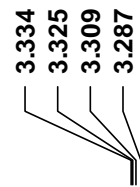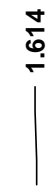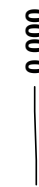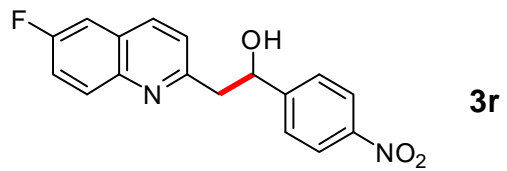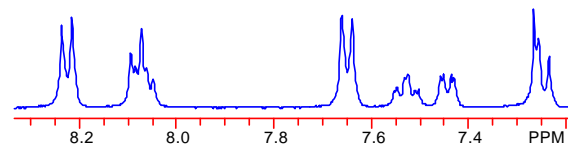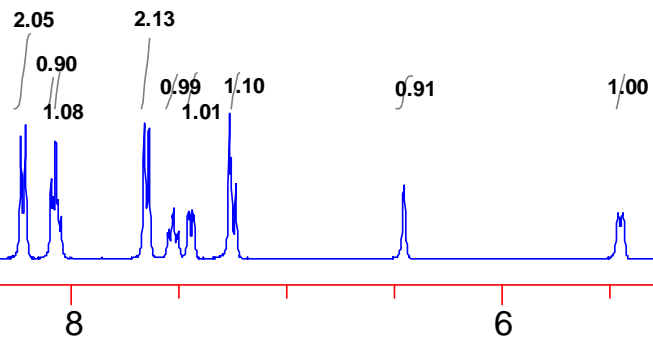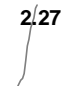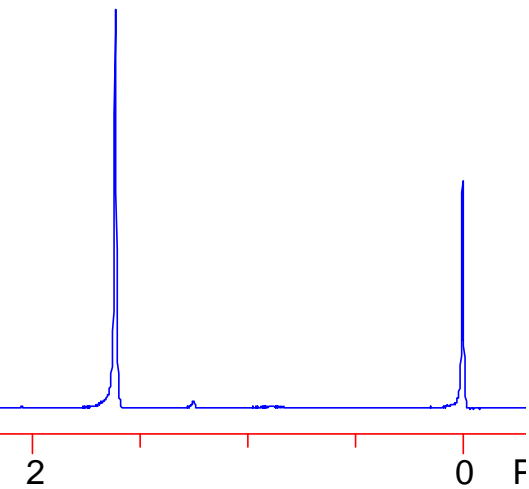

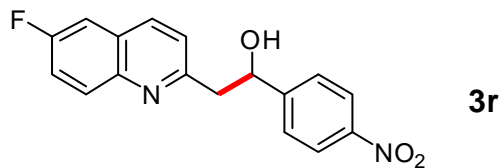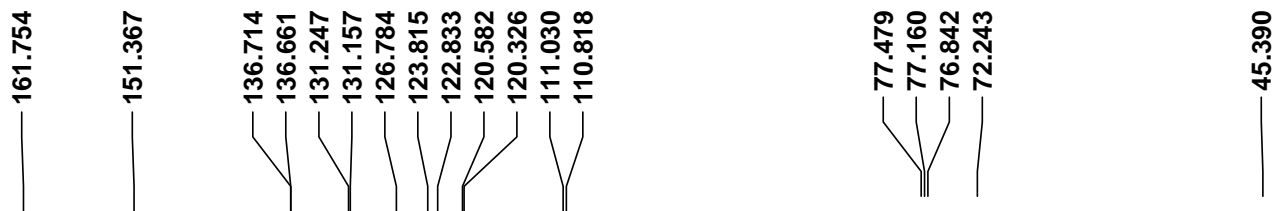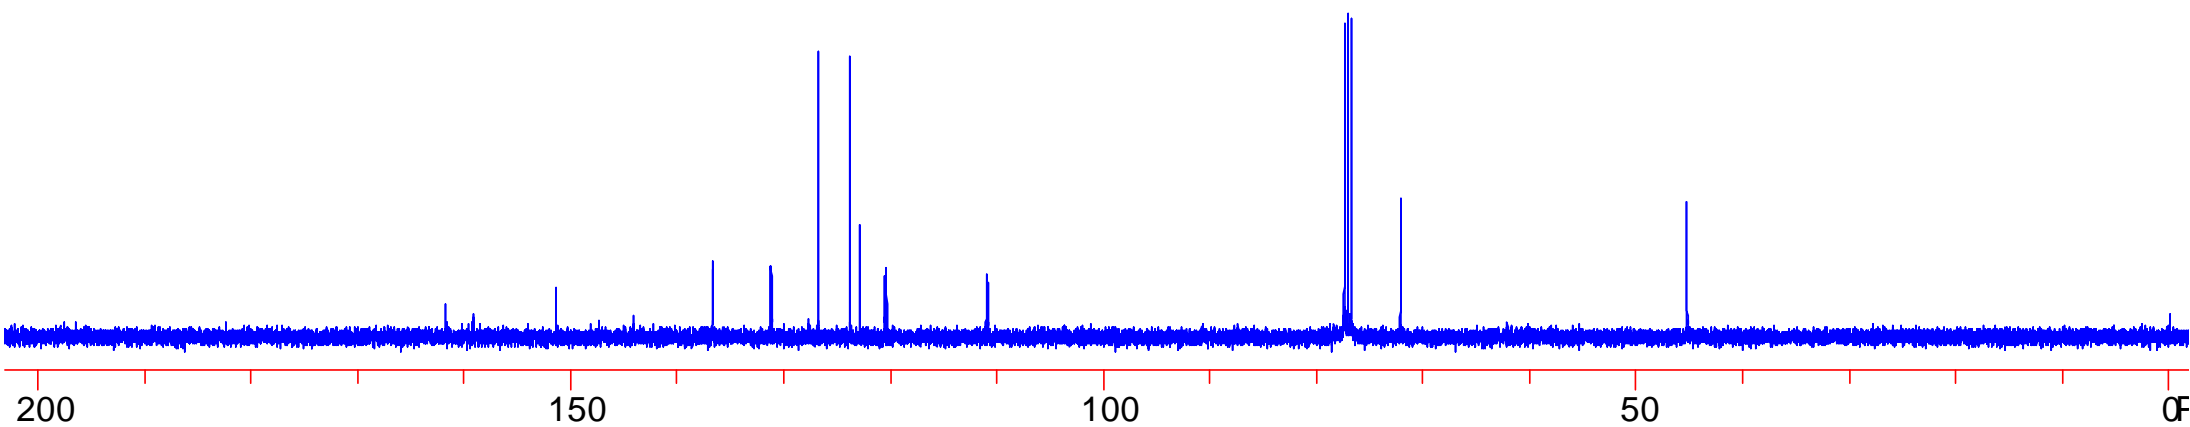

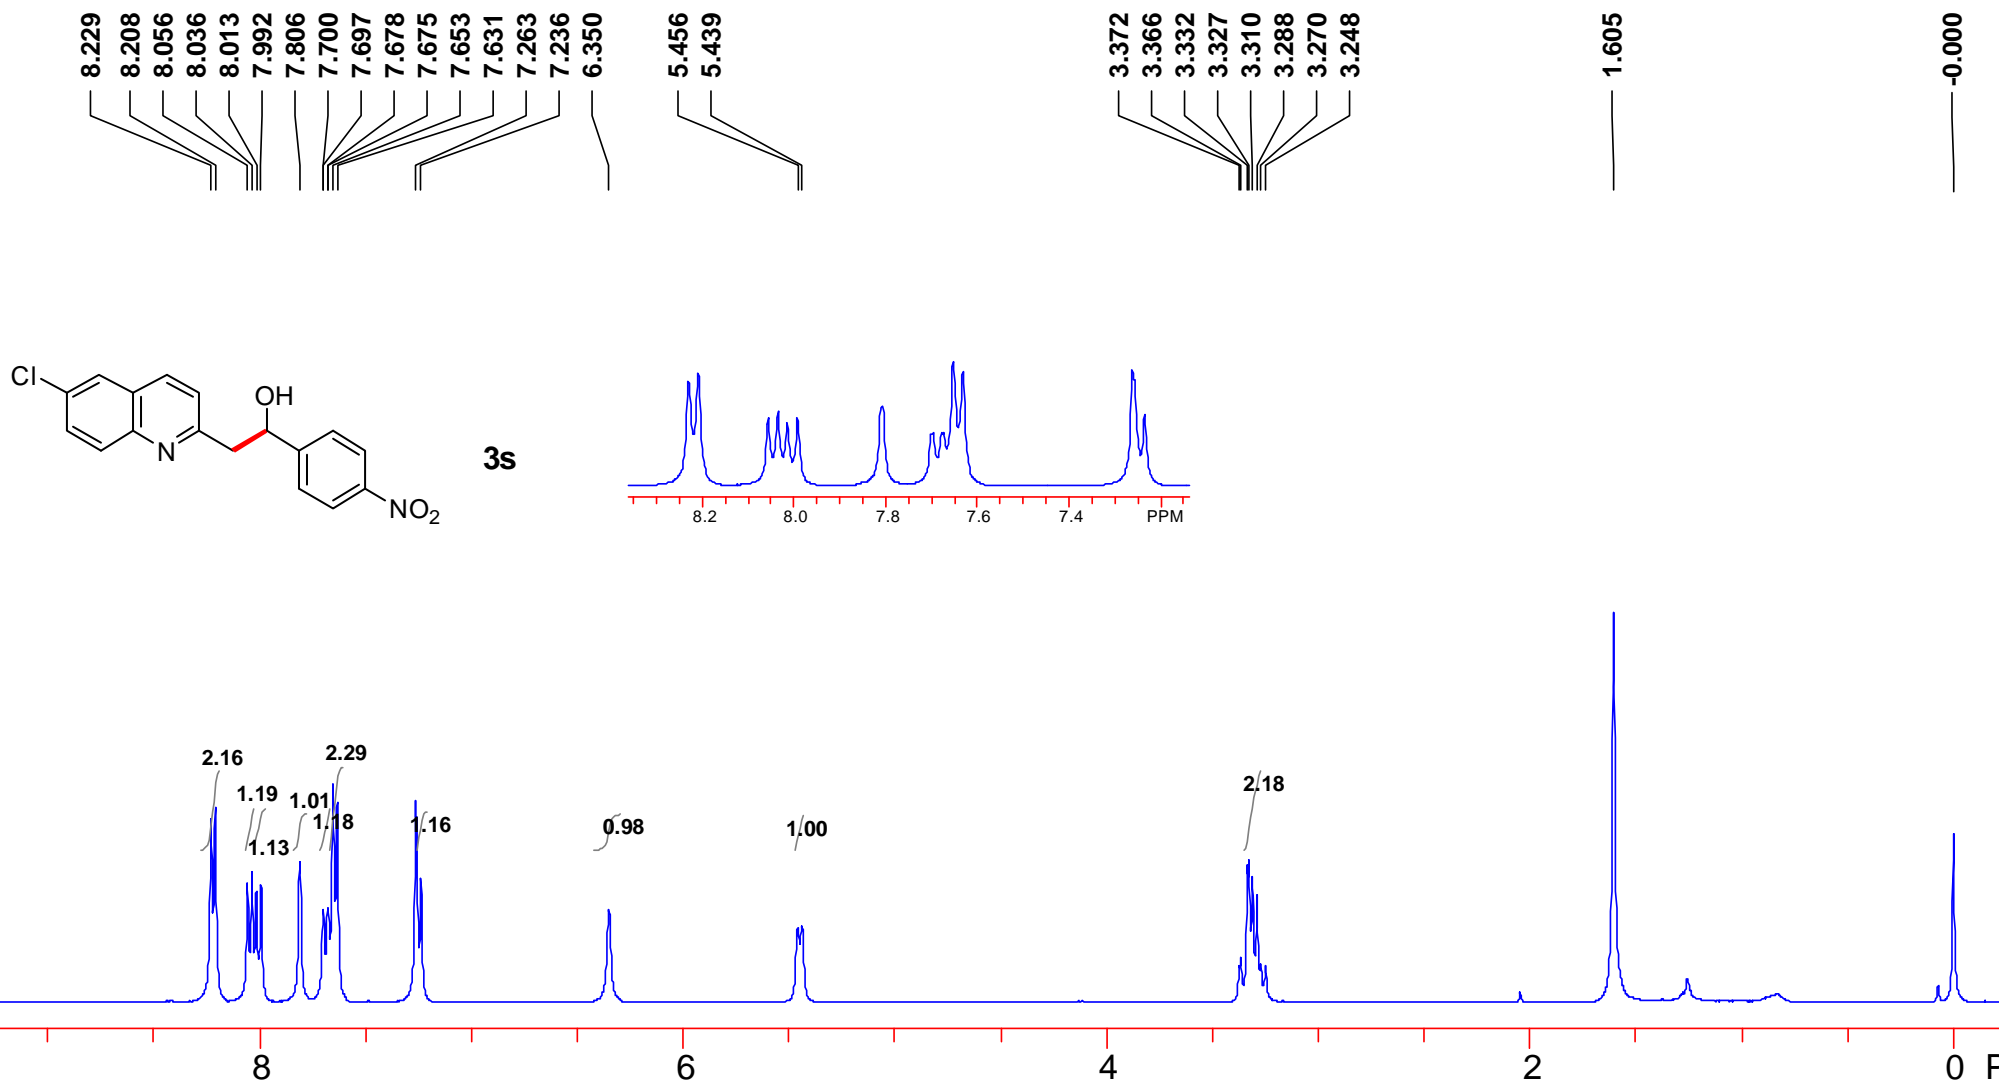

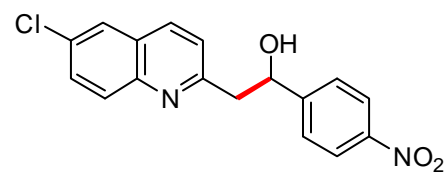

3s

160.076  
151.317  
147.403  
145.484  
136.328  
132.440  
131.132  
130.357  
127.661  
126.768  
126.500  
123.776  
122.966

77.479  
77.160  
76.846  
72.166

45.584

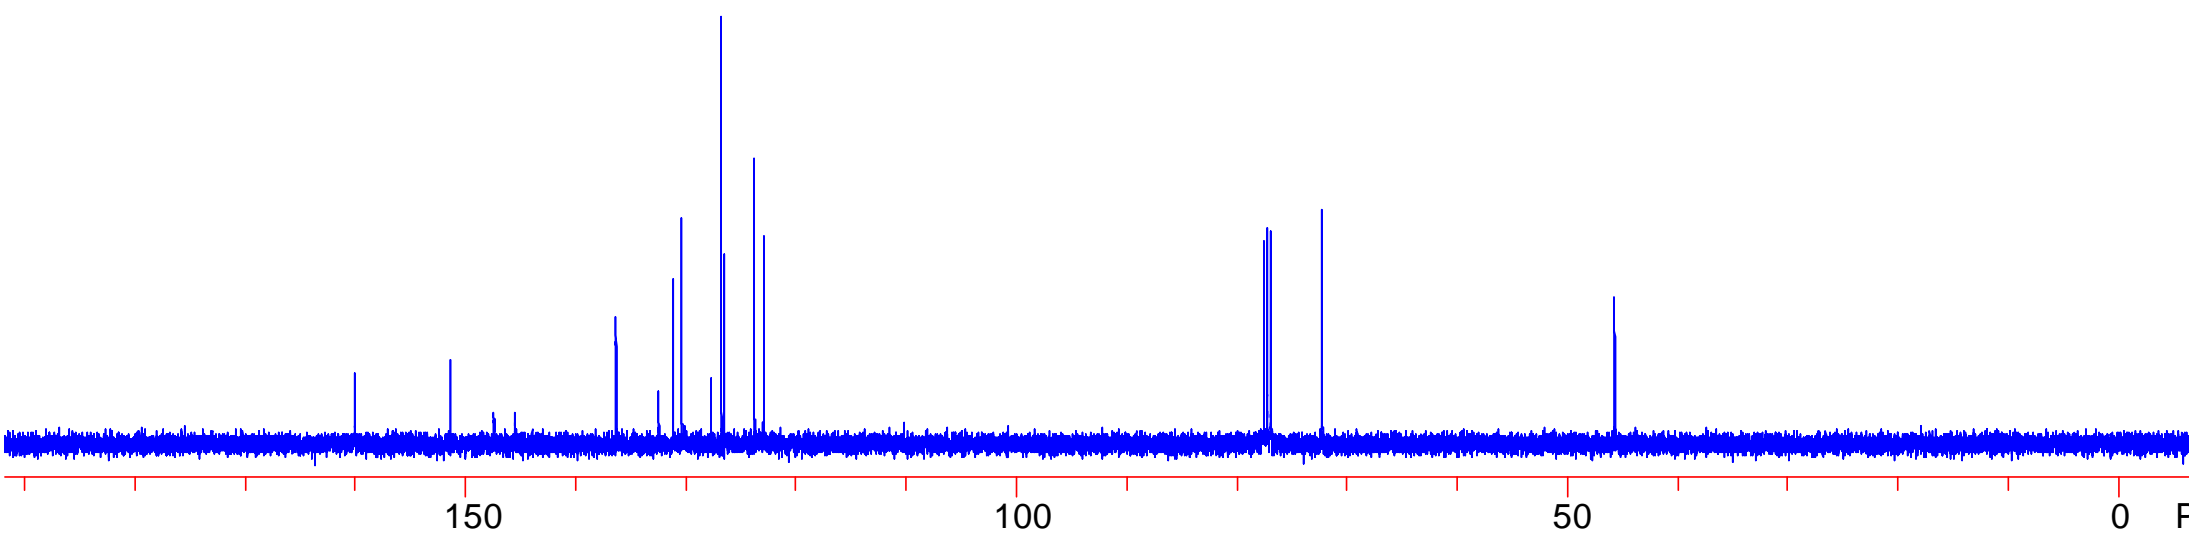

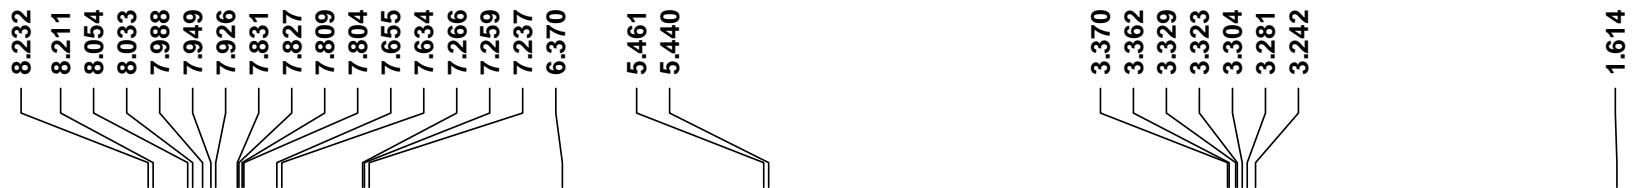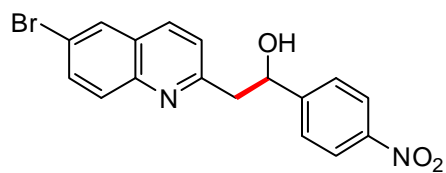

3t

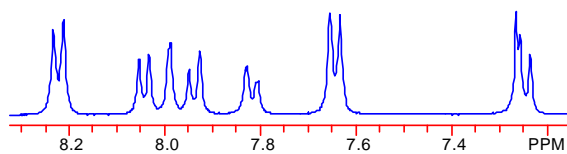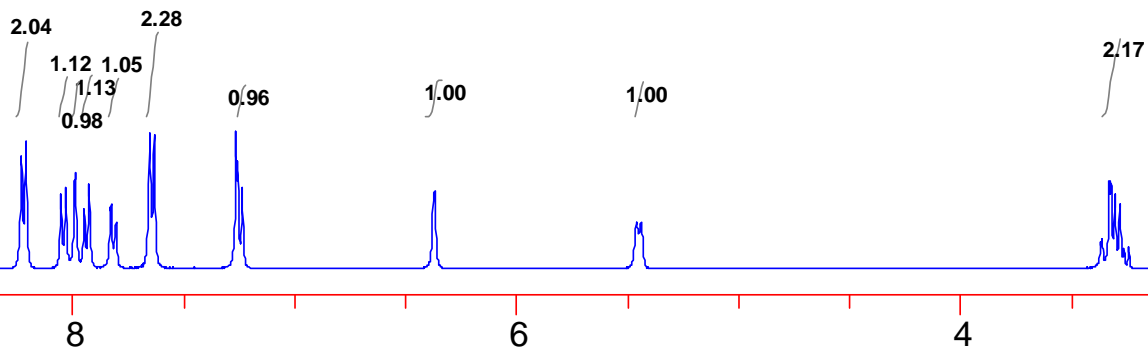

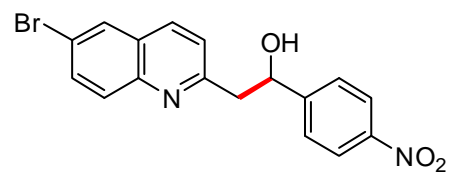

160.236  
151.280  
147.354  
145.642  
136.277  
133.695  
130.456  
129.870  
128.164  
126.767  
123.810  
122.942  
120.501

77.478  
77.160  
76.843  
72.136

45.554

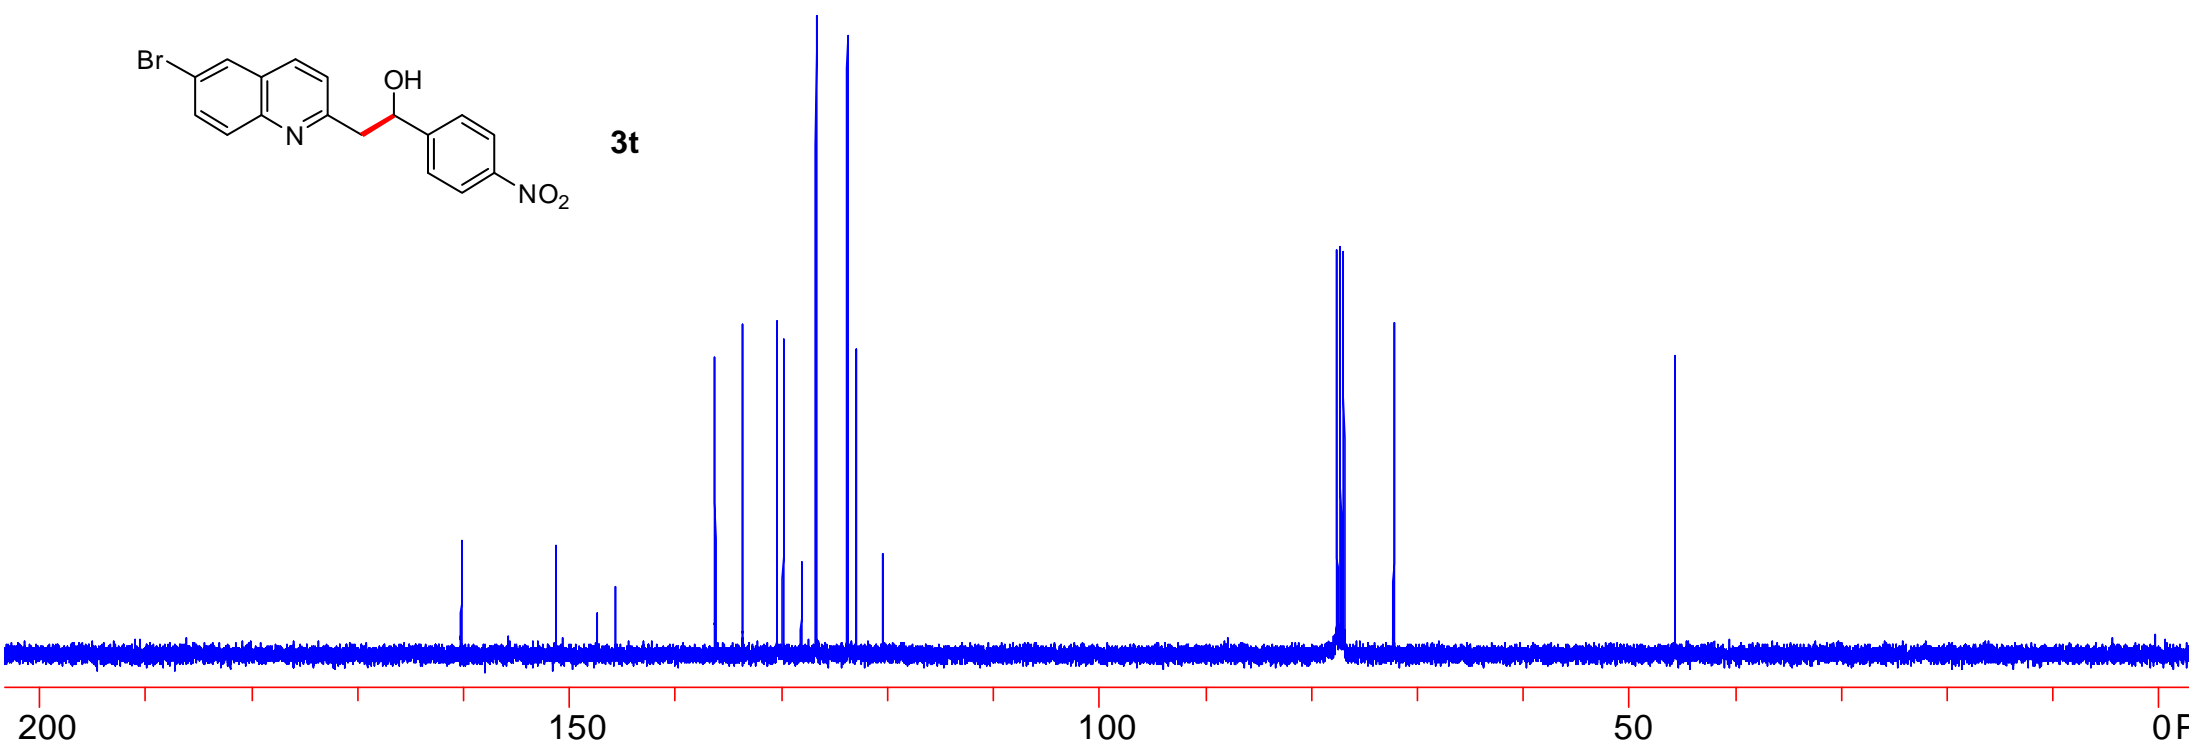

Supplement: c2ob26604k.pdf [file c2ob26604k.pdf]
